## Mitochondrial protein FKBP8 captures PDZD8 to form mitochondria-ER contacts

Koki Nakamura<sup>1,19</sup>, Saeko Aoyama-Ishiwatari<sup>1,19</sup>, Takahiro Nagao<sup>1,19</sup>, Mohammadreza Paaran<sup>2,17</sup>, Christopher J. Obara<sup>3</sup>, Yui Sakurai-Saito<sup>4</sup>, Jake Johnston<sup>2,5</sup>, Yudan Du<sup>1</sup>, Shogo Suga<sup>1</sup>, Masafumi Tsuboi<sup>1</sup>, Makoto Nakakido<sup>1,4</sup>, Kouhei Tsumoto<sup>1,4,6</sup>, Yusuke Kishi<sup>7,16</sup>, Yukiko Gotoh<sup>7</sup>, Chulhwan Kwak<sup>8,18</sup>, Hyun-Woo Rhee<sup>9</sup>, Jeong Kon Seo<sup>10,11</sup>, Hidetaka Kosako<sup>12</sup>, Clint Potter<sup>2,17</sup>, Bridget Carragher<sup>2,17</sup>, Jennifer Lippincott-Schwartz<sup>3</sup>, Franck Polleux<sup>13,14,15</sup>, Yusuke Hirabayashi<sup>1,4,20,\*</sup>

<sup>1</sup> Department of Chemistry and Biotechnology, School of Engineering, The University of Tokyo, Tokyo 113-8656, Japan

<sup>2</sup> Simons Electron Microscopy Center, New York Structural Biology Center, New York, NY 10028, USA

<sup>3</sup> Janelia Research Campus, Howard Hughes Medical Institute, Ashburn, VA 20147, USA

<sup>4</sup> Department of Bioengineering, School of Engineering, The University of Tokyo, Tokyo 113-8656, Japan

<sup>5</sup> Columbia University Medical Center, New York, NY 10032, USA

<sup>6</sup> Medical Proteomics Laboratory, The Institute of Medical Science, The University of Tokyo, Tokyo 108-8639, Japan

<sup>7</sup> Graduate School of Pharmaceutical Sciences, The University of Tokyo, Tokyo 113-0033, Japan

<sup>8</sup> Department of Chemistry, Seoul National University, Seoul 08826, Republic of Korea

<sup>9</sup> School of Biological Sciences, Seoul National University, Seoul 08826, Republic of Korea

<sup>10</sup> Graduate School of Semiconductor Materials and Devices Engineering, Ulsan National Institute of Science and Technology (UNIST), Ulsan 44919, Republic of Korea

<sup>11</sup> UNIST Central Research Facilities (UCRF), Ulsan National Institute of Science and Technology (UNIST), Ulsan 44919, Korea

<sup>12</sup> Division of Cell Signaling, Fujii Memorial Institute of Medical Sciences, Institute of Advanced Medical Sciences, Tokushima University, Tokushima 770-8503, Japan

<sup>13</sup> Department of Neuroscience, Columbia University Medical Center, New York, NY 10032, USA

<sup>14</sup> Mortimer B. Zuckerman Mind Brain Behavior Institute, New York, NY 10027, USA

<sup>15</sup> Kavli Institute for Brain Sciences, Columbia University Medical Center, New York, NY 10027, USA

<sup>16</sup> Present address: Laboratory of Molecular Neurobiology, Institute for Quantitative Biosciences, The University of Tokyo, Tokyo 113-0032, Japan

<sup>17</sup> Present address: Chan Zuckerberg Imaging Institute, Redwood City, CA, USA

<sup>18</sup> Present address: Department of Neurosurgery, Stanford University School of Medicine, Stanford, CA 94304, USA

<sup>19</sup> These authors contributed equally

<sup>20</sup> Lead Contact

\* Corresponding author:

Yusuke Hirabayashi, Ph.D.

e-mail: [hirabayashi@chembio.t.u-tokyo.ac.jp](mailto:hirabayashi@chembio.t.u-tokyo.ac.jp)

The University of Tokyo

Department of Chemistry and Biotechnology, School of Engineering

7-3-1 Hongo, Bunkyo-ku, Tokyo

Japan, 113-8656

Tel: +81-3-5841-7281

## SUMMARY

Mitochondria-ER membrane contact sites (MERCS) represent a fundamental ultrastructural feature underlying unique biochemistry and physiology in all cells. The ER protein PDZD8 is required for the formation of MERCS in many cell types. PDZD8 tethering partner on the outer mitochondrial membrane (OMM) is unknown, limiting our understanding of MERCS formation and function. Here, by combining unbiased proximity proteomics, CRISPR-Cas9 endogenous protein tagging, Cryo-electron microscopy (Cryo-EM) tomography, and correlative light-EM (CLEM), we identified the OMM protein FKBP8 as the tethering partner of PDZD8 at MERCS. Single molecule tracking of PDZD8 revealed highly dynamic diffusion properties along the ER contrasting with capture at contacts between ER and mitochondria. Overexpression of FKBP8 was sufficient to recruit PDZD8 along the OMM and narrow the ER-OMM distance, whereas independent versus combined deletions of these two proteins demonstrated their interdependence for MERCS formation. Our results identify a novel molecular complex tethering ER-mitochondria membranes in mammalian cells.

## INTRODUCTION

Mitochondria and the endoplasmic reticulum (ER) form contact sites (Mitochondria-ER contact sites: MERCS), an ultrastructural feature conserved in unicellular eukaryotes and metazoans. MERCS are the most abundant membrane contact sites (MCS) between organelles in many cell types and serve as a unique subcellular platform for exchanging metabolites such as  $\text{Ca}^{2+}$  and glycerophospholipids. In addition to these critical biochemical reactions, key physiological and cell biological events essential for the maintenance of cellular homeostasis, including mitochondrial fission, mitochondrial DNA replication, and autophagosome biogenesis occur at these contact sites.<sup>1-3</sup>

Observations with electron microscopy (EM) have demonstrated that mitochondria and ER membranes are closely apposed at MCS, necessitating proteins able to tether these two membranes within tens of nanometers of one another.<sup>4</sup> Intensive screening studies have identified multiple proteins localizing at MERCS in mammalian cells.<sup>1,5-7</sup> Among those, the ER-resident protein PDZD8 was identified as a paralog of yeast Mmm1, a component of the ER-mitochondria encounter structure (ERMES).<sup>8,9</sup> Although the ERMES as a full complex is lost in mammals, PDZD8 is required for forming the majority of MERCS (~40-80%) in various cell types, and its deletion in cell lines and in mouse cortical neurons results in the disruption of intracellular  $\text{Ca}^{2+}$  dynamics by decreasing the fraction of  $\text{Ca}^{2+}$  released from the ER that can be buffered by mitochondria.<sup>8,10-12</sup> Consistent with its role in neurons of central nervous system (CNS), PDZD8 regulates dendritic  $\text{Ca}^{2+}$  dynamics in hippocampal CA1 and underlies the tuning properties of place cells *in vivo*.<sup>13</sup> Furthermore, genetic loss of function mutations of *PDZD8* in humans leads to syndromic intellectual disability.<sup>14</sup> In addition, expression quantitative trait loci (eQTL) mapping identified a single-nucleotide polymorphism affecting the expression of PDZD8 in the dorsolateral prefrontal cortex in a population of patients with high risk for post-traumatic stress disorder (PTSD).<sup>15</sup> Thus, PDZD8 plays a critical role in controlling neuronal and circuit function, and proper brain development and homeostasis in invertebrates and vertebrates.<sup>12</sup>

In addition to MERCS, the ER forms other MCSs with other organelles such as lysosomes, endosomes, Golgi apparatus, lipid droplets, and the plasma membrane (PM).<sup>2,16-19</sup> We and other groups have previously shown that PDZD8 localizes at MERCS in various cell types,<sup>8,20,21</sup> however, it has also been reported recently that overexpression of Rab7 or LAMP1 can recruit PDZD8 to the ER-late endosome or

ER-lysosome contact sites, respectively.<sup>20,22,23</sup> In addition, overexpression of PDZD8 and Rab7 recruits the mitochondria to ER-endosome contact sites, and was proposed to lead to the formation of three-way MCS.<sup>20</sup> Therefore, PDZD8 might participate in the formation of MCS networks besides tethering MERCS. As such, it is anticipated that a molecular mechanism exists to specifically recruit PDZD8 to MERCS. However, to date, the tethering partner of PDZD8 at MERCS is unknown. To elucidate the molecular mechanisms underlying PDZD8-dependent MERCS formation, we used multiple independent proximity-based proteomic approaches relying on endogenous protein tagging. Since overexpression of PDZD8 can alter its subcellular distribution,<sup>8</sup> we implemented CRISPR-Cas9 technology to generate knock-in cell lines where endogenous PDZD8 is tagged with various epitopes, fluorescent proteins or catalytic enzymes, allowing its localization by microscopy or proximity-based proteomic screens. We demonstrate that the mitochondrial protein FK506 binding protein 8 (FKBP8 also known as FKBP38) is a novel, direct PDZD8-interacting protein, and that the PDZD8-FKBP8 complex is required for MERCS formation in metazoan cells. Using combinations of Cryo-EM tomography and correlative light-electron microscopy (CLEM), we revealed the ultrastructural features of MERCS mediated by the PDZD8-FKBP8 tethering complex.

## RESULTS

### Subcellular localization of endogenous PDZD8

While we previously reported that a significant fraction of PDZD8 localizes at MERCS,<sup>8</sup> it has been recently shown that PDZD8 can also localize to the ER-late endosome and ER-lysosome contact sites.<sup>11,20,22,23</sup> Some of these studies failed to detect the enrichment of PDZD8 at MERCS, however, in the absence of reliable antibodies detecting endogenous PDZD8 protein by immunofluorescence, most of these studies relied on overexpression of tagged forms of PDZD8 which disrupts both its subcellular localization and can generate gain-of-function phenotypes, for instance by increasing the number and size of MERCS or other MCSs where it is localized. Therefore, to determine the subcellular distribution of endogenous PDZD8 protein at MCS formed by the ER, we developed a knock-in mouse embryonic fibroblast NIH3T3 cell line fusing the fluorescent protein Venus sequence to the C-terminus of the *Pdzd8* coding sequence (**Fig. 1A, Fig. S1A**). To avoid an artifactual increase in size and/or biogenesis of late endosome/lysosome due to overexpression of key effector proteins Rab7 or LAMP1, colocalization analyses were performed by detecting these proteins at endogenous levels with antibodies against endogenous markers (LAMP1 for lysosomes, Rab7 for the late endosomes, and Tomm20 and OXPHOS proteins for mitochondria). In agreement with previous studies, confocal microscopy imaging showed that 14.8% of PDZD8-Venus visualized by an anti-GFP antibody overlapped with LAMP1 staining, and under these endogenous expression conditions 7.7% overlapped with Rab7 staining. However, a significantly larger fraction overlapped mitochondria labeled either with Tomm20 (25.0%) or OXPHOS staining (22.1%), suggesting that endogenous PDZD8 is present at multiple MCS but is most abundant at MERCS (**Fig. 1B-E**).

To directly investigate this in live cells, we investigated the dynamics of endogenously expressed PDZD8 using time-lapse imaging. The *PDZD8*-HaloTag KI HeLa cell line (**Fig. 1F, Fig. S1B**) was transiently transfected with the ER-localized reporter (BiP-mtagBFP2-KDEL) and a mitochondria-localized reporter (YFP-ActA). The PDZD8-HaloTag was labeled with Janelia Fluor 549 dye. Triple-color time-lapse imaging using confocal microscopy demonstrated that PDZD8-Halotag puncta can be stably localized at

MERCS despite significant dynamics of both ER and mitochondria, suggesting a direct association of PDZD8 with mitochondria may be present (**Fig.1G, Supplemental movie 1**).

### **Single molecule imaging of PDZD8 at the membrane contact sites**

A recent work has shown that the ER-resident MERCS forming protein VAPB exhibits transient but highly frequent visits to MERCS.<sup>24</sup> Thus, to further confirm the localization of PDZD8 on the mitochondrial contact sites, we next examined if individual PDZD8 molecules may show similar dynamics using single particle tracking-photoactivation localization microscopy (sptPALM).<sup>25</sup> Single PDZD8 molecules were visualized by labeling the overexpressed PDZD8-HaloTag with a photoactivatable version of JF646 in COS7 cells (**Supplemental movie 2**). Analysis of localization probabilities using a spatially defined probability function<sup>24</sup> revealed PDZD8 localization was entirely restricted to the ER (**Fig. 2A**). Strikingly, there were regions on the ER where the probability was significantly higher (hotspots), presumably as a result of tethering and engagement. In agreement with our endogenous labeling, about half of them were in close proximity with mitochondria (**Fig. 2A-C, Supplemental Fig. 2**; 90 out of 192 hotspots). By following the trajectories of single PDZD8 molecules around and within these putative mitochondria-contact sites (MitoCS), we found that PDZD8 can dynamically enter and exit these hotspots in seconds (**Fig. 2B and C, Supplemental movie 3**). Importantly, the effective diffusion ( $D_{\text{eff}}$ ) of single PDZD8 molecules within MitoCS was significantly reduced compared the rest of the ER ( $0.22 \pm 0.0025 \mu\text{m}^2/\text{s}$  in MitoCS, mean  $\pm$  SEM,  $n = 90$ ; **Fig. 2E**) suggesting that PDZD8 is captured at MERCS but still remains mobile at these contact sites. Consistent with this, PDZD8 single particles dwell at the hotspots for a median time of just 1.1 seconds per each visit (**Fig. 2G**). In addition to MitoCS, we also observed spots with high probability of PDZD8 that were not mitochondria-associated, which might correspond to non-mitochondrial organelle-contact sites (OtherCS, **Fig. 2A,B,D**). The  $D_{\text{eff}}$  and dwell time of PDZD8 in the OtherCS is similar to those in MitoCS, but the mean of individual CS area was significantly larger at MitoCS than in the OtherCS (**Fig. 2F**). The interactions of PDZD8 at MERCS are notably more dynamic than the ER proteins VAPA or STIM1 localizing at ER contact sites with the plasma membrane.<sup>26,27</sup> We note that despite the rapid tether exchange reported here, the size of the contact sites observed with PDZD8 is significantly larger and the mean dwell time of PDZD8 at the contact site was significantly longer compared to those reported with VAPB (**Fig. 2F,G**).<sup>24</sup> The fact that the behavior of PDZD8 and VAPB at the MCS differs suggests that PDZD8 interaction at MERCS may represent a distinct, specific tethering from the interactions described for VAPB. Taken together, these data suggest that PDZD8 is highly dynamic along the ER but drastically slows down at contacts with mitochondria as well as other potential MCS.

### **Identification of FKBP8 as a direct binding partner of PDZD8 using unbiased *in vivo* proteomic screens**

To identify the tethering partner of PDZD8 facilitating this behavior at MERCS, we designed unbiased proteomic screens using endogenous PDZD8 protein immunoprecipitation coupled with mass spectrometry (IP-MS). Again, to avoid artifactual mislocalization due to PDZD8 overexpression, we established a new mouse line engineered with a 3 $\times$ HA tag fused to the endogenous PDZD8 protein using CRISPR-Cas9 mediated genomic knock-in (*Pdzd8*-3 $\times$ HA KI mouse line) (**Fig. 3A, Fig. S3A and B**). Since PDZD8 is expressed at high levels in neurons, protein complexes were isolated from the neocortex of either *Pdzd8*-3 $\times$ HA KI mice or control littermates at postnatal 10 days by IP using anti-HA antibody

(**Fig. 3B**). Identification of the corresponding proteins immunoprecipitated in complex with PDZD8-3×HA by LC-MS/MS revealed that, in addition to previously identified PDZD8 interactors such as Protrudin, VAPA and VAPB,<sup>11,28</sup> proteins known to localize at MERCS and/or mitochondria were significantly enriched in the immunoprecipitates from the KI mice compared to the control mice (**Fig. 3C, Table S1**). Next, in order to narrow down the protein list to only proteins in close proximity to PDZD8, we employed an independent approach, a proximity-based labeling screen using a biotin ligase TurboID.<sup>29</sup> Again, to avoid overexpression-induced artifacts, we established a *PDZD8*-TurboID KI HeLa cell line using CRISPR-Cas9 knock-in technology (**Fig. 3D and E**). These *PDZD8*-TurboID KI HeLa cells were treated with biotin for 6 hours and biotinylated peptides were isolated using tamavidin 2-REV beads and identified by LC-MS/MS (**Fig. 3F, Table S2**). Among 166 proteins identified by this screening approach, 12 proteins were also identified by the IP-MS-based screen (**Fig. 3G**). Among the candidate interactors, the only protein localizing at the outer mitochondrial membrane (OMM) was FKBP8 (**Fig. 3G**). Finally, we also performed a proteomic screen using TurboID in a mouse neuroblastoma cell line (Neuro2a) and again identified FKBP8 in the list of biotinylated proteins (**Fig. S3C and D**). Specific co-immunoprecipitation of FKBP8 and PDZD8 was confirmed by Western blotting using the *Pdzd8*-3×HA knock-in mouse (**Fig. 3H**) and *Pdzd8*-Venus KI NIH3T3 cells (**Fig. 3I**). These results strongly suggest that PDZD8 and FKBP8 reside in the same protein complex.

### PDZD8 and FKBP8 colocalize on mitochondria

Although the vast majority of FKBP8 localizes at the mitochondria, an escape of FKBP8 from mitochondria to the ER has been reported upon mitophagy induction.<sup>30</sup> Therefore, to determine if PDZD8 colocalizes with the ER-resident FKBP8 (*cis*-interaction) or with the mitochondrial FKBP8 (*trans*-interaction), we determined the subcellular compartments where PDZD8 and FKBP8 colocalize. Immunostaining using anti-FKBP8 antibodies showed a puncta-like distribution of endogenous FKBP8 and revealed that 88.2% of FKBP8 is localized at mitochondria in HeLa cells (**Fig. 3J and K, Fig. S3E**). Outside of the mitochondria ('off mito' regions), 16.5% of the endogenous PDZD8-Halo puncta overlapped with the FKBP8 puncta. However, the overlap was not decreased when the FKBP8 channel was arbitrarily rotated 180° as a control for a scrambled position, suggesting that most of them were considered to overlap 'by chance'. In contrast, on the mitochondria, the overlap between endogenous PDZD8 and FKBP8 (54.0%) was significantly higher compared to the scrambled control (23.2%) and off-mitochondria overlaps (**Fig. 3L**). Furthermore, PDZD8 puncta were significantly enriched on the FKBP8-positive area of mitochondria (**Fig. 3M**).

To independently confirm these results in cells derived from a different species and using endogenous tagging of FKBP8 and PDZD8 simultaneously, we developed a dual KI strategy (**Fig. S3F**), whereby an HA-tag was knocked-in at the *Fkbp8* genomic locus to express HA-FKBP8 in the *Pdzd8*-Venus KI NIH3T3 cell line. Consistent with the localization in HeLa cells, the overlap of PDZD8 and FKBP8 was significantly higher than the randomized control only on the mitochondria (**Fig. S3G-I**). These results strongly suggest that the majority of PDZD8 localized at the ER membrane interacts with FKBP8 localized on the mitochondria in *trans*.

### Direct interaction between PDZD8 and FKBP8 proteins

To test if the interaction between PDZD8 and FKBP8 is direct, we measured the binding affinity of PDZD8-FKBP8 interaction *in vitro*. We used surface plasmon resonance (SPR) with purified recombinant

cytosolic portions of both FKBP8 and PDZD8 (**Fig. S4 and B**). Recombinant PDZD8 protein without its transmembrane domain ( $\Delta$ TM) were immobilized on a sensor chip and changes of the surface resonance upon recombinant FKBP8 $\Delta$ TM injection were measured. As expected, the SPR responded in a FKBP8 dose-dependent manner in the 2 to 90  $\mu$ M range (**Fig. 4A**). Fitting  $R_{eq}$  (SPR responses in equilibrium) and FKBP8 concentration to the monovalent binding model provided  $K_D$  value of 142  $\mu$ M (**Fig. 4B**). Thus, the affinity between recombinant PDZD8 and FKBP8 is in the same range as other previously reported VAPB-PTPIP51 MERCS tethering complex and is in agreement with the unexpectedly rapid exchange observed by sptPALM.<sup>31</sup>

### **TM and SMP domains of PDZD8 are sufficient for FKBP8 binding**

Next, to identify the protein domains of PDZD8 required for interacting with FKBP8, we conducted co-IP experiments by expressing a series of 3 $\times$ FLAG-tagged PDZD8 deletion mutants together with HA-tagged FKBP8 (**Fig. 4C**). Based on the previous reports suggesting PDZD8's dimerization capability, endogenous full-length PDZD8 can act as a bridge between exogenously expressed truncated forms of PDZD8 and FKBP8, even in the absence of direct binding.<sup>23</sup> To avoid this, we established a tamoxifen-inducible *Pdzd8* conditional KO mouse embryonic fibroblast cell line (*Pdzd8* f/f::Cre<sup>ERT2</sup> MEF) (**Fig. 4D, Fig.S4C and D**). Using a time course analysis, we determined that PDZD8 was undetectable 45 hours after Cre<sup>ERT2</sup>-mediated deletion of the floxed allele by treatment with 4-hydroxytamoxifen (4-OHT; **Fig. S4E**). Whereas truncated forms of PDZD8 including TM-SMP domains co-precipitated FKBP8 efficiently, none of the other domains showed strong binding to overexpressed FKBP8 (**Fig. 4E**). These results suggest that TM-SMP domains of PDZD8 represent the minimal domain mediating interaction with FKBP8. Given that previous protein binding and late endosome/lysosome recruitment functions of PDZD8 are independent of the SMP domain,<sup>20,22,32</sup> the SMP domain of PDZD8 represents a unique interaction domain with FKBP8.

Next, we tested if SMP-C2n-PDZ domain of PDZD8 directly binds to FKBP8 using purified recombinant proteins. Recombinant glutathione S-transferase (GST) - Thrombin cleavage site - human PDZD8 (1,28-506) - HA and human FKBP8 (1-380) - Histag were expressed in *E.coli*. and purified with GST-binding beads and TALON affinity columns, respectively. These purified proteins were mixed *in vitro*, applied to a column with GST-binding beads and eluted by cleaving the thrombin cleavage site. Western blotting analysis revealed that FKBP8 was isolated only when it was incubated with GST-PDZD8 (1,28-506) - HA (**Fig. 4F**). Collectively, these results demonstrate that FKBP8 is a direct binding partner of PDZD8 through the SMP-C2n-PDZ domain.

### **Overexpression of mitochondrial FKBP8 stabilizes and recruits PDZD8 in the proximity of mitochondria**

Our live imaging of endogenously expressed PDZD8 and the single molecule tracking of PDZD8 showed that PDZD8 is highly mobile throughout the ER but shows distinct interactions (confined diffusion) where the ER is contacting mitochondria (**Fig. 1G, 2E, F Supplemental movie 1**). We next tested if the overexpression of FKBP8 affects endogenous ER-localized PDZD8 distribution in cells. We overexpressed a mutated form of FKBP8 previously shown to lock its localization at the OMM (FKBP8<sup>N403K</sup>)<sup>30</sup> in the *Pdzd8*-Venus KI cells. Strikingly, the majority of endogenous PDZD8 protein were now overlapping with OMM-marker Tomm20 in HA-FKBP8<sup>N403K</sup> overexpressing cells (**Fig. 5A-C**). In addition, the fluorescence intensity of endogenous PDZD8-Venus staining was significantly higher with

HA-FKBP8<sup>N403K</sup> overexpression compared to the control (**Fig. 5D**). These results suggest that FKBP8 recruits PDZD8 to OMM and increases its stability.

Next, we examined if overexpression of FKBP8<sup>N403K</sup> recruits the ER together with PDZD8. To this end, we performed a correlative light-electron microscopy (CLEM) analysis. Endogenous PDZD8 was labeled with JF549 dye in the *PDZD8*-HaloTag KI HeLa cell expressing with Venus-FKBP8<sup>N403K</sup>. Confocal microscopy with a Nikon Spatial Array Confocal (NSPARC) detector was employed to capture the JF549 and Venus signals within fixed cells, and the area imaged by confocal microscopy was subsequently re-identified in EM images (**Fig. S5A**). Mitochondria and the ER within 25 nm of mitochondria (MERCs) were segmented in the EM images and then 3D-reconstructed from 8 slices with 50 nm thickness (total 400 nm thick in z axis) (**Fig. 5E, Fig. S5B**). The 3D-reconstructed mitochondria and MERCs was aligned to the confocal microscopy image using the FKBP8 signals as landmarks for mitochondria (**Fig. 5F, Supplemental movie 4**). Notably, we found that a significant number of PDZD8 puncta accumulate in MERCs (arrowheads in **Fig. 5G, Supplemental movie 4**). Taken together, using multiple independent approaches, our results demonstrate that PDZD8 and FKBP8 form a complex between the ER and mitochondria and the overexpression of FKBP8 at OMM increases the abundance of this protein complex at MERCs.

### **Overexpression of mitochondrial FKBP8<sup>N403K</sup> narrows the distance between ER and mitochondria at MERCs**

Cryo-electron tomography (cryo-ET) provides the resolution range of 3-50 Å that is not accessible with other techniques and, importantly, allows the quantification of ultrastructural features of MERCs in situ, in native, unfixed conditions. Using correlative cryo-light microscopy and cryo-ET, we studied the *in situ* topology of mammalian MERCs. First, we overexpressed FKBP8<sup>N403K</sup> in *Pdzd8*-Venus KI NIH3T3 cells and replicated the effect of recruiting and stabilizing PDZD8 in cells grown on cryo-EM grids (**Fig. 6A**). We then used cryo-focused ion beam (cryo-FIB) milling to generate lamellae (<200 nm-thick slice per cell) from *PDZD8*-HaloTag KI HeLa cells overexpressing FKBP8<sup>N403K</sup>-mScarlet (**Fig. 6B-E**). Cryo-fluorescence images of the lamellae overlaid on their corresponding high-resolution medium-mag TEM montage confirmed the presence of FKBP8<sup>N403K</sup>-mScarlet on all mitochondria including MERCs. Since FKBP8<sup>N403K</sup>-mScarlet overexpression significantly increased the number of MERCs in each lamella compared to control cells, we fully segmented and labelled membrane structures at 20 MERCs in the FKBP8<sup>N403K</sup> overexpression condition, and 6 MERCs in the control cells. Using surface morphometrics analysis<sup>33</sup>, we quantified ER-OMM distances at the level of a fraction of MERCs. Our cryo-ET analyses demonstrate that ER-OMM distances at any given MERCs is quite heterogeneous ranging from 10 nm to 50 nm (**Fig. 6F, Fig S6**). Moreover, an aggregate analysis for both the overexpressed and control conditions showed that overexpression of FKBP8<sup>N403K</sup> significantly ( $p < 0.0005$ , Kolmogorov-Smirnov test) shifted ER-OMM distances to shorter values with a weighted median value at 25.7 nm compared to 30.1 nm in control MERCs (**Fig. 6G**). These results suggest that overexpression of FKBP8<sup>N403K</sup>, which efficiently recruits ER-localized PDZD8 to MERCs, imposes distances shorter than 25 nm between the ER and OMM membranes at MERCs.

### **PDZD8 and FKBP8 are cooperatively required for formation of MERCs**

Our results demonstrate that PDZD8 and FKBP8 proteins form a complex at MERCs. Thus, we investigated if the interaction between PDZD8 and FKBP8 is critical for tethering the ER and mitochondria.

To measure the size of MERCS, we visualized the ER and mitochondria membranes using scanning electron microscopy (SEM) and segmented the contact sites between the two organelles. As previously reported with constitutive deletion of PDZD8 in HeLa cells,<sup>8</sup> conditional deletion of PDZD8 induced by a treatment with 4-OHT to the *Pdzd8* ff::Cre<sup>ERT2</sup> MEFs (*Pdzd8* cKO) significantly decreased the size of MERCS, defined as the fraction of OMM membranes associated with ER, compared to the vehicle-treated control isogenic MEFs (**Fig. 7A and B, Fig.S7A**). Strikingly, shRNA mediated knock-down (KD) of *Fkbp8* (validated in **Fig. S7A**) in the vehicle-treated control MEFs also significantly decreased the size of MERCS to the same extent as in conditional *Pdzd8* cKO cells (**Fig. 7A and B**). Importantly, *Fkbp8* KD in *Pdzd8* cKO MEF did not further reduce the fraction of MERCS compared to *Pdzd8* KO MEF only (**Fig. 7A and B, Pdzd8 cKO vs Pdzd8 cKO + Fkbp8 KD**). Two-way ANOVA analysis shows that there is a strong functional interaction between the effects of FKBP8 and PDZD8 loss of function regarding the size of MERCS (**Figure 7C and D**). Therefore, these results demonstrate that PDZD8 and FKBP8 tether the ER and mitochondria interdependently.

## DISCUSSION

The biology of organelle contacts has emerged as molecularly complex and highly dynamic but mediating many crucial aspects of cell physiology. Recent studies demonstrated that MERCS play key roles in Ca<sup>2+</sup> exchange between the ER and mitochondria, thereby regulating Ca<sup>2+</sup> dynamics in numerous cell types, including neurons.<sup>8</sup> In addition, MERCS play roles in lipid exchange between the ER and mitochondrial membrane, regulation of mitochondrial fission/fusion, and autophagosome biogenesis.<sup>1,3,34,35</sup> However, the molecular mechanisms underlying the formation of MERCS and other organelle contacts remain poorly understood.

We investigated the molecular mechanisms of MERCS formation by analyzing the dynamics of the ER-mitochondria tethering protein PDZD8 using endogenous tagging, single particle tracking, and identifying the partner protein on the mitochondrial side. Our results show specific PDZD8 recruitment at MERCS under endogenous conditions, that PDZD8 moves dynamically on the ER membrane and exhibits a significant slow-down near mitochondria, and using a battery of endogenous tags and biotin ligase-mediated proteomics that this tethering at the mitochondria is dependent on the OMM protein FKBP8. Overexpression of an OMM-targeted form of FKBP8 has a striking effect on recruitment of PDZD8 to the vicinity of the OMM, arguing that PDZD8-FKBP8 complex can be a powerful tether inducing MERCS. Additionally, our ultrastructural analysis suggested that the binding between FKBP8 and PDZD8 is necessary for the formation of a significant fractions of MERCS. The relatively low affinity between PDZD8 and FKBP8 was consistent with the dynamic nature of PDZD8 revealed by single particle imaging. Taken together, the molecular complex elucidated in this study revealed a novel molecular mechanism underlying the plastic contact between the ER and mitochondria.

### Dynamics and localization of PDZD8

The ER spreads throughout the cell and works as a hub exchanging a wide variety of molecules with other organelles especially through membrane contact sites. Although we demonstrated that PDZD8 is an ER protein required for the formation of MERCS, subsequent studies indicated its presence at MCS between ER-lysosome, ER-late endosome, and at the ER-late endosome-mitochondria tripartite contacts, all of which we can observe with some frequency in our data.<sup>11,20,22</sup> However, in this study, the



observations of endogenously expressed PDZD8 with confocal microscopy and CLEM revealed that the majority of PDZD8 at MCSs is present in the vicinity of mitochondria, and less so at ER-lysosomes or ER-late endosomes contacts. In addition, hotspots of PDZD8 on the mitochondria were observed in the analysis of PDZD8 dynamics using super-resolution analysis with sptPALM. The results of sptPALM showing the dynamic exchange of PDZD8 over the ER suggest that PDZD8 may be able to move rapidly between different types of MCS, as suggested for VAPB. One mechanism that could help facilitate recruitment of PDZD8 to the late endosome is its ability to directly bind to Rab7. Of note, the binding affinity of FKBP8-PDZD8 *in vitro* revealed in this study, is of the same order of magnitude as that reported for Rab7-PDZD8 *in vitro*.<sup>32</sup> Furthermore, overexpression of FKBP8 or Rab7 recruits the majority of PDZD8 to the mitochondrial or late endosome contact sites, respectively (this study and Elbaz-Alon et al.,<sup>20</sup> Guillén-Samander et al.,<sup>22</sup> and Gao et al.<sup>23</sup>). Thus, it is possible that FKBP8 and Rab7 are competing for sequestration of PDZD8 and therefore might control the balance between the areas of MERCS and ER-Lysosome contacts.

### **Potential roles of the PDZD8 complex formation in regulating FKBP8 functions**

Another important implication of this work is that the formation of MERCS via the PDZD8-FKBP8 complex could potentially explain some of the molecular mechanisms underlying the various cellular functions of FKBP8, including Ca<sup>2+</sup> import into the mitochondrial matrix,<sup>7</sup> mitophagy regulation and initiation of autophagy.<sup>36,37</sup> Intriguingly, PDZD8 is required to suppress mitophagy in drosophila neurons,<sup>12</sup> raising the possibility that the complex formation with PDZD8 inhibits FKBP8's function of initiating mitophagy. FKBP8 was also proposed to be a part of the core Hsp90 chaperone complex<sup>38,39</sup> that negatively regulates mTOR signaling pathway through interacting with mTOR complex 1 and its lysosomal regulator Rheb<sup>40,41</sup>, although several groups challenged these results.<sup>42-45</sup> Since it has been reported that PDZD8 localizes at the three-way junction among the ER, mitochondria, and lysosome, it is an interesting avenue to explore roles of the FKBP8-PDZD8 complex in regulating mTOR at the junction. FKBP8 plays other physiological roles in neural development by regulating the sonic hedgehog pathway, and in innate immune responses via the interaction with a MERCS-resident protein MAVS (Mitochondrial antiviral-signaling protein).<sup>6,7,38,46-49</sup> Thus it will be interesting to investigate if these FKBP8 roles are regulated by the complex formation with PDZD8 on MERCS.

### **Application of cryo-ET for the analysis of mammalian MERCS**

In this study, we took advantage of the increase in the number of contact sites induced by FKBP8 overexpression to develop a cryo-ET pipeline for characterization of mammalian MERCS at sub-nanometer resolution in native, unfixed, conditions. We discovered that the distances between ER and mitochondria are highly variable with a range of 10-50 nm. We were able to compare the distribution of ER-OMM distances at MERCS in control and FKBP8<sup>N403K</sup> overexpressing cells and show that ER-OMM distances are narrowed by increased formation of PDZD8-FKBP8 tethering complexes. This unprecedented high-resolution analysis of intact mammalian MERCS will pave the way for a sub-nanometer analysis of mammalian MCS in the native state.

In order to examine the ultrastructural features of large mammalian MERCS with the cryo-ET, modified approach that can image thicker lamellae (>200 nm) will need to be developed. In addition, increasing the throughput of this technique, both in sample preparation through improved robotics and in data processing through machine learning algorithms, will lead to a broader range of applications for this

technique to study the cell biology of organelle contacts.

### Limitations of the study

In this study, we focused on molecular aspects of the ER-mitochondria tethering PDZD8-FKBP8 protein complex. Our analyses were limited to various cell types studied in cultured cells. Further studies using *in vivo* systems will be required to identify the full range of functions of this novel tethering complex at MERCs. Furthermore, the results from our analyses of the PDZD8-FKBP8 complex using *in vitro* purified proteins might not precisely reflect the binding properties of this protein complex in cells, considering that VAPA and VAPB (VAPs), Protrudin, and other proteins were identified as candidate proteins included in the complex.<sup>7,20,28,50</sup> Revealing the structure and diversity of MERCs complex *in situ* and in various cell types will represent an important direction for the field.

### Acknowledgment

We thank Drs. Heike Blockus, Tommy Lewis, Seok-Kyu Kwon for their critical reading of the manuscript and members of the Hirabayashi lab for constructive discussions. We thank Drs. Yoshibumi Yamaguchi (Hokkaido University), Masato Ohtsuka (Tokai University), Masayuki Miura (The University of Tokyo), and Makoto Matsuyama (Shigei Medical Research Institute) for the kind instruction of the iGONAD method, Dr. Luke Hammond (Columbia University) for the kind instruction of fluorescence image analysis, and Drs. Satoru Takahashi, Yoko Ishida, Chieko Saito, Ikuko Koyama-Honda, and Noboru Mizushima (The University of Tokyo) for the kind instruction of the CLEM method. We thank Drs. Shigeo Okabe and Yuka Sato for the support of FE-SEM imaging. We thank Dr. Jonathon Nixon-Abell for performing pilot experiments with sptPALM of PDZD8 and assisting with establishing imaging and tracking conditions. This work was supported by JSPS KAKENHI under Grant Number 20H04898 (Y.H.), 22H05532 (Y.H.), 21J00490 (S. A-I.), 22J23099 (K.N.), AMED under Grant number JP19dm0207082 (Y.H.), JP21wm0525015 (Y.H.), SECOM Science and Technology Foundation Research grant (Y.H.), the Uehara memorial foundation research grant (Y.H.), the Naito Foundation (S. A-I.), NIH-NINDS R35 award NS127232 (F.P.), Joint Usage and Joint Research Programs by the Institute of Advanced Medical Sciences of Tokushima University (K.N., T.N., Y.S-S., Y.H., and H.K.), and The University of Tokyo WINGS-LST “Collaboration project” and “Laboratory Practice” (K.N. and Y.H.). We thank Dr. Chrisostomos Prodromou (University of Sussex) for providing the pRSETA-hFKBP8 (1-380) - Histag. pENTR4-HaloTag (w876-1) was a gift from Dr. Eric Campeau (Addgene plasmid #29644; <http://n2t.net/addgene:29644>; RRID: Addgene\_29644).

### Author contribution

Y.H. conceptualized and supervised the project. K.N., S. A-I., T.N., Y.S-S., Y.D., S.S., M.T., and Y.H. designed and performed the experiments. M.P. performed cryo-ET analysis advised by C.P., B.C., and F.P.. J.J. helped with the cryo-ET grid preparation and data processing. C.J.O. and J.L.-S. performed sptPALM analysis. K.N. performed *in vitro* analysis under the supervision of M.N. and K.T.. Y.K. and Y.G. generated *Pdzd8*-3×HA KI mice. H.K. acquired and analyzed the MS data. C.K., H-W. R, J.K.S. performed proximity labeling-MS experiment of *Pdzd8*-TurboID KI Neuro2a. K.N., S. A-I., T.N., and Y.H. wrote the manuscript with the help of the rest of the authors.

### **Declaration of interests**

The authors declare no competing interests.

## Figure Legends

### Figure 1. PDZD8 localizes in the close proximity of mitochondria, lysosome, and late endosome

(A) Diagram describing the genomic locus of *Pdzd8* in the *Pdzd8*-Venus KI NIH3T3 cell. The sequence for Venus-P2A-Neomycin resistance gene (Neo<sup>r</sup>) was knocked-in at the C-terminus of the *Pdzd8* coding sequence.

(B-E) Analyses of PDZD8 localization by immunofluorescence using *Pdzd8*-Venus KI NIH3T3 cells. The cells were stained with antibodies to GFP, to Tomm20, and to Lamp1 (B, C), or with antibodies to GFP, to OXPHOS complex, and to Rab7 (D, E). The boxed regions of the top panels are shown at higher magnification in the corresponding lower panels. Scale bars, 10  $\mu\text{m}$  or 2  $\mu\text{m}$  as indicated. Data are representative of two independent experiments. Pie charts show the percentage of endogenous PDZD8-Venus intensity overlapping with areas positive for both Tomm20 and Lamp1, Tomm20-only, Lamp1-only, or the other areas of images (C), or with areas positive for both OXPHOS and Rab7, OXPHOS -only, Rab7-only, and the other areas of images (E).

(F) Diagram describing the genomic locus of PDZD8 in the *PDZD8*-Halotag KI HeLa cell. The sequence for Halotag-P2A-Neo<sup>r</sup> was knocked-in at the C-terminus of the *PDZD8* coding sequence.

(G) Representative time-lapse images from a live-cell imaging of a *PDZD8*-HaloTag KI HeLa cell transiently transfected with an ER-marker BiP-mtagBFP2-KDEL (yellow) and an OMM-marker YFP-ActA (cyan), and treated with Janelia Fluor 549 dye (magenta) for labeling endogenous PDZD8-HaloTag. The arrowheads indicate the puncta of endo-PDZD8-HaloTag colocalizing with mitochondria and ER. Note that the PDZD8 dot moves together with the ER-mitochondria contact site.

### Figure 2. PDZD8 shows specific interactions at both mitochondria and at other organelles in the same cells by high-speed single molecule tracking

(A) Diffraction-limited imaging of the ER (cyan) and the mitochondria (red) in the periphery of a representative COS7 cell with the simultaneously measured likelihood of finding a PDZD8 molecule in a one-minute window. The locations of the mitochondria in the probability map are indicated with dotted white lines. Boxes correspond to the mitochondria- (red) or non-mitochondria- (yellow) contact sites in (C) and (D).

(B) Plots of the distance of individual PDZD8 molecules shown in different colors from the center of example contact sites over time. Plots are from MitoCS 2 (top panel) or OtherCS CS3 (bottom panel) shown in (A). Note the long stretches where single molecules remain engaged in the contact site.

(C) Zooms of the MitoCS indicated in (A) showing individual PDZD8 trajectories engaging with the contact site and the associated PDZD8 probability density. Dotted lines indicate contact site boundaries as used for subsequent analysis.

(D) Zooms of OtherCS in (A), dotted lines represent the contact site boundary as used in subsequent analysis.

(E) PDZD8 shows reduced diffusion within both classes of contact sites as compared to freely diffusing in the surrounding ER.

(F) Sizes of MitoCS are significantly larger than those of OtherCS in the same cells.

(G) PDZD8 dwell times in individual MitoCS and OtherCS. Inset shows the leaving frequency ( $k_{\text{out}}$ ) of individual PDZD8 molecules from the MitoCS and OtherCS.

### Figure 3. FKBP8 forms a protein complex with PDZD8

(A) Scheme of the immunoprecipitation and LC-MS/MS analysis using the *Pdzd8*-3×HA KI mice neocortices. The immunoprecipitates from the neocortices of *Pdzd8*-3×HA mice or the control littermates using an anti-HA antibody were subjected to the LC-MS/MS analysis.

(B) Diagram describing the genomic sequence of *Pdzd8*-3×HA KI mice. The sequence of a 3×HA tag was knocked-in at the C-terminus of the *Pdzd8* coding sequence.

(C) Volcano plot of proteins differentially binding to the PDZD8-3×HA. FKBP8 is labeled in red. Protrudin and VAPA, which have been previously reported to interact with PDZD8, are labeled in blue. The plot represents data from three biological replicates.

(D) Scheme of labeling proteins in the vicinity of endogenous PDZD8. A Biotin ligase TurboID fused to PDZD8 generates biotin-5'-AMP from biotin and ATP. The biotin-5'-AMP can covalently bind to proteins located within about 20 nm of endogenously expressed PDZD8-TurboID. After tryptic digestion, the biotinylated peptides were enriched using tamaritin 2-REV beads and subjected to the LC-MS/MS analysis.

(E) Diagram describing the genomic sequence of the PDZD8-TurboID KI HeLa cell. The sequence of TurboID-P2A-Neo<sup>r</sup> was knocked-in at the C-terminus of the PDZD8 coding sequence.

(F) Volcano plot of proteins differentially biotinylated with biotin in the PDZD8-TurboID KI HeLa cell. FKBP8 is labeled in red. Protrudin and VAPA, which have been previously reported to interact with PDZD8, are labeled in blue. The volcano plot represents three biological replicates.

(G) Numbers of proteins highly enriched in the IP-MS (C) and TurboID-MS (F) are shown in a Venn diagram. The highly enriched proteins were selected according to the following criteria:  $\log_2$  (fold change) > 1 and  $-\log_{10}$  (p-value) > 1 for IP-MS and  $\log_2$  (fold change) > 3,  $-\log_{10}$  (p-value) > 1.25 for TurboID-MS. 12 proteins are commonly found in the two proteomes. Note that FKBP8 is the only protein annotated with mitochondrial localization.

(H-I) Analysis of the interaction between endogenous FKBP8 and endogenous PDZD8-3×HA from the mouse neocortex (H), or endogenous PDZD8-Venus from NIH3T3 cells. Extracts from neocortex in *Pdzd8*-3×HA KI mouse (H) or *Pdzd8*-Venus KI NIH3T3 cells (I) were subjected to immunoprecipitation (IP) with antibodies to HA or GFP respectively. The resulting precipitates as well as the original tissue extracts (Total) were subjected to immunoblot analysis with antibodies to FKBP8, VAPA, MFN2, HA (H), GFP (I), and  $\beta$ -actin (I).

(J) Immunofluorescence analysis of PDZD8-HaloTag KI HeLa cells. The cells were treated with 200 nM of Janelia Fluor 549 for 20 hours and then stained with antibodies to FKBP8 and to Tomm20. The boxed regions of the top panels are shown at higher magnification in the corresponding lower panels. Arrowheads indicate PDZD8 colocalized both with FKBP8 and Tomm20. Scale bars, 5  $\mu$ m (original) or 1  $\mu$ m (magnified).

(K) The ratios of FKBP8 intensity on or outside (off) the mitochondria were determined for images obtained as described in (J). Error bar is  $\pm$  s.e.m. of nine cells from two independent experiments. The average of three cytoplasmic regions cropped from each of the nine cells were used for the analysis.

(L) The percentage of PDZD8 puncta that overlaps with FKBP8 puncta was determined for images as in (J). PDZD8 dots on mitochondria ("on mito") were defined as those that completely overlap with mitochondria, and PDZD8 dots off mitochondria ("off mito") otherwise. Overlaps on mito or off mito were calculated by the number of puncta of PDZD8 on mito or off mito that overlap with FKBP8 divided by the total number of PDZD8 on mito or off mito respectively. Three cropped images of cytoplasmic areas per

cell were created from 9 cells and used in the calculation. The scrambled images of FKBP8 were created by rotating original images at 180 degrees. Data are means  $\pm$  s.e.m. of 9 cells from two independent experiments. One-way repeated measures ANOVA and Tukey's multiple comparisons test were used to test statistical significance. \*\*\*\* $P < 0.0001$ , \* $P < 0.05$ , ns, not significant.

(M) The means of PDZD8 intensity in the FKBP8-present or FKBP8-absent area on mitochondria were determined for images as in (J). Data are means  $\pm$  s.e.m. of 9 cells from two independent experiments. Paired t-test was used to test statistical significance. \*\* $P < 0.01$ .

#### Figure 4. PDZD8 directly binds to FKBP8 via its SMP domain

(A) Sensorgrams of SPR assay. Recombinant human PDZD8 (1,28-) - FLAG was immobilized to the sensor chip and FKBP8 (1-380) - Histag with indicated concentrations were injected.

(B) SPR responses in the equilibrium ( $R_{eq}$ ) are plotted against FKBP8 concentration. The plot of  $R_{eq}$  versus FKBP8 concentration was fitted to the monovalent binding model to determine  $K_D$  values.

(C) Schematic diagram of the mutants of PDZD8 deleted with various domains. TM; Transmembrane, SMP; Synaptotagmin-like mitochondrial-lipid-binding, C2n; N-terminal sequence of C2 domain, PDZ; PDZ domain, C2c; C-terminal sequence of C2 domain, C1; C1 domain, CC; coiled-coil region.

(D) Schematic diagram for generating tamoxifen-inducible *Pdzd8* conditional knock-out cell lines (*Pdzd8* f/f::Cre<sup>ERT2</sup> MEFs).

(E) *Pdzd8* f/f::Cre<sup>ERT2</sup> MEFs expressing a series of deletion mutants of PDZD8-3×FLAG shown in (C) and HA-FKBP8 were treated with 1  $\mu$ M 4-hydroxy tamoxifen (4-OHT) and cell extracts were immunoprecipitated with anti-HA antibody. Western Blotting was performed with anti-HA antibody and anti-FLAG antibody.

(F) GST-Pulldown assay from the mixture of recombinant GST - Thrombin cleavage site - human PDZD8 (1, 28-506) - HA and recombinant human FKBP8 (1-380) - Histag *in vitro*. FKBP8 - Histag was isolated only with the GST-beads incubated with GST- PDZD8 (1, 28-506) – HA.

#### Figure 5. Overexpression of FKBP8 recruits vast majority of PDZD8 to the mitochondrial proximity

(A) Immunofluorescence analysis of *Pdzd8*-Venus KI NIH3T3 cells overexpressing HA-FKBP8<sup>N403K</sup>. The cells were transfected with the control plasmid (upper two rows) or plasmid coding HA-FKBP8<sup>N403K</sup> (bottom two rows), and stained with antibodies to GFP, Tomm20, and HA for visualizing endogenous PDZD8-Venus (yellow), mitochondrial outer membrane (magenta) and FKBP8<sup>N403K</sup> (cyan), respectively. The areas marked with rectangles are shown at a higher magnification in the lower panels. The mitochondria in the HA-FKBP8<sup>N403K</sup> overexpressing cells are coated with PDZD8 dots. Scale bar: 10  $\mu$ m (original), 2  $\mu$ m (magnified).

(B) The representative scatter plots of the fluorescence intensity of endogenous PDZD8-Venus and Tomm20. Note that the fluorescence intensity of endogenous PDZD8-Venus is correlated with that of Tomm20 in the HA-FKBP8<sup>N403K</sup> OE cell rather than the control cell.

(C) Pearson's correlation coefficients between endogenous PDZD8-Venus and Tomm20. Bars are the mean  $\pm$  s.e.m. (n = 26, 31 cells for the control and HA-FKBP8<sup>N403K</sup> overexpressing cells from three independent experiments). Statistical analysis was performed using Welch's t-test: \*\*\*\* $P < 0.0001$ .

(D) Quantification of the fluorescence intensity of endogenous PDZD8-Venus amplified by anti-GFP antibodies. Bars are the mean  $\pm$  s.e.m. (n = 63, 58 cells for the control and HA-FKBP8<sup>N403K</sup> overexpressing cells from two independent experiments). Statistical analysis was performed using

Welch's t-test: \*\*\*\*P < 0.0001.

(E-G) Correlative light and electron microscopy (CLEM) analysis in a *PDZD8*-HaloTag KI HeLa cell. Cells overexpressing with Venus-FKBP8<sup>N403K</sup> were treated with 200 nM of JF549 for 20 hours and then fixed cells were observed by a confocal microscope. After that, ultra-thin sections (50 nm thick) were created and observed in a field emission scanning electron microscope (FE-SEM). Electron micrographs of the serial 8 slices were corresponding to an optical section of fluorescence images. Segmentations and 3-dimensional (3D) reconstructions of mitochondria and the ER within 25 nm of mitochondria (MERCs) in electron micrographs were shown in (E). 3D reconstruction from electron micrographs (shown as "EM") were merged with fluorescence images (shown as "LM") in (F). The z projection of mitochondria and MERCs in EM was overlaid with fluorescence images in (G). Arrowheads indicate PDZD8 puncta that localizes to MERCs.

### Figure 6. High-resolution analysis of membrane morphology at MERCs using cryo-ET

(A) Overexpression of FKBP8<sup>N403K</sup> increases the intensity and the abundance of the PDZD8-Venus puncta. In cryogenic temperatures, autofluorescence of the NIH3T3 cells in the green channel is strong, hence the presence of puncta in the control cells. The Venus fluorophore also emits light in the red channel.

(B-E) For the cryo-ET analysis, FKBP8<sup>N403K</sup>-mScarlet overexpression (OE) was used to increase the number of MERCs captured in cryo-FIB milled lamellae. An SEM image of a target cell before Cryo-FIB milling is shown (B). Cryo-Fluorescence imaging of lamellae confirmed the presence of FKBP8<sup>N403K</sup>-mScarlet on all the mitochondria (C). Using medium-mag high-resolution TEM montages of the lamellae, MERCs were targeted for high-resolution tilt series acquisition (D). 80 tomograms containing MERCs were obtained for the OE condition (of which 20 were fully segmented and labelled), and 10 tomograms containing MERCs were obtained for the control (of which 6 were fully segmented and labelled). Two representative tomograms from the OE condition corresponding to the arrows in panel D are shown (E). (F) Surface morphometrics analysis was used to calculate the ER-OMM distance at MERCs. The distances are shown as a heatmap. Mammalian MERCs show a great deal of heterogeneity in their membrane ultra-structure.

(G) Aggregate analysis of the area-weighted ER-OMM distance histogram shows a shift to smaller distances in the overexpression condition compared to the control.

### Figure 7. PDZD8 and FKBP8 tether the ER and mitochondria cooperatively

(A) Representative electron micrographs of *Pdzd8* f/f::Cre<sup>ERT2</sup> MEFs infected with lentivirus carrying shControl or shFKBP8, and treated with or without 0.5 μM 4-OHT. MERCs (yellow arrowheads) were more frequently observed in the Control cells than in *Pdzd8* cKO, *Fkbp8* KD, and *Pdzd8* cKO + *Fkbp8* KD cells. Scale bar: 200 nm.

(B) Quantification of the MERCs length normalized by the mitochondrial perimeter. Bars are the mean ± SEM (n = 33, 29, 39, 34 cells from two independent experiments for the control, *Pdzd8* cKO, *Fkbp8* KD, and *Pdzd8* cKO + *Fkbp8* KD cells, respectively). Statistical analysis was performed using Ordinary two-way ANOVA and Tukey's multiple comparisons tests: \*\*p < 0.01; \*\*\*p < 0.001; ns: not significant.

(C) The interaction plot corresponding to (B). Dots show the mean of each condition.

(D) The results of the two-way ANOVA test. The low (< 0.01) variation of the interaction shows that PDZD8 and FKBP8 cooperatively affect the areas of MERCs.

## STAR★Methods

### KEY RESOURCES TABLE

| REAGENT or RESOURCE                                  | SOURCE                            | IDENTIFIER          |
|------------------------------------------------------|-----------------------------------|---------------------|
| <b>Antibodies</b>                                    |                                   |                     |
| anti-Tomm20                                          | Abcam                             | Cat# ab78547        |
| anti-LAMP1                                           | BD Bioscience                     | Cat# 553792         |
| anti-GFP                                             | Nacalai                           | Cat# 04404-84       |
| anti-GFP                                             | Invitrogen                        | Cat# A-11120        |
| anti-Rab7                                            | Cell Signaling Technology         | Cat# 9367           |
| anti-OXPHOS complex                                  | Invitrogen                        | Cat# 45-8099        |
| anti-FKBP8                                           | R and D systems                   | Cat# MAB3580        |
| anti-HA-tag                                          | Cell Signaling Technology         | Cat# 3724           |
| anti-HA-tag                                          | BioLegend                         | Cat# 16B12          |
| anti-PDZD8                                           | Hirabayashi et al. <sup>8</sup>   | N/A                 |
| anti-VAPA                                            | Bethyl laboratories               | Cat# A304-366A      |
| anti-Mfn2                                            | Abcam                             | Cat# ab56889        |
| anti-β-actin                                         | Cell Signaling Technology         | Cat# 4967           |
| anti-FLAG (M2)                                       | Sigma-Aldrich                     | Cat# F1804          |
| anti-α-tubulin                                       | Sigma-Aldrich                     | Cat# T6188          |
| anti-GFP                                             | Medical & Biological Laboratories | Cat# 598            |
| anti-His-tag                                         | Medical & Biological Laboratories | Cat# D291-3S        |
| anti-v5                                              | Abcam                             | ab27671             |
| <b>Bacterial and virus strains</b>                   |                                   |                     |
| BL21(DE3) Competent Cells                            | Merck                             | Cat# 69450          |
| OverExpress C43(DE3) Chem Comp Cells                 | Lucigen                           | Cat# 60446-1        |
| Lentivirus FUW promoter Cre-ERT2                     | This paper                        | N/A                 |
| Lentivirus LKO promoter shControl                    | This paper                        | N/A                 |
| Lentivirus LKO promoter shFKBP8                      | This paper                        | N/A                 |
| <b>Chemicals, peptides, and recombinant proteins</b> |                                   |                     |
| Dulbecco's Modified Eagle's Medium (DMEM)            | Sigma-Aldrich                     | Cat# D6429          |
| Fetal Bovine Serum (FBS)                             | Biowest                           | Cat# S1760-500      |
| Fetal Bovine Serum (FBS)                             | MP Biomedicals                    | Cat# 2917346        |
| Penicillin-Streptomycin                              | Gibco                             | Cat# 15140-122      |
| cOmplete Mini Protease Inhibitor Cocktail            | Roche                             | Cat# 11836153001    |
| cOmplete Mini EDTA-free Protease Inhibitor Cocktail  | Roche                             | Cat# 11836170001    |
| PhosSTOP                                             | Roche                             | Cat# 4906845001     |
| Benzonase                                            | Sigma-Aldrich                     | Cat# E8263          |
| Sera-Mag SpeedBeads Protein A/G                      | Cytiva                            | Cat# 17152104011150 |



|                                                          |                                         |                   |
|----------------------------------------------------------|-----------------------------------------|-------------------|
| Dynabeads ProteinA                                       | Thermo Fisher Scientific                | Cat# 10001D       |
| Bovine Serum Albumin (BSA)                               | Sigma-Aldrich                           | Cat# A2153        |
| Paraformaldehyde                                         | Electron Microscopy Sciences            | Cat# 15710        |
| Glutaraldehyde                                           | Electron Microscopy Sciences            | Cat# 16620-P      |
| Osmium tetroxide                                         | Electron Microscopy Science             | Cat# 19150        |
| Sodium Dihydrogenphosphate Dihydrate                     | Fujifilm Wako pure chemical corporation | Cat# 193-16515    |
| Disodium Hydrogenphosphate                               | Fujifilm Wako pure chemical corporation | Cat# 197-02865    |
| Potassium Hexacyanoferrate(III)                          | Fujifilm Wako pure chemical corporation | Cat# 167-03722    |
| Thiocarbohydrazide                                       | Sigma-Aldrich                           | Cat# 223220       |
| Lead(II) nitrate                                         | Sigma-Aldrich                           | Cat# 203580       |
| L-Aspartic acid                                          | Sigma-Aldrich                           | Cat# A9256        |
| Agarose Low Melting Point                                | MP Biomedicals                          | Cat# AGAL0050     |
| Butyl 2,3-epoxypropyl ether                              | Fujifilm Wako pure chemical corporation | Cat# 022-08085    |
| MNA                                                      | Oken                                    | Cat# 02-1006      |
| Epok812                                                  | Oken                                    | Cat# 02-1002      |
| DDSA                                                     | Oken                                    | Cat# 02-1004      |
| DMP-30                                                   | Oken                                    | Cat# 02-1008      |
| LX-112                                                   | Ladd Research Industries                | Cat# 21310        |
| BDMA                                                     | Ladd Research Industries                | Cat# 21365        |
| NMA                                                      | Ladd Research Industries                | Cat# 21350        |
| DDSA                                                     | Ladd Research Industries                | Cat# 21340        |
| FuGENE® HD Transfection Reagent                          | Promega                                 | Cat# E2311        |
| TALON® Metal Affinity Resin                              | Takara                                  | Cat# 635501       |
| Glutathione Sepharose 4B 10 ml                           | Cytiva                                  | Cat# 17075601     |
| DDDDK-tagged Protein PURIFICATION GEL                    | MBL                                     | Cat# 3328R        |
| Thrombin Protease                                        | Cytiva                                  | Cat# GE27-0846-01 |
| Prolong Gold antifade reagent                            | Thermo Fisher Scientific                | Cat# P36934       |
| Janelia Fluor (JF) 549                                   | Promega                                 | Cat# GA1110       |
| Photoactivatable Janelia Fluor (PA-JF646) HaloTag Ligand | HHMI Janelia Open Resource Program      | N/A               |
| trypsin/Lys-C mix                                        | Promega                                 | Cat# V5072        |
| Alt-R® S.p. Cas9 Nuclease V3                             | IDT                                     | Cat# 1081059      |
| Alt-R® CRISPR-Cas9 tracrRNA                              | IDT                                     | Cat# 1072534      |

|                                                                         |                                         |                |
|-------------------------------------------------------------------------|-----------------------------------------|----------------|
| FastGreen                                                               | Fujifilm Wako pure chemical corporation | Cat# 061-00031 |
| OPTI-MEM                                                                | Thermo Fisher Scientific                | Cat# 11058021  |
| Corning® Matrigel® Growth Factor Reduced (GFR) Basement Membrane Matrix | Corning                                 | Cat# 354230    |
| Silencer Select Negative Control No. 2 siRNA                            | Thermo Fisher Scientific                | Cat# 4390846   |
| Silencer Select siRNA FKBP8                                             | Thermo Fisher Scientific                | Cat# s24386    |
| Lipofectamine RNAiMAX transfection reagent                              | Thermo Fisher Scientific                | Cat# 13778030  |
| MagCapture HP Tamavidin 2-REV beads                                     | Fujifilm Wako pure chemical corporation | Cat# 133-18611 |
| Pierce Trypsin Protease, MS Grade                                       | Thermo Fisher Scientific                | Cat# 90058     |
| ExpiFectamine 293 Transfection Kit                                      | Thermo Fisher Scientific                | Cat# A14525    |
| High tolerance round cover glass, #1.5 thickness, 25 mm                 | Warner Scientific                       | Cat# CS-25R17  |
| Critical commercial assays                                              |                                         |                |
| Experimental models: Cell lines                                         |                                         |                |
| NIH3T3                                                                  | BRC                                     | RCB2767        |
| 293T                                                                    | BRC                                     | RCB2202        |
| HeLa                                                                    | Dr. Yukiko Gotoh Laboratory             | N/A            |
| <i>Pdzd8</i> f/f:: CreERT2 MEFs                                         | This paper                              | N/A            |
| Neuro2a                                                                 | ATCC                                    | CCL-131        |
| <i>Pdzd8</i> -Venus KI NIH3T3                                           | This paper                              | N/A            |
| <i>PDZD8</i> -v5-TurboID KI HeLa                                        | This paper                              | N/A            |
| <i>Pdzd8</i> -v5-TurboID KI Neuro2a                                     | This paper                              | N/A            |
| <i>PDZD8</i> -Halotag KI HeLa                                           | This paper                              | N/A            |
| Expi293 cells                                                           | Thermo Fisher Scientific                | Cat# A14635    |
| COS7                                                                    | ATCC                                    | CRL-1651       |
| Experimental models: Organisms/strains                                  |                                         |                |
| Mouse: <i>Pdzd8</i> flox/flox                                           | O'Hare et al. <sup>13</sup>             | N/A            |
| Mouse: <i>Pdzd8</i> -3×HA KI                                            | This paper                              | N/A            |
| Mouse: Jcl:ICR                                                          | Japan SLC, Inc.                         | N/A            |
| Oligonucleotides                                                        |                                         |                |
| See the Table S3                                                        |                                         |                |
| Recombinant DNA                                                         |                                         |                |
| See the Table S3                                                        |                                         |                |
| Software and algorithms                                                 |                                         |                |

|                      |                                  |                                                                                                                                                                                                                                       |
|----------------------|----------------------------------|---------------------------------------------------------------------------------------------------------------------------------------------------------------------------------------------------------------------------------------|
| ImageJ (Fiji)        | NIH                              | <a href="https://imagej.nih.gov/ij/">https://imagej.nih.gov/ij/</a>                                                                                                                                                                   |
| Graphpad Prism       | Graphpad                         | <a href="https://www.graphpad.com/">https://www.graphpad.com/</a>                                                                                                                                                                     |
| Python               | Python Software Foundation       | <a href="https://www.python.org/">https://www.python.org/</a>                                                                                                                                                                         |
| PHILOW               | Suga et al. <sup>51</sup>        | <a href="https://github.com/neurobiology-ut/PHILOW">https://github.com/neurobiology-ut/PHILOW</a>                                                                                                                                     |
| NIS-elements         | NIKON                            | <a href="https://www.microscope.healthcare.nikon.com/products/software/nis-elements">https://www.microscope.healthcare.nikon.com/products/software/nis-elements</a>                                                                   |
| Imaris version 9.6.0 | Bitplane                         | <a href="https://imaris.oxinst.com/packages">https://imaris.oxinst.com/packages</a>                                                                                                                                                   |
| Empanada             | Conrad and Narayan <sup>52</sup> | <a href="https://www.napari-hub.org/plugins/empanada-napari">https://www.napari-hub.org/plugins/empanada-napari</a>                                                                                                                   |
| CRISPR Design tool   | Horizon Discovery Ltd.           | <a href="https://horizondiscovery.com/ordering-and-calculation-tools/crispr-design-tool">https://horizondiscovery.com/ordering-and-calculation-tools/crispr-design-tool</a>                                                           |
| Matlab               | Mathworks                        | <a href="https://www.mathworks.com/products/matlab.html">https://www.mathworks.com/products/matlab.html</a>                                                                                                                           |
| Maps Software        | Thermo Fisher Scientific         | <a href="https://www.thermo-fisher.com/jp/ja/home/electron-microscopy/products/software-em-3d-vis/maps-software.html">https://www.thermo-fisher.com/jp/ja/home/electron-microscopy/products/software-em-3d-vis/maps-software.html</a> |

## RESOURCE AVAILABILITY

### Lead Contact

Further information and requests for resources and reagents should be directed to and will be fulfilled by the Lead Contact, Yusuke Hirabayashi ([hirabayashi@chembio.t.u-tokyo.ac.jp](mailto:hirabayashi@chembio.t.u-tokyo.ac.jp)).

### Materials Availability

The reagents produced in this study can be obtained from the Lead Contact upon request.

### Data and Code Availability

Raw data from all Figures were deposited on Mendeley at doi:10.17632/rzx59ntvt5.1.

## EXPERIMENTAL MODEL AND SUBJECT DETAILS

### Materials & Methods

#### ***Cell culture and plasmid transfection***

NIH3T3 cells, Neuro2a cells, HeLa cells, and MEFs were maintained with Dulbecco's Modified Eagle Medium (DMEM, Sigma-Aldrich, catalog no. D6429) supplemented with 10% FBS (MP Biomedicals, catalog no. 2917346), and 1% Penicillin-Streptomycin (Gibco, catalog no. 15140-122) at 37°C under 5% CO<sub>2</sub>. COS7 cells were maintained in phenol red-free DMEM (Corning, catalog no. 25200114) supplemented with 10 % FBS (Corning, catalog no. 35-011-CV), 1% Penicillin-Streptomycin, and 1% L-glutamine (Corning, catalog no. 25-005-CI). NIH3T3 cells, Neuro2a cells and MEFs were transfected with plasmids by polyethyleneimine (Polysciences). HeLa cells were transfected with plasmids by Lipofectamine LTX reagent with Plus reagent (Thermo Fisher) and Lipofectamine 2000 transfection reagent (Thermo Fisher), or with siRNAs by Lipofectamine RNAiMAX transfection reagent (Thermo Fisher). All DNA plasmids used in this work are listed in Supplemental Table 3.

#### ***Animals***

All animals were maintained and studied according to protocols approved by the Animal Care and Use Committee of The University of Tokyo.

#### ***Generation of *Pdzd8*-Venus/*TurboID*/*Halotag* knock-in cell lines***

*Pdzd8*-Venus KI NIH3T3, *Pdzd8*-TurboID KI Neuro2a cells, *PDZD8*-TurboID KI HeLa cells, and *PDZD8*-Halotag KI HeLa cells are generated as previously described.<sup>8</sup> The plasmids pCAG-mPDZD8\_cterm-Venus-P2A-Neo for *Pdzd8*-Venus KI NIH3T3 cells, pCAG-mPDZD8\_cterm-v5-TurboID-P2A-Neo for *Pdzd8*-TurboID KI Neuro2a cells, pCAG-hPDZD8\_cterm-v5-TurboID-P2A-Neo for *PDZD8*-TurboID KI HeLa cells, and pCAG-hPDZD8\_cterm-HaloTag-P2A-Neo for *PDZD8*-HaloTag KI HeLa cells were used as donor vectors respectively.

#### ***Generation of *Pdzd8*-Venus and HA-*Fkbp8* double knock-in cell lines***

For CRISPR-Cas9 plasmid, CRISPR guide RNA that targets the region prior to *Fkbp8* start codon was designed using CRISPR Design tool (Horizon Discovery Ltd.) and cloned into pSpCas9(BB)-2A-Puro (PX459) V2.0 (Addgene plasmid # 62988) as previously described.<sup>53</sup> The donor oligonucleotides containing the 5' arm sequence, the sequence of HA tag and the 3' arm sequence (5' - TCC CCG AGC CGC AGG GCC AGT TCC TGA TCC CAG CAG CAT GTA CCC ATA CGA TGT TCC AGA TTA CGC TGC GTC TTG GGC TGA GCC

CTC TGA GCC TGC TGC CCT - 3') were obtained from Eurofins Genomics. *Pdzd8*-Venus KI NIH3T3 cells were transfected with CRISPR-Cas9 plasmid and the donor oligonucleotides by polyethylenimine.

### **Generation of tamoxifen-inducible *Pdzd8* conditional KO cell lines (*Pdzd8* f/f::Cre<sup>ERT2</sup> MEFs)**

Mouse embryos were dissected from anesthetized females at embryonic day 13.5. The embryos were minced, and after treatment with 0.25% trypsin (Gibco), 50 µg/mL of DNaseI (Merck) and 0.67 mg/mL of Hyaluronidase (Merck) in PBS for 20 minutes, the cells of the resulting suspension were plated onto 100-mm culture dishes and maintained in culture medium for 4 days. The cells were then immortalized by transfecting with plasmids encoding simian virus 40 (SV40) large T antigen (pMK16\_SV40 T ori (-)<sup>54</sup>). After that, the cells were infected with lentivirus carrying Cre-ERT2 and single cell clones were obtained using a limiting dilution in 96-well plates.

### **Generation of *Pdzd8*-3×HA knock-in mice**

CRISPR/Cas9-mediated genome editing was performed using the iGONAD method as previously reported.<sup>55</sup> Briefly, 2- to 3-month old female mice (Jcl:ICR, CLEA Japan) were mated with male mice the day before electroporation. The female mice with virginal plug were used for iGONAD at embryonic day 0.75. Genome editing solution was prepared with 1 mg/ml Cas9 protein (IDT, 1081059), 30 mM crRNA (annealed with tracrRNA, IDT, 1072534), 2 mg/ml ssODN (IDT, Ultramer DNA Oligo, standard desalting), and FastGreen (Fujifilm Wako, 061-00031) in OPTI-MEM (Thermo Fisher Scientific, 11058021). The oviducts of the female mice were exposed and injected with the solution through microcapillary injection. Oviduct electroporation was performed using NEPA21 and CUY652P2.5x4 (NEPA gene) with the following protocol: three poring pulses (50 V, 5 msec, 50 msec interval, and 10% decay [±pulse orientation]) and three transfer pulses (10 V, 50 msec, 50 msec interval, and 40% decay [±pulse orientation]). After electroporation, the oviducts were returned to their original position. The sequences of crRNA and ssODN were as follows: crRNA, 5' - ATT GAT TAC ACT GAC TCA GA - 3' and ssODN, 5' - AGC CAT TCA GCA ACA TTT CCG ATG ACT TGT TCG GCC CAT CTG AGT CAG TGT ACC CAT ACG ATG TTC CAG ATT ACG CTG GCT ATC CCT ATG ACG TCC CGG ACT ATG CAG GAT CCT ATC CAT ATG ACG TTC CAG ATT ACG CTG TTT AAT CAA TAA GCT ATT TCA ACT TTC ACA TGG ATG GAG GGG ACA AGA CGT A - 3'.

### **Abs**

Primary Abs for immunostaining; anti-Tomm20 (Abcam, ab78547; 1:500), anti-LAMP1 (BD Bioscience, 553792; 1:500), rat anti-GFP (Nacalai, 04404-84; 1:200-1:500), mouse anti-GFP (Invitrogen, A-11120; 1:1,000), anti-Rab7 (Cell Signaling Technology, 9367; 1:100), anti-OXPHOS complex (Invitrogen, 45-8099; 1:200), anti-FKBP8 (R and D systems, MAB3580; 1:500), anti-HA-tag (Cell Signaling Technology, 3724; 1:200), anti-HA-tag (BioLegend, 16B12; 1:500).

Primary Abs for immunoblotting; anti-PDZD8 (Hirabayashi et al.<sup>8</sup>; 1:500), anti-HA-tag (BioLegend, 901501; 1:2,000), anti-FKBP8 (R and D systems, MAB3580; 1:500), anti-VAPA (Bethyl laboratories, A304-366A; 1:1,000), anti-Mfn2 (Abcam, ab56889; 1:1,000), anti-β-actin (Cell Signaling Technology, 4967; 1:500), anti-FLAG (M2) (Sigma-Aldrich, F1804; 1:1,000), anti-α-tubulin (Sigma-Aldrich, T6188; 1:1,000), anti-GFP (Medical & Biological Laboratories, 598; 1:1,000), anti-His-tag (Medical & Biological Laboratories, D291-3S; 1:1,000), and anti-v5 (Abcam, ab27671; 1:500).

### **Immunoblotting**

Cells were lysed with a solution containing 20 mM Hepes-NaOH (pH 7.5), 150 mM NaCl, 0.25 M sucrose, 1 mM EDTA, 0.1% SDS, 0.5% Sodium deoxycholate, 0.5% NP-40, 1 mM Na<sub>3</sub>VO<sub>4</sub>, cOmplete Mini Protease Inhibitor Cocktail (Roche) and Benzonase (25 U/ml). Insoluble pellets and supernatants were separated by

centrifugation at 15,000 × g at 4°C for 15 minutes. The supernatants were boiled with 1 × Laemmli's sample buffer containing 10% mercaptoethanol at 98°C for 5 minutes. The cell lysates were fractionated by SDS-PAGE on a 10% gel or a 4-15% gradient gel (Bio-rad) and the separated proteins were transferred to a polyvinylidene difluoride membrane (Merck). The membrane was incubated first with primary Abs for 24 hours at 4°C and then with HRP-conjugated secondary Abs (GE Healthcare) for 1 hour at room temperature. After a wash with TBS-T (50 mM Tris-HCl (pH 8), 150 mM NaCl, and 0.05% Tween 20), the membrane was processed for detection of peroxidase activity with chemiluminescence reagents (100 mM Tris-HCl (pH 8.5), 1.25 mM Luminol, 0.2 mM P-Coumaric Acid, 0.01 % H<sub>2</sub>O<sub>2</sub>) and the signals were detected by Image Quant LAS4000 instrument (GE Healthcare).

### **Coimmunoprecipitation analysis**

#### **Cross-linked IP in *Pdzd8*-3×HA knock-in mouse brain**

*Pdzd8*-3×HA knock-in mice and control littermates at postnatal 10 days were put to sleep using medetomidine hydrochloride (Domitor, Nippon zenyaku kogyo, 0.75 mg/kg), midazolam (Sandoz, 4 mg/kg) and butorphanol (Vetorphale, Meiji Seika Pharma Co., Ltd, 5 mg/kg). Pups were then put on the ice for 5 minutes and exsanguinated by terminal intracardial perfusion with ice-cold 2% paraformaldehyde (Merck) in phosphate-buffered saline (PBS). The neocortex was then removed and sonicated five times for 30 seconds with ice-cold lysis buffer (50 mM Tris-HCl (pH 7.5), 1 mM EDTA, 0.2 % Triton-X100, PhosSTOP phosphatase inhibitor (Roche) and cOmplete protease inhibitor cocktail (Roche)). Insoluble pellets and supernatants were separated by centrifugation at 15000 × g at 4°C for 15 minutes. The supernatants were incubated in rotation at 4°C for 20 hours with a protein complex of anti-HA antibody (Cell signaling technology, C29F4) and Sera-Mag SpeedBeads Protein A/G (Cytiva). After the rotation, beads were washed three times with TBS buffer. The immunoprecipitates were eluted from beads by incubating in 2 × Laemmli's sample buffer containing 10% mercaptoethanol at 98°C for 10 minutes and then subjected to immunoblotting. Total fraction samples were prepared using 2% of the cell extracts.

#### **Cross-linked IP in *Pdzd8*-Venus knock-in NIH3T3 cell**

Cells were fixed with 0.1% PFA for 10 minutes at room temperature, and 100 mM glycine-NaOH was treated for 4 minutes at RT. Cells were washed twice with ice-cold PBS and lysed with ice-cold lysis buffer (50 mM Tris-HCl, pH 7.4, with 150 mM NaCl, 1 mM EDTA, 0.2% Triton-X100, 1 mM Na<sub>3</sub>VO<sub>4</sub> and cOmplete Mini Protease Inhibitor Cocktail (Roche)). Cell extracts were incubated on ice for 15 minutes, then insoluble pellets and supernatants were separated by centrifugation at 15,000 × g at 4°C for 15 minutes. The supernatants were incubated in rotation at 4°C for 20 hours with a protein complex of anti-GFP antibody (MBL) and Dynabeads Protein A (Thermo Fisher Scientific). After the rotation, beads were washed three times with TBS buffer. The immunoprecipitates were eluted from beads by incubating in 2×Laemmli's sample buffer, then mercaptoethanol was added at the final concentration of 9%. Samples were boiled at 98°C for 5 minutes and then subjected to immunoblotting. Total fraction samples were prepared using 1.5% of the cell extracts.

#### **IP in PDZD8-3×FLAG and HA-FKBP8 overexpressing cell**

*Pdzd8* f/f::Cre<sup>ERT2</sup> MEFs were treated with 1 μM 4-OH tamoxifen for 24 hours and then transfected with plasmids encoding 3×FLAG-tagged full length PDZD8/deletion mutants and HA-tagged FKBP8. 24 hours post transfection cells were lysed with ice-cold lysis buffer (50 mM Tris-HCl (pH 7.5), 1 mM EDTA, 0.2 % Triton-X100, 1 mM Na<sub>3</sub>VO<sub>4</sub> and cOmplete protease inhibitor cocktail (Roche)), and insoluble pellets and supernatants were separated by centrifugation at 15,000 × g at 4°C for 15 minutes. The supernatants were incubated in rotation at 4°C for more than 3 hours with a protein complex of anti-HA antibody (Cell signaling technology) and Dynabeads Protein A (Thermo Fisher Scientific). After the rotation, beads were washed twice with TBS-T buffer and once with TBS buffer. The immunoprecipitates were eluted from beads by incubating in

2×Laemmli's sample buffer, then mercaptoethanol was added at the final concentration of 9%. Samples were boiled at 98°C for 5 minutes and then subjected to immunoblotting. Total fraction samples were prepared using 20% of the cell extracts.

### ***Immunocytochemistry***

Cells were fixed with 4% paraformaldehyde for 15 minutes at 37°C, permeabilized with 90% methanol in PBS for 20 minutes under -20°C and incubated for 20 hours (Fig. 1B and D, Fig. 3J, Fig. S1A, Fig. S3G) or 1 hour (Fig. 5A, Fig S3E) in PBS containing 2% FBS and 2% BSA (blocking buffer) at room temperature. They were then exposed at room temperature first for 1 hour to primary Abs in blocking buffer and then for 30 minutes to Alexa Fluor–conjugated secondary Abs (Thermo Fisher Scientific) in blocking buffer. ProLong Gold (Thermo Fisher Scientific) was used as a mounting medium. Images were acquired on a Nikon Ti2 Eclipse microscope with an A1R confocal, a CFI Plan Apochromat Lambda D 100X Oil (NA 1.45), a laser unit (Nikon; LU-N4, 405, 488, 561, and 640 nm), and filters (450/50 nm, 525/50 nm, 595/50 nm, 700/75 nm for 405 nm, 488 nm, 561 nm, 640 nm laser, respectively). All equipment was controlled via Nikon Elements software. Optical sectioning was performed at Nyquist for the longest wavelength. The resulting images were deconvoluted with NIS-elements (Nikon) and processed with NIS-elements (Nikon) or ImageJ (NIH). In Fig. 3J and Fig. S3G, the images were taken as z-stack images (interval; 100nm) and then 3D-deconvoluted with NIS-elements (Nikon) to enhance resolution. One z-slice image was arbitrarily selected in each cell as a representative image and used in the analyses in Fig. 3K-M, and Fig. S3H and I.

### ***Analysis of PDZD8 and FKBP8 localization in fluorescent images***

All analyses of PDZD8 and FKBP8 localization in fluorescent images, except for Fig.5B-D, were conducted using Python. In Fig.1B and D, mitochondrial area, lysosomal area, or late endosomal area were calculated in binarized images of Tomm20, OXPHOS, Lamp1 or Rab7, and then the percentage of PDZD8 intensity on mitochondria, lysosome or late endosome was calculated. In Fig.3K-M, mitochondrial area was calculated in binarized images of Tomm20. In Fig.3K, to calculate Mander's coefficient between FKBP8 and Tomm20, the sum of FKBP8 intensity on mitochondria divided by total FKBP8 intensity was calculated. In Fig.3L, to calculate the ratio of PDZD8 puncta colocalized with FKBP8, the puncta of PDZD8 were counted in the binarized images of PDZD8 using OpenCV's connectedComponents function, and the distance map of FKBP8 puncta was created using the binarized images of FKBP8 by OpenCV's distanceTransform function. Then the percentage of PDZD8 puncta with zero distance from the nearest FKBP8 was calculated. For the "on mito" region, the number of PDZD8 puncta that overlapped in part or all with mitochondria and had zero distance to the nearest mitochondrial FKBP8 were counted, while for the "off mito" region, the number of PDZD8 puncta that did not overlap with mitochondria at all and had zero distance to the nearest cytosolic FKBP8 were counted. In Fig.3M, FKBP8-present or FKBP8-absent mitochondrial area was calculated using binarized images of Tomm20 and FKBP8, and then the sum of PDZD8 intensity divided by the area of ROI was calculated. All binarized images were created using OpenCV's threshold function. Image analyses in Fig. S3H and I were performed using the same methods as in Fig.3K-M. In Fig. 5B and C, ROIs were defined manually and Pearson's correlation coefficient in the ROIs was calculated by "colocalization" tool on NIS-elements (Nikon). In Fig. 5D, ROIs were defined manually and the intensity of the anti-GFP signal in the ROIs was calculated by "ROI Statistics" tool on NIS-elements (Nikon).

### ***Protein expression and purification***

For the expression of FLAG-tagged human PDZD8 (1, 28)-, human *PDZD8* sequences were cloned into the pCAG vector. Recombinant human PDZD8 (1-28) - FLAG was expressed in Expi293 Cells (Thermo Fisher

Scientific) using ExpiFectamine 293 Transfection Kit (Thermo Fisher Scientific) according to the manufacturer's protocol. The cells were cultured for 4 days after transfection at 37°C and 8% CO<sub>2</sub>. The Expi293 cell pellets were homogenized with lysis buffer (25 mM Tris-HCl (pH 8.0) 150 mM NaCl) and centrifuged at 40,000 × g for 30 minutes at 4°C. The supernatant was filtered through an 0.8-µm pore-size filter and subsequently applied to a DDDDK-tagged protein purification gel (MBL) equilibrated with the lysis buffer. After washing with the lysis buffer once, the FLAG-tagged proteins were eluted with 1 M L-arginine-HCl (pH 4.4). The eluted fraction was dialyzed with an SEC buffer (25 mM Tris pH 8.0 containing 300 mM NaCl, and 5 mM DTT). The dialyzed fraction was subjected to size-exclusion chromatography in a HiLoad 16/600 Superdex 200 pg column equilibrated with the SEC buffer in an AKTA system (GE Healthcare). The purified fractions were concentrated using Amicon Ultra-15 (Cut off: 100 kDa) Centrifugal Filter Units (MERCK). For expressing GST-tagged human PDZD8 (1, 28-506) - HA, human PDZD8 sequences were cloned in pGEX4-T-1 vector (Cytiva) and transformed into *Escherichia coli* BL21 (DE3) cells. After culturing 24 hours at 37°C, the cells are incubated at 28°C until OD<sub>600</sub> reaches 0.6-1.0. Then 0.5 mM of IPTG was added into the LB medium and incubated at 20°C. 16-20 hours after IPTG induction, the cells are collected by centrifugation (8,000 × g 10 minutes 4°C), frozen by liquid nitrogen, and stored at -30°C. The frozen pellet was mixed with lysis buffer (20 mM Tris pH 8.0, 500 mM NaCl, 5 mM DTT, 10 mM EDTA, and Benzonase diluted at 1:5000) and lysed with an ultrasonic disruptor. The cell lysate was centrifuged (40,000 × g for 30 minutes) at 4 °C. The supernatant was filtered through an 0.8-µm pore-size filter and subsequently loaded onto a Glutathione Sepharose 4B (Cytiva) equilibrated with a lysis buffer. After washing with (20 mM Tris pH 8.0, 500 mM NaCl, 5 mM DTT, 10 mM EDTA, 1% Triton-X100) once, with (20 mM Tris pH 8.0, 500 mM NaCl, 5 mM DTT) twice, and the GST-tagged protein were eluted with Elute buffer (50 mM Tris-HCl, 10 mM reduced glutathione, pH 8.0). For the expression of His-tagged human FKBP8 (1-380), pRSETA-hFKBP8 (1-380) - Histag (a kind gift from Dr. Chrisostomos Prodromou<sup>56</sup>) was transformed into *Escherichia coli* C43 (DE3) cells. After culturing for 24 hours at 37°C, the cells were incubated at 28°C until the OD<sub>600</sub> reached 0.6-1.0. Then, 0.5 mM of IPTG was added to the LB medium and incubated at 20°C. 16-20 hours after IPTG induction, the cells were collected by centrifugation (8,000 × g for 10 minutes at 4°C), frozen in liquid nitrogen, and stored at -30°C. The frozen pellet was homogenized with lysis buffer (20 mM Tris-HCl pH 7.5, 100 mM NaCl, 0.5 mM imidazole, Benzonase diluted at 1:10,000) and centrifuged at 40,000 × g for 30 minutes at 4°C. The supernatant was filtered through an 0.8-µm pore-size filter and subsequently loaded onto a TALON Metal Affinity Resin (Clontech) equilibrated with the lysis buffer. After washing with the wash buffer (20 mM Tris-HCl pH 7.5, 100 mM NaCl 5 mM imidazole) twice, the protein was eluted with elution buffer (20 mM Tris-HCl pH 7.0, 100 mM NaCl, 500 mM imidazole). The eluted fraction was dialyzed with an SEC buffer (20 mM Tris pH 7.5 containing 500 mM NaCl, 1.0 mM EDTA, and 5 mM DTT). The dialyzed fraction was subjected to size-exclusion chromatography in a HiLoad 16/600 Superdex 200 pg column equilibrated with the SEC buffer in an AKTA system (GE Healthcare).

### **SPR (Surface Plasmon Resonance)**

The interactions of hPDZD8 (1, 28-) - FLAG with hFKBP8 (1-380) - Histag were analyzed using SPR in a Biacore T200 instrument (Cytiva). A Series S CM5 Biacore sensor chip (Cytiva) was activated with N-hydroxysuccinimide/N-ethyl-N'-(3-dimethylaminopropyl) carbodiimide hydrochloride, followed by immobilization of hPDZD8 (1, 28-) - FLAG at 618 resonance units. After the immobilization, the activated surface of the sensor chip was blocked with 1 M ethanolamine hydrochloride (pH 8.5). Binding analysis was performed at 25°C in a running buffer of HBS-T (10 mM HEPES-NaOH, pH 7.4, 150 mM NaCl, and 0.005% (v/v) Tween-20). A series of five 2.5-fold dilutions of the FKBP8 solution was injected into the sensor chip at



30  $\mu\text{L}/\text{min}$ , with a contact time of 120 seconds and a dissociation time of 120 seconds. The  $K_D$  values were calculated with the Steady State Affinity model on Biacore T200 Evaluation Software, version 3.2 (Cytiva).

### ***GST-Pulldown assay***

GST-hPDZD8 (1, 28-506)-HA and hFKBP8 (1-380)-Histag were mixed with Glutathione Sepharose 4B (Cytiva) in a buffer (20 mM Tris pH 7.5 containing 500 mM NaCl, 1.0 mM EDTA, 5 mM DTT) and incubated for 3 hours at 4°C. After washing with a wash buffer (20 mM Tris pH 7.5 containing 500 mM NaCl, 5mM DTT) twice, the proteins were eluted by cleaving the thrombin cleavage site with 0.04 U/  $\mu\text{L}$  thrombin (Cytiva) in an elution buffer (20 mM Tris pH 7.5 containing 500 mM NaCl, 5 mM DTT, 2 mM  $\text{MgCl}_2$ ). The eluate was subjected to SDS-PAGE and processed for Western blotting with anti-Histag and anti-HA antibodies.

### ***Electron microscopy***

Cells were fixed with 2.5% glutaraldehyde (Electron Microscopy Sciences) in DMEM, for 1 hour at 37°C. After washing with 0.1 M phosphate buffer (0.02 M Sodium Dihydrogenphosphate Dihydrate, 0.08 M Disodium Hydrogenphosphate), cells were scraped and collected with 0.2% BSA/0.1 M phosphate buffer followed by centrifugation at  $820 \times g$ . After being embedded in low melting agarose (2% in 0.1M phosphate buffer, MP Biomedicals), cell pellets were sectioned at 150  $\mu\text{m}$  thickness with a Leica VT1000S vibratome. The sections were post-fixed with 1%  $\text{OsO}_4$  (Electron Microscopy Sciences), 1.5% potassium ferrocyanide (Fujifilm Wako pure chemical corporation) in a 0.05 M phosphate buffer for 30 minutes. After being rinsed for 3 times with  $\text{H}_2\text{O}$ , cells were stained with 1% thiocarbohydrazide (Sigma-Aldrich) for 5 minutes. After rinsing with  $\text{H}_2\text{O}$  for three times, cells were stained with 1%  $\text{OsO}_4$  in  $\text{H}_2\text{O}$  for 30 minutes. After rinsing with  $\text{H}_2\text{O}$  for two times at room temperature and three times with  $\text{H}_2\text{O}$  at 50°C, cells were treated with Walton's lead aspartate (0.635% lead nitrate (Sigma-Aldrich), 0.4% aspartic acid (pH 5.2, Sigma-Aldrich)) at 50°C for 20 minutes. The sections were followed by incubations in an ascending ethanol series (15 minutes each in 50% on ice, 70% on ice, and 10 minutes each in 90%, 95% ethanol/ $\text{H}_2\text{O}$  at room temperature), 10 minutes in 100% ethanol 4 times and 60 minutes in butyl 2,3-epoxypropyl ether (Fujifilm Wako pure chemical corporation). This was followed by infiltration of Epok812 resin-butyl 2,3-epoxypropyl ether for 24 hours at a 1:1 dilution. After incubating with 100% Epok812 resin for 4 hours and 2 hours, curing of the resin was achieved at 40°C for 12 hours and 60°C for 48 hours. Epok812 resin was made by mixing 7.5 g of MNA (Oken), 13.7 g of Epok812 (Oken), 3.8 g of DDSA (Oken), and 0.2 g of DMP-30 (Oken). Resin blocks were trimmed with a TrimTool diamond knife (Trim 45; DiATOME). 50-80 nm thick ultra-thin sections made with a diamond knife (Ultra 45; DiATOME) were collected on the cleaned silicon wafer strip in a Leica Ultramicrotome (UC7). The ultra-thin sections were imaged with a scanning electron microscope (JSM7100F; JEOL). Imaging was done at 5 kV accelerating voltage, probe current setting 12,  $1,280 \times 960$  frame size, and 7.4 mm working distance, using the Backscattered Electron Detector. The final pixel size was 7.8 nm square.

### ***Quantification of MERCS size in electron micrographs***

Electron micrographs were manually annotated using PHILOW software<sup>51</sup>. Mitochondria and ER in the vicinity of mitochondria were annotated and ER regions within 3 pixel (= 23.4 nm) of the mitochondrial periphery were defined as MERCS. One cell in the *Pdzd8* cKO condition was excluded from the statistical analysis because it was considered an outlier in the Smirnov-Grubbs test ( $\alpha = 0.01$ ).

### ***Lentivirus production***

Recombinant lentiviruses were produced as previously reported.<sup>57</sup> 293T cells (BRC) were co-transfected with shuttle vectors (FUW-CreERT2-P2A-NeoR), HIV-1 packaging vectors Delta8.9 and VSV-G envelope

glycoproteins, or shuttle vectors (pLKO-shFKBP8 or pLKO-scramble), LP1, LP2, and VSV-G using FuGENE transfection reagent (Promega, catalog no. E2311). Twenty-four hours after transfection, the media were exchanged with 8 mL of fresh DMEM supplemented with 10% FBS, and 1% penicillin-streptomycin, and 24 hours later, supernatants were harvested, spun at  $500 \times g$  to remove debris and filtered through a  $0.45 \mu\text{m}$  filter (Sartorius). The filtered supernatant was concentrated to  $125 \mu\text{L}$  using an Amicon Ultra-15 (molecular weight cut-off  $100 \text{ kDa}$ ) centrifugal filter device (Merck Millipore), which was centrifuged at  $4,000 \times g$  for 60 minutes at  $4^\circ\text{C}$ . Then,  $100 \mu\text{L}$  of viral supernatants was added to each 6-well dish containing MEFs.

### ***Live cell imaging***

Prior to imaging, cells were washed twice with PBS and then incubated in phenol red-free full DMEM supplemented with 10% FBS and 1% P/S for approximately 30 minutes. During the imaging, cells were maintained at  $37^\circ\text{C}$  in an incubation chamber (Tokai Hit). Images were acquired on a Nikon Ti2 Eclipse microscope with an A1R confocal, a CFI Plan Apochromat Lambda D 100X Oil (NA 1.45), a laser unit (Nikon; LU-N4, 405, 488, 561, and 640 nm), and filters (450/50nm, 525/50nm, 595/50nm for 405 nm, 488 nm, and 561 nm, respectively). All equipment was controlled via Nikon Elements software. Optical sectioning was performed at Nyquist for the longest wavelength. The resulting images were deconvoluted with NIS-elements (Nikon). The resulting images were processed with NIS-elements (Nikon) or ImageJ (NIH).

### ***HaloTag staining (other than for single molecule tracking)***

PDZD8-HaloTag knocked-in HeLa cells were incubated with 200 nM Janelia Fluor (JF) 549 dye (Promega, catalog no. GA1110) at  $37^\circ\text{C}$  o/n. 3 hours before the confocal imaging, 3 times PBS washes were performed and mediums were changed to JF549 free DMEM, then incubated at  $37^\circ\text{C}$ .

### ***Single particle tracking-photoactivation localization microscopy and analysis***

#### ***Sample preparation***

Coverslips (25 mm, No. 1.5, high tolerance, Warner Scientific) were cleaned according to a previously described protocol<sup>58</sup> and stored in dry, sterile, 35mm tissue culture dishes sealed with parafilm until use within 3 months. Immediately before plating, coverslips were coated with  $500 \mu\text{M}$  phenol red-free Matrigel (Corning) for one hour at  $37^\circ\text{C}$ . Coverslips were then washed once with sterile PBS before being overlaid with 2 mL of complete, phenol red-free DMEM. Simultaneously,  $1 \times 10^6$  COS7 cells per sample were trypsinized and resuspended directly into a transfection cocktail made of 750 ng PrSS-mEmerald-KDEL, 500 ng mTagRFP-T2-Mito-7, and 250 ng of msPDZD8-HaloTag-N1 mixed with Fugene HD (Promega) according to the manufacturer's specifications. Cells were incubated in the suspension for 15 minutes at 37 degrees, and then the entire mixture was plated onto the coverslip and incubated for 18-22 hours until imaging. Any cells that were not imaged before 24 hours post transfection were discarded. Immediately prior to imaging, coverslips were loaded into a custom imaging chamber, labeled for 1 minute with 10 nM PA-JF646<sup>59</sup> in OptiMEM (Gibco), and washed excessively (at least 5 times) with 10 mL of sterile PBS. Washing was performed while simultaneously aspirating from the chamber, taking extreme care to never expose the cells directly to the air. Cells were then washed once with 10 mL of complete, phenol red-free medium and allowed to recover in 1 mL of complete, phenol red-free DMEM for 15 minutes before imaging.

#### ***Microscopy and Imaging Conditions***

Single molecule imaging was performed using a custom inverted Nikon TiE scope outfitted with a stage top incubation system to maintain cells at  $37^\circ\text{C}$  with 5%  $\text{CO}_2$  and appropriate humidity during imaging (Tokai Hit). Regions amenable to sptPALM (primarily the flat lamella of cells,  $500 \text{ nm}$  thick or less) were located by eye using the fluorescence of the ER label. The experimenter was always blinded to the single molecule tracers

when choosing the cell region for imaging. Once a region with sufficiently flat ER was chosen, excitation was achieved using three fiber couples solid state laser lines (488 nm, 561 nm, 642 nm, Agilent Technologies) to illuminate the sample. The excitation beams were introduced into the system with a traditional rear-mount TIRF illuminator, which was used to manually set the angle of incidence beneath the critical angle to provide the most even illumination across the ER in the field of view. The illumination by the 488 nm and 561 nm lines were adjusted for each sample to minimize the bleed through into the single molecule channel, but both were always kept beneath 50  $\mu$ W (488 nm) and 150  $\mu$ W (561 nm) total power into the back aperture. The single molecule channel was always collected with a constant 11.5 mW of 642 nm light introduced into the back aperture.

Emission light was collected using a 100x  $\alpha$ -plan apochromat 1.49 NA oil immersion objective (Nikon Instruments). The collected light was focused onto three simultaneously running, electronically synchronized iXon3 electron multiplying charged coupled device cameras (EM-CCD, DU-897; Andor Technology), using a MultiCam optical splitter (Cairn Research) and sequential 565LP and 647LP dichroic mirrors (Chroma) within the optical path. The three emission paths were additionally cleaned up with a 525/50 BP, 605/70 BP, and 705/60 BP filter (Chroma) to filter extra light in the system.

The microscope was operated in sptPALM mode using only 128  $\times$  128 pixel region on the camera (20.48  $\mu$ m  $\times$  20.48  $\mu$ m) to drive the system quickly enough to unambiguously track single proteins. The location of the region was always selected close to the center of the camera chip, since the objective being used is only chromatically well corrected at the center of the field of view. Imaging was performed with 5 msec exposure times, and the final speed was monitored using an oscilloscope directly coupled to the system (mean frame rate  $\sim$ 95 Hz).

### **Trajectory generation and analysis**

Single molecule localizations were linked to form trajectories using the TrackMate plugin in Fiji. Linking parameters were experimentally selected for each data set to minimize visible linkage artifacts as identified by eye. The resulting trajectories were then projected on to the ER network and manually curated for linkages that are close in 2D space but prohibitively far in the underlying ER structure itself. The resulting trajectories were exported from TrackMate and analyzed in Matlab for subsequent analysis, as described elsewhere.<sup>24</sup>

### **Correlative light and electron microscopy**

Correlative light and electron microscopy was conducted as previously described.<sup>60</sup> *PDZD8*-Halotag knocked-in HeLa cells were overexpressed with plasmids encoding Venus-FKBP8<sup>N403K</sup> and then treated with 200 nM Janelia Fluor 549 dye (Promega) for 20 hours at 37°C. After that, cells were washed with PBS twice and plated in no. 1S gridded coverslip-bottom dishes (custom made, based on IWAKI 3922-035; coverslips were attached inverted side), precoated with carbon by vacuum coater and then coated with poly-d-lysine. The cells were fixed with 2% paraformaldehyde (Electron Microscopy Sciences) in PBS at room temperature for 10 minutes and then washed with PBS. Fluorescence imaging was conducted using Nikon AX confocal microscopy with Nikon Spatial Array Confocal (NSPARC) detector and a CFI Plan Apochromat Lambda D 100X Oil (NA 1.45). The wavelength range of 503-545 nm or 582-618nm was obtained by excitation with a 488 nm or 561nm laser, respectively. The cells were then fixed with 2.5% glutaraldehyde in 0.1 M phosphate buffer (pH 7.4) for 2 days at 4°C. After washing with 0.1 M phosphate buffer, the cells were post-fixed with 1% OsO<sub>4</sub> (Electron Microscopy Sciences), 1.5% potassium ferrocyanide (Fujifilm Wako pure chemical corporation, catalog no. 161-03742) in a 0.05 M phosphate buffer for 30 minutes. After being rinsed 3 times with H<sub>2</sub>O, the cells were stained with 1% thiocarbohydrazide (Sigma-Aldrich) for 5 minutes. After rinsing with H<sub>2</sub>O for three times, the cells were stained with 1% OsO<sub>4</sub> in H<sub>2</sub>O for 30 minutes. After rinsing with H<sub>2</sub>O for two times at room

temperature and three times with H<sub>2</sub>O at 50°C, the cells were treated with Walton's lead aspartate (0.635% lead nitrate (Sigma-Aldrich), 0.4% aspartic acid (pH 5.2, Sigma-Aldrich)) at 50°C for 20 minutes. The cells dehydrated with an ascending series of ethanol (15 minutes each in 50% on ice, 70% on ice, and 10 minutes each in 90%, 95% ethanol/H<sub>2</sub>O at room temperature, 10 minutes in 100% ethanol 4 times at room temperature) were embedded in epoxy resin (LX-112) by covering the gridded glass with a resin-filled beam capsule. LX-112 resin was made by mixing 4.85 g of NMA (Ladd Research Industries), 7.8 g of LX-112 (Ladd Research Industries), 2.35 g of DDSA (Ladd Research Industries), and 0.3 g of BDMA (Ladd Research Industries). Polymerization was carried out at 42°C for 12 hours and 60°C for 72 hours. After polymerization, the gridded coverslip was removed and the resin block was trimmed to a square of about 150 to 250 µm. The block was sectioned using an ultramicrotome (EM UC7, Leica) equipped with a diamond knife (Ultra JUMBO 45 degree, DiATOME) to cut 50 nm thick sections. The serial ultra-thin sections were collected on the cleaned silicon wafer strip and imaged with a scanning electron microscope (JSM-IT800; JEOL). Imaging was done at 2 kV accelerating voltage, 34.1 pA beam current, 5,120 × 3,840 frame size, 6.5 mm working distance, 1.28 × 0.96 µm field of view (pixel size is 2.5 nm) and 1.33 µs dwell time, using the Scintillator Backscattered Electron Detector. The images taken by confocal microscopy were processed with ImageJ (NIH). The electron micrographs were stitched by Stitch Sequence of Grids of Images Plugin and aligned using the Linear Stack Alignment with Scale Invariant Feature Transform (SIFT) Plugin, implemented in ImageJ (NIH). After converting pixel size 2.5 nm to 5 nm by OpenCV's resize function, mitochondria and ERs in the vicinity of mitochondria in electron micrographs were semi-automatically annotated using empanada software<sup>52</sup> and PHILOW software<sup>51</sup>. ER regions within 5 pixels (= 25 nm) of the mitochondrial periphery were defined as MERCS. Reconstructing electron micrographs to 3-dimensional images and overlaying it with fluorescence images were conducted using Imaris software (Bitplane). The z projection of electron micrographs was created using ImageJ (NIH).

### ***Cryo-Correlative light and electron microscopy***

Cells were transiently transfected with FKBP8<sup>N403K</sup>-mScarlet plasmid for 24 hours and then were transferred to cryo-EM grids (Quantifoil, 200-Au-mesh with carbon film) (pre-treated with 50 µg/ml fibronectin for at least 15 minutes) and incubated for 3 hours. The cells were incubated with 5% glycerol in the media for 15 minutes right before freezing after which the media was exchanged with PBS and 5% glycerol, and the grids were plunge-frozen. A Leica GP2 was used for plunge freezing with double blotting each for 7 seconds. The grids were stored in liquid nitrogen for the following steps. First, the grids were imaged using a Zeiss LSM900 AiryScan and the Linkam cryo-stage to screen for overall quality and transfection efficiency. Second, 4 grids were milled in one session using an Aquilos2 FIB-SEM equipped with the Delmic IceShield. 35 lamellae were generated with a thickness of around 170 nm and varying surface areas. These lamellae were loaded on a Titan Krios equipped with a K3 detector and BioQuantum energy filter. High-resolution medium-mag montages of lamellae were collected and manually inspected for MERCS. MERCS were then targeted for high-resolution tilt series acquisition at a pixel size of 2.07 Å/pixel. Grids were loaded into the cassette with a lamella pre-tilt of -9 degrees, thus the tilt series acquisition started at 9 degrees, with a target range of -42 to +60 degrees on the grid (-51 to +51 on the lamellae) acquired in 3-degree increments in a dose-symmetric fashion using SerialEM.<sup>61</sup> The data collection was monitored live using Warp.<sup>62</sup> After cryo-ET data collection, the lamellae were imaged in the Zeiss AiryScan with a 100x objective. This was feasible since we discovered that the mScarlet tag survives TEM radiation. The fluorescence images were overlaid on the TEM montages using the MAPS software (Thermo Fisher Scientific). Tilt series alignment was done using AreTomo. Weighted back projection tomogram reconstructions were CTF-deconvolved using ISONET.<sup>63</sup> Initial Segmentation was done using TomoSegMemTV<sup>64</sup> on the deconvolved tomograms. The segmentations were corrected and labelled

manually using Amira. The segmentations were subsequently processed and analyzed using the surface morphometrics analysis toolkit.<sup>33</sup> In the OE condition, 73 out of 116 collected tomograms (63%) contained at least one contact site, while in the control, only 19 out of 49 collected tomograms (38%) contained at least one contact site. Full analysis was on 20 MERCS for the OE condition, and 6 for the control.

### **Sample preparation and LC-MS/MS for *Pdzd8-3×HA* knock-in mouse brain**

*Pdzd8-3×HA* knock-in mice and control littermates at postnatal 10 days were put to sleep using medetomidine hydrochloride (Domitor, Nippon zenyaku kogyo, 0.75 mg/kg), midazolam (Sandoz, 4 mg/kg) and butorphanol (Vetorphale, Meiji Seika Pharma Co., Ltd, 5 mg/kg). Pups were then put on the ice for 5 minutes and exsanguinated by terminal intracardial perfusion with ice-cold 2% paraformaldehyde (Merck) in phosphate-buffered saline (PBS). The neocortex was then removed and sonicated five times for 30 seconds with ice-cold lysis buffer (20 mM Hepes-NaOH pH7.5, 1 mM EGTA, 1 mM MgCl<sub>2</sub>, 150 mM NaCl, 0.25% Na-deoxycholate, 0.05% SDS, 1% NP40, Benzonase (Merck), PhosSTOP phosphatase inhibitor (Roche) and cOMplete protease inhibitor cocktail (Roche)). After the lysates were centrifuged at 20,000 × g for 15 min at 4°C, the resulting supernatants were incubated for 3 hours at 4°C with a 2.5 μL slurry of Sera-Mag SpeedBeads Protein A/G (Cytiva) pre-incubated with 2.5 μL of anti-HA-tag rabbit mAb (Cell signaling technology, C29F4). The beads were washed four times with the lysis buffer and then twice with 50 mM ammonium bicarbonate. Proteins on the beads were digested by adding 200 ng trypsin/Lys-C mix (Promega) at 37 °C overnight. The resulting digests were reduced, alkylated, acidified, and desalted using GL-Tip SDB (GL Sciences). The eluates were evaporated and dissolved in 0.1% trifluoroacetic acid and 3% ACN. LC-MS/MS analysis of the resultant peptides was performed on an EASY-nLC 1200 UHPLC connected to an Orbitrap Fusion mass spectrometer through a nanoelectrospray ion source (Thermo Fisher Scientific). The peptides were separated on a C18 reversed-phase column (75 mm [inner diameter] x 150 mm; Nikkyo Technos) with a linear 4%–32% ACN gradient for 0–100 minutes, followed by an increase to 80% ACN for 10 minutes and final hold at 80% ACN for 10 minutes. The mass spectrometer was operated in data-dependent acquisition mode with a maximum duty cycle of 3 seconds. MS1 spectra were measured with a resolution of 120,000, an automatic gain control (AGC) target of 4e5, and a mass range of 375–1,500 m/z. HCD MS/MS spectra were acquired in the linear ion trap with an AGC target of 1e4, an isolation window of 1.6 m/z, a maximum injection time of 35 ms, and a normalized collision energy of 30. Dynamic exclusion was set to 20 s. Raw data were directly analyzed against the SwissProt database restricted to *Mus musculus* using Proteome Discoverer version 2.5 (Thermo Fisher Scientific) with Sequest HT search engine for identification and label-free precursor ion quantification. The search parameters were as follows: (i) trypsin as an enzyme with up to two missed cleavages; (ii) precursor mass tolerance of 10 ppm; (iii) fragment mass tolerance of 0.6 Da; (iv) carbamidomethylation of cysteine as a fixed modification; and (v) acetylation of the protein N-terminus and oxidation of methionine as variable modifications. Peptides and proteins were filtered at a false discovery rate (FDR) of 1% using the Percolator node and Protein FDR Validator node, respectively. Label-free quantification was performed on the basis of the intensities of precursor ions using the Precursor Ions Quantifier node. Normalization was performed such that the total sum of abundance values for each sample over all peptides was the same.

### **Sample preparation and LC-MS/MS for *PDZD8-TurboID* KI HeLa cells**

*PDZD8-TurboID* knocked-in HeLa cells were plated into a 15 cm dish at the density of 2×10<sup>6</sup> cells/dish and cultured two overnight. The cells were treated with Biotin at the final concentration of 50 μM, and incubated for 6 hours. The cells were washed twice with ice-cold Hepes-saline and lysed in 6 M guanidine-HCl (Wako) containing 100 mM HEPES-NaOH (pH7.5), 10 mM TCEP (Nacalai), and 40 mM chloroacetamide (Sigma).

Following sample preparation and analysis were conducted as described previously.<sup>65</sup> Briefly, after heating and sonication, proteins (1.3 mg each) were purified by methanol–chloroform precipitation and resuspended in 200  $\mu$ L of PTS buffer (12 mM SDC, 12 mM SLS, 100 mM Tris-HCl, pH8.0). After sonication and heating at 95 °C for 10 minutes, the protein solutions were diluted 5-fold with 100 mM Tris-HCl, pH8.0 and digested with 13  $\mu$ g of trypsin (Pierce) at 37 °C overnight. After heating at 95 °C for 10 minutes, the digested peptides were incubated with the ACN-prewashed Tamavidin 2-REV beads (FUJIFILM Wako) for 3 hours at 4°C. After washing five times with TBS (50 mM Tris-HCl, pH7.5, 150 mM NaCl), biotinylated peptides were eluted for 15 minutes at 37°C twice with 100  $\mu$ L of 1 mM biotin in TBS. The combined eluates were desalted using GL-Tip SDB, evaporated, and redissolved in 0.1% TFA and 3% ACN. LC-MS/MS analysis of the resultant peptides was performed on an EASY-nLC 1200 UHPLC connected to an Orbitrap Fusion mass spectrometer. The peptides were separated on the C18 reversed-phase column with a linear 4%–32% ACN gradient for 0–60 minutes, followed by an increase to 80% ACN for 10 minutes and final hold at 80% ACN for 10 minutes. The mass spectrometer was operated in data-dependent acquisition mode with a maximum duty cycle of 3 seconds. MS1 spectra were measured with a resolution of 120,000, an AGC target of 4e5, and a mass range of 375–1,500 m/z. HCD MS/MS spectra were acquired in the linear ion trap with an AGC target of 1e4, an isolation window of 1.6 m/z, a maximum injection time of 200 ms, and a normalized collision energy of 30. Dynamic exclusion was set to 10 s. Raw data were directly analyzed against the SwissProt database restricted to *Mus musculus* using Proteome Discoverer version 2.5 with Sequest HT search engine for identification and label-free precursor ion quantification. The search parameters were as follows: (i) trypsin as an enzyme with up to two missed cleavages; (ii) precursor mass tolerance of 10 ppm; (iii) fragment mass tolerance of 0.6 Da; (iv) carbamidomethylation of cysteine as a fixed modification; and (v) acetylation of the protein N-terminus, oxidation of methionine, and biotinylation of lysine as variable modifications. Peptides and proteins were filtered at a FDR of 1% using the Percolator node and Protein FDR Validator node, respectively. Label-free quantification was performed on the basis of the intensities of precursor ions using the Precursor Ions Quantifier node. Normalization was performed such that the total sum of abundance values for each sample over all peptides was the same.

### ***Sample preparation and LC-MS/MS for Proximity labeling-Mass spectrometry for PDZD8-TurboID KI Neuro2a cells in situ Biotinylation***

*Pdzd8-v5-TurboID* knock-in cell (mouse Neuro2a) were grown in T75 (75cm<sup>2</sup>) cell culture flask. One flask per each triplicate samples were prepared for MS analysis. The cells were then treated with biotin (50  $\mu$ M) in complete DMEM medium for 30 minutes at 37°C. The labeled cells were washed three times with cold DPBS 30 minutes after the in situ biotinylation, following next cell lysis. The cells were lysed with 750  $\mu$ L of 1  $\times$  TBS (25 mM Tris, 0.15 M NaCl, pH 7.2) containing 2% SDS and 1  $\times$  protease inhibitor cocktail. Lysates were clarified by ultrasonication (Bioruptor, diagenode) to physically break down nucleic acid such as DNA for 5 minutes three times with iced water bath.

#### **Enrichment of biotinylated peptide and LC-MS/MS**

The 4 ml of cold acetone were added to the lysates and incubated at -20°C for at least 2 hours to 16 hours. After first precipitation with acetone, the samples were centrifuged at 13,000  $\times$  g for 10 minutes at 4°C and the supernatant was gently discarded. To completely reconstitute all proteins, samples were incubated with cooled 10% TBS/90% acetone at -20°C for at least 2 hours to 16 hours. The samples were centrifuged at 13,000  $\times$ g for 10 minutes at 4°C and the supernatant was gently discarded. The pellets were reconstituted with 500  $\mu$ L of 8 M urea containing 50 mM ABC, followed by measuring proteins concentration using BCA assay. Denaturation was performed at 650 rpm for 1 hour at 37°C. Samples were reduced by reducing agent,

10 mM DTT and alkylated with 40 mM IAA at 650 rpm for 1 hour at 37°C, respectively. The Samples were diluted 8-fold with 50 mM ABC containing 1 mM CaCl<sub>2</sub>. Samples were digested with (50:1 w/w) trypsin at 650 rpm for at least 6 to 18 hours at 37°C. Insoluble fractions were removed by centrifugation for 10 minutes at 10,000 × g. The 150 µl of Streptavidin magnetic beads were firstly washed with 1× TBS containing 2 M urea four times and then added to the digested solution. The binding with the beads were for 1 hour room temperature, followed by washing the beads two times with 50 mM ABC containing 2 M urea. The washed beads were washed with pure water compatible with LC-MS and transferred to new protein lobind tubes (Eppendorf). For elution of biotinylated peptides from the beads, 150 µl of elution solution (80% ACN, 20% pure water, 0.2% TFA, and 0.1% formic acid) were incubated at 60°C three times repeatedly. Total elution fractions were completely dried using a speedvac. The resulting peptides were analyzed by Q Exactive Plus orbitrap mass spectrometer (Thermo Fisher Scientific, MA, USA) equipped with a nanoelectrospray ion source. To separate the peptide mixture, we used a C18 reverse-phase HPLC column (500 mm × 75 µm ID) using an acetonitrile/0.1% formic acid gradient from 4 to 32.5% for 120 minutes at a flow rate of 300 nL/min. For MS/MS analysis, the precursor ion scan MS spectra (m/z 400~2000) were acquired in the Orbitrap at a resolution of 70,000 at m/z 400 with an internal lock mass. The 15 most intensive ions were isolated and fragmented by High-energy collision induced dissociation (HCD).

#### **LC-MS/MS data processing of biotinylated peptides**

All MS/MS samples were analyzed using the Sequest Sorcerer platform (Sagen-N Research, San Jose, CA, USA) Sequest was set up to search the *Mus musculus* protein sequence database (86320 entries, UniProt, <http://www.uniprot.org/>) assuming the digestion enzyme stricttrypsin. Sequest was searched with a fragment ion mass tolerance of 1.00 Da and a parent ion tolerance of 10.0 ppm. Carbamidomethylation of cysteine was specified in Sequest as a fixed modification. Oxidation of methionine, acetyl of the n-terminus, phospho of serine, threonine and tyrosine and biotin of lysine were specified in Sequest as variable modifications. Scaffold (Version 4.11.0, Proteome Software Inc., Portland, OR, USA) was used to validate MS/MS-based peptide and protein identifications. Peptide identifications were accepted if they could be established at greater than 95.0% probability by the Scaffold Local FDR algorithm. Protein identifications were accepted if they could be established at greater than 99.0% probability and contained at least 2 identified peptide. Protein probabilities were assigned by the Protein Prophet algorithm.<sup>66</sup> Proteins that contained similar peptides and could not be differentiated based on MS/MS analysis alone were grouped to satisfy the principles of parsimony. Proteins were annotated with Gene Ontology (GO) terms from the National Center of Biotechnology Information database (NCBI; downloaded November 1, 2019).<sup>67</sup>

## Supplemental Figure Legends

### Figure S1. Validation of endogenous PDZD8 staining for PDZD8-Venus KI NIH3T3 and PDZD8-HaloTag KI HeLa cells, related to Figure 1

(A) Immunofluorescence analysis of *Pdzd8*-Venus KI NIH3T3 cells. The cells were stained with antibodies to GFP, to Tomm20, and to Lamp1 (not shown). Note that the signal of anti-GFP was observed in KI cells, but not WT cells. Scale bars, 10  $\mu$ m.

(B) Live imaging of Wild type HeLa cells and *PDZD8*-HaloTag KI HeLa cells transiently transfected with YFP-ActA (cyan). Endogenous *PDZD8*-HaloTag was labeled with Janelia Fluor 549 dye (magenta). Scale bars, 10  $\mu$ m.

### Figure S2. Spatially defined likelihood of PDZD8 localization in MitoCS or OtherCS, related to Figure 2

(A-B) All MitoCS (A) and OtherCS (B) identified within the dataset are shown.

### Figure S3. Establishment of *Pdzd8*-3 $\times$ HA knock-in mice, the proteome of *Pdzd8*-v5-TurboID KI Neuro2a, and colocalization analysis of PDZD8 and FKBP8 in NIH3T3 cells, related to Figure 3

(A) Diagram showing genomic sequence of *Pdzd8*-3 $\times$ HA knock-in mouse. The HA tag sequence was inserted in the end of *Pdzd8* coding region.

(B) Genomic analysis of *Pdzd8*-3 $\times$ HA knock-in mouse. The sequence around the *Pdzd8* stop codon was amplified from genomic DNA of wild type (WT) or *Pdzd8*-3 $\times$ HA knock-in (KI) mouse with primers as shown in (A). Primer sequence; 5'- gag gct tgc cga cag aag ag - 3' and 5'- agt gag aca tca cac ata cac aaa -3'.

(C) Immunoblot analysis of WT and *Pdzd8*-v5-TurboID KI Neuro2a cells with antibodies to v5 and  $\beta$ -actin.

(D) Proteins detected by proximity labeling of *Pdzd8*-v5-TurboID KI Neuro2a cells both when incubated in 50  $\mu$ M biotin-containing medium for 3 hours and 16 hours. Note that FKBP8 is in this list.

(E) Validation of specificity of the anti-FKBP8 antibody used in Figure 3J. HeLa cells transfected with siControl or siFKBP8 were stained with antibodies to FKBP8 and to Tomm20. Note that the signal of anti-FKBP8 was observed in siControl cells, but not in siFKBP8 cells. Scale bars, 5  $\mu$ m.

(F) Diagram describing the genomic sequence of *Pdzd8*-Venus KI and HA- *Fkbp8* double KI (DKI) cells. The sequence of HA tag was knocked-in at the N-terminus of *Fkbp8* coding region in *Pdzd8*-Venus KI NIH3T3 cells.

(G) Immunofluorescence analysis of *Pdzd8*-Venus and HA- *Fkbp8* DKI cells. The cells were stained with antibodies to GFP, to HA, and to OXPHOS complex. The boxed regions of the top panels are shown at higher magnification in the corresponding middle panels. Arrowheads indicate PDZD8 colocalized with FKBP8 on mitochondria. Scale bars, 5  $\mu$ m or 1  $\mu$ m (higher magnification images). Data are representative of three independent experiments.

(H) The percentage of PDZD8 puncta that overlaps with FKBP8 puncta was determined for images as in (G). PDZD8 dots on mitochondria ("on mito") were defined as those that completely overlap with mitochondria, and PDZD8 dots off mitochondria ("off mito") otherwise. Overlaps on mito or off mito were calculated by the number of puncta of PDZD8 on mito or off mito that overlap with FKBP8 divided by the total number of PDZD8 on mito or off mito respectively. Three cropped images of cytoplasmic areas per cell were created from 10 cells and used in calculation. The scrambled images of FKBP8 were created



by rotating original images at 180 degrees. Data are means  $\pm$  s.e.m. of 10 cells from three independent experiments. One-way repeated measures ANOVA and Tukey's multiple comparisons test were used to test statistical significance.  $**P < 0.01$ ,  $*P < 0.05$ , ns, not significant.

(I) The means of PDZD8 intensity in the FKBP8-present or FKBP8-absent area on mitochondria were determined for images as in (G). Data are means  $\pm$  s.e.m. of 10 cells from three independent experiments. Paired t test was used to test statistical significance.  $***P < 0.001$ .

**Figure S4. Recombinant protein properties used for SPR and establishment of *PDZD8 f/f::Cre*<sup>ERT2</sup> MEF, related to Figure 4**

(A) Purification profile of hPDZD8(1, 28-)-FLAG by size exclusion chromatography after anti-FLAG affinity column purification. Fractions 1 to 5 are used for SPR analyses.

(B) SDS-PAGE gel analysis and immunoblot analysis of the hFKBP8 (1-380) - Histag. Coomassie Brilliant Blue staining confirmed the purity of recombinant FKBP8 and immunoblot analysis with antibodies to Histag and FKBP8 showed the major band (upper one) is anti-His Tag-positive and major band (upper one) and minor band (lower one) are anti-FKBP8-positive, which suggests major band (upper one) is Full-length of FKBP8 (1-380) - Histag and, minor band (lower one) is FKBP8 whose C-terminal sequence is cleaved.

(C) Diagram showing genomic sequence of *Pdzd8* conditional KO mouse. *Pdzd8* exon 3 is surrounded by loxP sites. Cre-mediated recombination excises the encircled DNA, creating a frame-shift mutation which results in total knockout of the *Pdzd8* gene.

(D) Genomic analysis of *Pdzd8 f/f::Cre*<sup>ERT2</sup> MEFs treated with mock or 1 $\mu$ M of 4-hydroxy tamoxifen/ethanol for 24 hours. The sequence around exon 3 was amplified from genomic DNA of each cell lysate with primers as shown in (C). Primer sequence; 5'- GCC AGT CAG AGA CCA TGA GAA A - 3' and 5'- ACA TCT GTT TTG TTT ACC ACT CTG C -3'.

(E) Immunoblot analysis of *Pdzd8 f/f::Cre*<sup>ERT2</sup> MEFs with antibodies to PDZD8 and  $\beta$ -actin. Cells were treated with mock (-) or 1  $\mu$ M of 4-hydroxy tamoxifen for indicated time.

**Figure S5. Electron micrographs of Correlative Light and Electron Microscopy (CLEM) analysis, related to Figure 5**

(A) Scheme of Correlative Light and Electron Microscopy (CLEM) analysis. A *PDZD8*-HaloTag KI HeLa cell, which was labeled with JF549-conjugating HaloTag ligands and expressed Venus-FKBP8<sup>N403K</sup>, was observed in confocal microscopy with Nikon Spatial Array Confocal (NSPARC) detector after fixation, and the same cell was subsequently imaged by field emission scanning electron microscope (FE-SEM). The resulting electron micrographs were utilized to reconstruct a 3-dimensional (3D) image, and then the corresponding area in the fluorescence image was re-identified in the electron micrographs.

(B) Electron micrographs of the serial 8 slices corresponding to an optical section of fluorescence images. Mitochondria and the ER within 25 nm of mitochondria (MERCs) were indicated as cyan and yellow respectively.

**Figure S6. All the ER-OMM distance histograms used for the aggregate analysis, related to Figure 6**

(A-B) All ER-OMM distance histograms for FKBP8<sup>N403K</sup> OE cells (A) and the control cells (B) used in Figure 6G.

### **Figure S7. Validation of conditional KO of PDZD8 and KD of FKBP8, related to Figure 7**

(A) Immunoblot of *Pdzd8* f/f::Cre<sup>ERT2</sup> MEFs infected with lentivirus carrying shControl or shFKBP8, treated with or without 0.5  $\mu$ M 4-OHT. Cell lysates were subjected to immunoblotting with antibodies to PDZD8, FKBP8, and  $\alpha$ -tubulin.

### **Supplemental movie 1. Endogenous PDZD8-HaloTag stably localizes at MERCs**

A representative time-lapse video from a live-cell imaging of a *PDZD8*-HaloTag KI HeLa cell transfected with an ER-marker BiP-mtagBFP2-KDEL (yellow) and an OMM-marker YFP-ActA (cyan), treated with Janelia Fluor 549 dye (magenta) to label endogenous PDZD8-HaloTag. Time-lapse images are shown in Figure 1G. Images were acquired every 0.81 seconds.

### **Supplemental movie 2. Single molecules of PDZD8 show clear interactions with mitochondria in live cells**

Part1: Raw video footage played at half-real time speed showing the structures of simultaneously imaged ER, mitochondria, and individual molecules of overexpressed msPDZD8-HaloTag. Imaging data is collected at approximately 95 Hz. Part 2: Processed data labeling the location of ER, mitochondria, and trajectories of PDZD8 molecules. Locations of putative PDZD8-mediated MERCs are indicated.

### **Supplemental movie 3. PDZD8 molecules show rapid entry and exit from multiple distinct mitochondrial contact sites (MCSs) on a single mitochondrion**

A zoom of a single mitochondrion with four PDZD8-interacting contact sites with the ER (not shown). Individual trajectories are differentially colored and the distance from the center of each contact site is mapped to the left. The movie plays in approximately real time.

### **Supplemental movie 4. CLEM analysis showing accumulation of endogenous PDZD8-HaloTag to MERCs in a HeLa cell overexpressing FKBP8<sup>N403K</sup>**

CLEM analysis was conducted in a Venus-FKBP8<sup>N403K</sup>-overexpressing *PDZD8*-HaloTag KI HeLa cell. Mitochondria (cyan) and the ER within 25 nm of mitochondria (MERCs; yellow) in electron micrographs (shown as "EM") of the serial 8 slices were reconstructed to a 3-dimensional (3D) image and then merged to images of Venus-FKBP8<sup>N403K</sup> (green) and endogenous PDZD8-HaloTag (magenta) taken by confocal microscopy (shown as "LM").

### **Supplemental Table 1: The proteins identified by immunoprecipitation and LC-MS/MS analysis using the PDZD8-3 $\times$ HA KI mice neocortices**

### **Supplemental Table 2: The proteins biotinylated by endogenous PDZD8-TurboID using the PDZD8-TurboID KI HeLa cells**

### **Supplemental Table 3: The plasmid list used in this study**

## References

1. Aoyama-Ishiwatari, S., and Hirabayashi, Y. (2021). Endoplasmic Reticulum-Mitochondria Contact Sites-Emerging Intracellular Signaling Hubs. *Front Cell Dev Biol* 9, 653828. 10.3389/fcell.2021.653828.
2. Wu, H., Carvalho, P., and Voeltz, G.K. (2018). Here, there, and everywhere: The importance of ER membrane contact sites. *Science* 361. 10.1126/science.aan5835.
3. Prinz, W.A., Toulmay, A., and Balla, T. (2020). The functional universe of membrane contact sites. *Nat Rev Mol Cell Biol* 21, 7-24. 10.1038/s41580-019-0180-9.
4. Csordás, G., Renken, C., Várnai, P., Walter, L., Weaver, D., Buttle, K.F., Balla, T., Mannella, C.A., and Hajnóczky, G. (2006). Structural and functional features and significance of the physical linkage between ER and mitochondria. *J Cell Biol* 174, 915-921. 10.1083/jcb.200604016.
5. Hung, V., Lam, S.S., Udeshi, N.D., Svinkina, T., Guzman, G., Mootha, V.K., Carr, S.A., and Ting, A.Y. (2017). Proteomic mapping of cytosol-facing outer mitochondrial and ER membranes in living human cells by proximity biotinylation. *Elife* 6. 10.7554/eLife.24463.
6. Cho, K.F., Branon, T.C., Rajeev, S., Svinkina, T., Udeshi, N.D., Thoudam, T., Kwak, C., Rhee, H.W., Lee, I.K., Carr, S.A., and Ting, A.Y. (2020). Split-TurboID enables contact-dependent proximity labeling in cells. *Proc Natl Acad Sci U S A* 117, 12143-12154. 10.1073/pnas.1919528117.
7. Kwak, C., Shin, S., Park, J.S., Jung, M., Nhung, T.T.M., Kang, M.G., Lee, C., Kwon, T.H., Park, S.K., Mun, J.Y., et al. (2020). Contact-ID, a tool for profiling organelle contact sites, reveals regulatory proteins of mitochondrial-associated membrane formation. *Proc Natl Acad Sci U S A* 117, 12109-12120. 10.1073/pnas.1916584117.
8. Hirabayashi, Y., Kwon, S.K., Paek, H., Pernice, W.M., Paul, M.A., Lee, J., Erfani, P., Raczkowski, A., Petrey, D.S., Pon, L.A., and Polleux, F. (2017). ER-mitochondria tethering by PDZD8 regulates Ca. *Science* 358, 623-630. 10.1126/science.aan6009.
9. Kornmann, B., Currie, E., Collins, S.R., Schuldiner, M., Nunnari, J., Weissman, J.S., and Walter, P. (2009). An ER-mitochondria tethering complex revealed by a synthetic biology screen. *Science* 325, 477-481. 10.1126/science.1175088.
10. Hertlein, V., Flores-Romero, H., Das, K.K., Fischer, S., Heunemann, M., Calleja-Felipe, M., Knafo, S., Hipp, K., Harter, K., Fitzgerald, J.C., and García-Sáez, A.J. (2020). MERLIN: a novel BRET-based proximity biosensor for studying mitochondria-ER contact sites. *Life Sci Alliance* 3. 10.26508/lsa.201900600.
11. Shirane, M., Wada, M., Morita, K., Hayashi, N., Kunimatsu, R., Matsumoto, Y., Matsuzaki, F., Nakatsumi, H., Ohta, K., Tamura, Y., and Nakayama, K.I. (2020). Protrudin and PDZD8 contribute to neuronal integrity by promoting lipid extraction required for endosome maturation. *Nat Commun* 11, 4576. 10.1038/s41467-020-18413-9.
12. Hewitt, V.L., Miller-Fleming, L., Twyning, M.J., Andrezza, S., Mattedi, F., Prudent, J., Polleux, F., Vagnoni, A., and Whitworth, A.J. (2022). Decreasing pdzd8-mediated mito-ER contacts improves organismal fitness and mitigates A $\beta$ . *Life Sci Alliance* 5. 10.26508/lsa.202201531.
13. O'Hare, J.K., Gonzalez, K.C., Herrlinger, S.A., Hirabayashi, Y., Hewitt, V.L., Blockus, H., Szoboszlai, M., Rolotti, S.V., Geiller, T.C., Negrean, A., et al. (2022). Compartment-specific tuning of dendritic feature selectivity by intracellular Ca. *Science* 375, eabm1670. 10.1126/science.abm1670.
14. Al-Amri, A.H., Armstrong, P., Amici, M., Ligneul, C., Rouse, J., El-Asrag, M.E., Pantiru, A., Vancollie, V.E., Ng, H.W.Y., Ogbeta, J.A., et al. (2022). PDZD8 Disruption Causes Cognitive Impairment in Humans, Mice, and Fruit Flies. *Biol Psychiatry* 92, 323-334. 10.1016/j.biopsych.2021.12.017.
15. Bharadwaj, R.A., Jaffe, A.E., Chen, Q., Deep-Soboslay, A., Goldman, A.L., Mighdoll, M.I., Cotoia, J.A., Brandtjen, A.C., Shin, J., Hyde, T.M., et al. (2018). Genetic risk mechanisms of posttraumatic stress disorder in the human brain. *J Neurosci Res* 96, 21-30. 10.1002/jnr.23957.
16. Valm, A.M., Cohen, S., Legant, W.R., Melunis, J., Hershberg, U., Wait, E., Cohen, A.R., Davidson, M.W., Betzig, E., and Lippincott-Schwartz, J. (2017). Applying systems-level spectral imaging and analysis to reveal the organelle interactome. *Nature* 546, 162-167. 10.1038/nature22369.
17. Cohen, S., Valm, A.M., and Lippincott-Schwartz, J. (2018). Interacting organelles. *Curr Opin Cell Biol* 53, 84-91. 10.1016/j.ceb.2018.06.003.
18. Helle, S.C., Kanfer, G., Kolar, K., Lang, A., Michel, A.H., and Kornmann, B. (2013). Organization and function of membrane contact sites. *Biochim Biophys Acta* 1833, 2526-2541. 10.1016/j.bbamcr.2013.01.028.

19. Phillips, M.J., and Voeltz, G.K. (2016). Structure and function of ER membrane contact sites with other organelles. *Nat Rev Mol Cell Biol* 17, 69-82. 10.1038/nrm.2015.8.
20. Elbaz-Alon, Y., Guo, Y., Segev, N., Harel, M., Quinnell, D.E., Geiger, T., Avinoam, O., Li, D., and Nunnari, J. (2020). PDZD8 interacts with Protrudin and Rab7 at ER-late endosome membrane contact sites associated with mitochondria. *Nat Commun* 11, 3645. 10.1038/s41467-020-17451-7.
21. Kleele, T., Rey, T., Winter, J., Zaganelli, S., Mahecic, D., Perreten Lambert, H., Ruberto, F.P., Nemir, M., Wai, T., Pedrazzini, T., and Manley, S. (2021). Distinct fission signatures predict mitochondrial degradation or biogenesis. *Nature* 593, 435-439. 10.1038/s41586-021-03510-6.
22. Guillén-Samander, A., Bian, X., and De Camilli, P. (2019). PDZD8 mediates a Rab7-dependent interaction of the ER with late endosomes and lysosomes. *Proc Natl Acad Sci U S A* 116, 22619-22623. 10.1073/pnas.1913509116.
23. Gao, Y., Xiong, J., Chu, Q.Z., and Ji, W.K. (2022). PDZD8-mediated lipid transfer at contacts between the ER and late endosomes/lysosomes is required for neurite outgrowth. *J Cell Sci* 135. 10.1242/jcs.255026.
24. Obara, C.J., Nixon-Abell, J., Moore, A.S., Riccio, F., Hoffman, D.P., Shtengel, G., Xu, C.S., Schaefer, K., Pasolli, H.A., Masson, J.-B., et al. (2022). Motion of single molecular tethers reveals dynamic subdomains at ER-mitochondria contact sites. *bioRxiv*, 2022.2009.2003.505525. 10.1101/2022.09.03.505525.
25. Manley, S., Gillette, J.M., Patterson, G.H., Shroff, H., Hess, H.F., Betzig, E., and Lippincott-Schwartz, J. (2008). High-density mapping of single-molecule trajectories with photoactivated localization microscopy. *Nat Methods* 5, 155-157. 10.1038/nmeth.1176.
26. Johnson, B., Leek, A.N., Solé, L., Maverick, E.E., Levine, T.P., and Tamkun, M.M. (2018). Kv2 potassium channels form endoplasmic reticulum/plasma membrane junctions via interaction with VAPA and VAPB. *Proc Natl Acad Sci U S A* 115, E7331-E7340. 10.1073/pnas.1805757115.
27. Wu, M.M., Covington, E.D., and Lewis, R.S. (2014). Single-molecule analysis of diffusion and trapping of STIM1 and Orai1 at endoplasmic reticulum-plasma membrane junctions. *Mol Biol Cell* 25, 3672-3685. 10.1091/mbc.E14-06-1107.
28. Cabukusta, B., Berlin, I., van Elsland, D.M., Forkink, I., Spits, M., de Jong, A.W.M., Akkermans, J.J.L.L., Wijdeven, R.H.M., Janssen, G.M.C., van Veelen, P.A., and Neefjes, J. (2020). Human VAPome Analysis Reveals MOSPD1 and MOSPD3 as Membrane Contact Site Proteins Interacting with FFAT-Related FFNT Motifs. *Cell Rep* 33, 108475. 10.1016/j.celrep.2020.108475.
29. Branon, T.C., Bosch, J.A., Sanchez, A.D., Udeshi, N.D., Svinkina, T., Carr, S.A., Feldman, J.L., Perrimon, N., and Ting, A.Y. (2018). Efficient proximity labeling in living cells and organisms with TurboID. *Nat Biotechnol* 36, 880-887. 10.1038/nbt.4201.
30. Saita, S., Shirane, M., and Nakayama, K.I. (2013). Selective escape of proteins from the mitochondria during mitophagy. *Nat Commun* 4, 1410. 10.1038/ncomms2400.
31. Yeo, H.K., Park, T.H., Kim, H.Y., Jang, H., Lee, J., Hwang, G.S., Ryu, S.E., Park, S.H., Song, H.K., Ban, H.S., et al. (2021). Phospholipid transfer function of PTPIP51 at mitochondria-associated ER membranes. *EMBO Rep* 22, e51323. 10.15252/embr.202051323.
32. Khan, H., Chen, L., Tan, L., and Im, Y.J. (2021). Structural basis of human PDZD8-Rab7 interaction for the ER-late endosome tethering. *Sci Rep* 11, 18859. 10.1038/s41598-021-98419-5.
33. Barad, B.A., Medina, M., Fuentes, D., Wiseman, R.L., and Grotjahn, D.A. (2023). Quantifying organellar ultrastructure in cryo-electron tomography using a surface morphometrics pipeline. *J Cell Biol* 222. 10.1083/jcb.202204093.
34. Osman, C., Voelker, D.R., and Langer, T. (2011). Making heads or tails of phospholipids in mitochondria. *J Cell Biol* 192, 7-16. 10.1083/jcb.201006159.
35. John Peter, A.T., Petrunaro, C., Peter, M., and Kornmann, B. (2022). METALIC reveals interorganelle lipid flux in live cells by enzymatic mass tagging. *Nat Cell Biol* 24, 996-1004. 10.1038/s41556-022-00917-9.
36. Bhujabal, Z., Birgisdottir, Á., Sjøttem, E., Brenne, H.B., Øvervatn, A., Habisov, S., Kirkin, V., Lamark, T., and Johansen, T. (2017). FKBP8 recruits LC3A to mediate Parkin-independent mitophagy. *EMBO Rep* 18, 947-961. 10.15252/embr.201643147.
37. Aguilera, M.O., Robledo, E., Melani, M., Wappner, P., and Colombo, M.I. (2022). FKBP8 is a novel molecule that participates in the regulation of the autophagic pathway. *Biochim Biophys Acta Mol Cell Res* 1869, 119212. 10.1016/j.bbamcr.2022.119212.
38. Okamoto, T., Nishimura, Y., Ichimura, T., Suzuki, K., Miyamura, T., Suzuki, T., Moriishi, K., and Matsuura, Y. (2006). Hepatitis C virus RNA replication is regulated by FKBP8 and Hsp90. *EMBO J* 25, 5015-5025.

- 10.1038/sj.emboj.7601367.
39. Taipale, M., Tucker, G., Peng, J., Krykbaeva, I., Lin, Z.Y., Larsen, B., Choi, H., Berger, B., Gingras, A.C., and Lindquist, S. (2014). A quantitative chaperone interaction network reveals the architecture of cellular protein homeostasis pathways. *Cell* 158, 434-448. 10.1016/j.cell.2014.05.039.
  40. Bai, X., Ma, D., Liu, A., Shen, X., Wang, Q.J., Liu, Y., and Jiang, Y. (2007). Rheb activates mTOR by antagonizing its endogenous inhibitor, FKBP38. *Science* 318, 977-980. 10.1126/science.1147379.
  41. Yoon, M.S., Sun, Y., Arauz, E., Jiang, Y., and Chen, J. (2011). Phosphatidic acid activates mammalian target of rapamycin complex 1 (mTORC1) kinase by displacing FK506 binding protein 38 (FKBP38) and exerting an allosteric effect. *J Biol Chem* 286, 29568-29574. 10.1074/jbc.M111.262816.
  42. Wang, X., Fonseca, B.D., Tang, H., Liu, R., Elia, A., Clemens, M.J., Bommer, U.A., and Proud, C.G. (2008). Re-evaluating the roles of proposed modulators of mammalian target of rapamycin complex 1 (mTORC1) signaling. *J Biol Chem* 283, 30482-30492. 10.1074/jbc.M803348200.
  43. Maehama, T., Tanaka, M., Nishina, H., Murakami, M., Kanaho, Y., and Hanada, K. (2008). RalA functions as an indispensable signal mediator for the nutrient-sensing system. *J Biol Chem* 283, 35053-35059. 10.1074/jbc.M805822200.
  44. Uhlenbrock, K., Weiwad, M., Wetzker, R., Fischer, G., Wittinghofer, A., and Rubio, I. (2009). Reassessment of the role of FKBP38 in the Rheb/mTORC1 pathway. *FEBS Lett* 583, 965-970. 10.1016/j.febslet.2009.02.015.
  45. Sato, T., Nakashima, A., Guo, L., and Tamanoi, F. (2009). Specific activation of mTORC1 by Rheb G-protein in vitro involves enhanced recruitment of its substrate protein. *J Biol Chem* 284, 12783-12791. 10.1074/jbc.M809207200.
  46. Bulgakov, O.V., Eggenschwiler, J.T., Hong, D.H., Anderson, K.V., and Li, T. (2004). FKBP8 is a negative regulator of mouse sonic hedgehog signaling in neural tissues. *Development* 131, 2149-2159. 10.1242/dev.01122.
  47. Cho, A., Ko, H.W., and Eggenschwiler, J.T. (2008). FKBP8 cell-autonomously controls neural tube patterning through a Gli2- and Kif3a-dependent mechanism. *Dev Biol* 321, 27-39. 10.1016/j.ydbio.2008.05.558.
  48. Wang, J., Tong, W., Zhang, X., Chen, L., Yi, Z., Pan, T., Hu, Y., Xiang, L., and Yuan, Z. (2006). Hepatitis C virus non-structural protein NS5A interacts with FKBP38 and inhibits apoptosis in Huh7 hepatoma cells. *FEBS Lett* 580, 4392-4400. 10.1016/j.febslet.2006.07.002.
  49. Shirane-Kitsuji, M., and Nakayama, K.I. (2014). Mitochondria: FKBP38 and mitochondrial degradation. *Int J Biochem Cell Biol* 51, 19-22. 10.1016/j.biocel.2014.03.007.
  50. Antonicka, H., Lin, Z.Y., Janer, A., Aaltonen, M.J., Weraarpachai, W., Gingras, A.C., and Shoubridge, E.A. (2020). A High-Density Human Mitochondrial Proximity Interaction Network. *Cell Metab* 32, 479-497.e479. 10.1016/j.cmet.2020.07.017.
  51. Suga, S., Nakamura, K., Humbel, B.M., Kawai, H., and Hirabayashi, Y. (2021). An interactive deep learning-based approach reveals mitochondrial cristae topologies. *bioRxiv*, 2021.2006.2011.448083. 10.1101/2021.06.11.448083.
  52. Conrad, R., and Narayan, K. (2023). Instance segmentation of mitochondria in electron microscopy images with a generalist deep learning model trained on a diverse dataset. *Cell Syst* 14, 58-71.e55. 10.1016/j.cels.2022.12.006.
  53. Ran, F.A., Hsu, P.D., Wright, J., Agarwala, V., Scott, D.A., and Zhang, F. (2013). Genome engineering using the CRISPR-Cas9 system. *Nat Protoc* 8, 2281-2308. 10.1038/nprot.2013.143.
  54. Tanaka, H., Okazaki, T., Aoyama, S., Yokota, M., Koike, M., Okada, Y., Fujiki, Y., and Gotoh, Y. (2019). Peroxisomes control mitochondrial dynamics and the mitochondrion-dependent apoptosis pathway. *J Cell Sci* 132. 10.1242/jcs.224766.
  55. Ohtsuka, M., Sato, M., Miura, H., Takabayashi, S., Matsuyama, M., Koyano, T., Arifin, N., Nakamura, S., Wada, K., and Gurumurthy, C.B. (2018). i-GONAD: a robust method for in situ germline genome engineering using CRISPR nucleases. *Genome Biol* 19, 25. 10.1186/s13059-018-1400-x.
  56. Blundell, K.L., Pal, M., Roe, S.M., Pearl, L.H., and Prodromou, C. (2017). The structure of FKBP38 in complex with the MEEVD tetratricopeptide binding-motif of Hsp90. *PLoS One* 12, e0173543. 10.1371/journal.pone.0173543.
  57. Kwon, S.K., Sando, R., Lewis, T.L., Hirabayashi, Y., Maximov, A., and Polleux, F. (2016). LKB1 Regulates Mitochondria-Dependent Presynaptic Calcium Clearance and Neurotransmitter Release Properties at

- Excitatory Synapses along Cortical Axons. *PLoS Biol* 14, e1002516. 10.1371/journal.pbio.1002516.
58. Sun, Y., Yu, Z., Obara, C.J., Mittal, K., Lippincott-Schwartz, J., and Koslover, E.F. (2022). Unraveling trajectories of diffusive particles on networks. *Physical Review Research* 4, 023182. 10.1103/PhysRevResearch.4.023182.
  59. Grimm, J.B., English, B.P., Choi, H., Muthusamy, A.K., Mehl, B.P., Dong, P., Brown, T.A., Lippincott-Schwartz, J., Liu, Z., Lionnet, T., and Lavis, L.D. (2016). Bright photoactivatable fluorophores for single-molecule imaging. *Nat Methods* 13, 985-988. 10.1038/nmeth.4034.
  60. Takahashi, S., Saito, C., Koyama-Honda, I., and Mizushima, N. (2022). Quantitative 3D correlative light and electron microscopy of organelle association during autophagy. *Cell Struct Funct* 47, 89-99. 10.1247/csf.22071.
  61. Mastronarde, D.N. (2003). SerialEM: A Program for Automated Tilt Series Acquisition on Tecnai Microscopes Using Prediction of Specimen Position. *Microscopy and Microanalysis* 9, 1182-1183. 10.1017/s1431927603445911.
  62. Tegunov, D., and Cramer, P. (2019). Real-time cryo-electron microscopy data preprocessing with Warp. *Nat Methods* 16, 1146-1152. 10.1038/s41592-019-0580-y.
  63. Liu, Y.T., Zhang, H., Wang, H., Tao, C.L., Bi, G.Q., and Zhou, Z.H. (2022). Isotropic reconstruction for electron tomography with deep learning. *Nat Commun* 13, 6482. 10.1038/s41467-022-33957-8.
  64. Martinez-Sanchez, A., Garcia, I., Asano, S., Lucic, V., and Fernandez, J.J. (2014). Robust membrane detection based on tensor voting for electron tomography. *J Struct Biol* 186, 49-61. 10.1016/j.jsb.2014.02.015.
  65. Nishino, K., Yoshikawa, H., Motani, K., and Kosako, H. (2022). Optimized Workflow for Enrichment and Identification of Biotinylated Peptides Using Tamavidin 2-REV for BioID and Cell Surface Proteomics. *J Proteome Res* 21, 2094-2103. 10.1021/acs.jproteome.2c00130.
  66. Nesvizhskii, A.I., Keller, A., Kolker, E., and Aebersold, R. (2003). A statistical model for identifying proteins by tandem mass spectrometry. *Anal Chem* 75, 4646-4658. 10.1021/ac0341261.
  67. Ashburner, M., Ball, C.A., Blake, J.A., Botstein, D., Butler, H., Cherry, J.M., Davis, A.P., Dolinski, K., Dwight, S.S., Eppig, J.T., et al. (2000). Gene ontology: tool for the unification of biology. The Gene Ontology Consortium. *Nat Genet* 25, 25-29. 10.1038/75556.

**Figure 1**

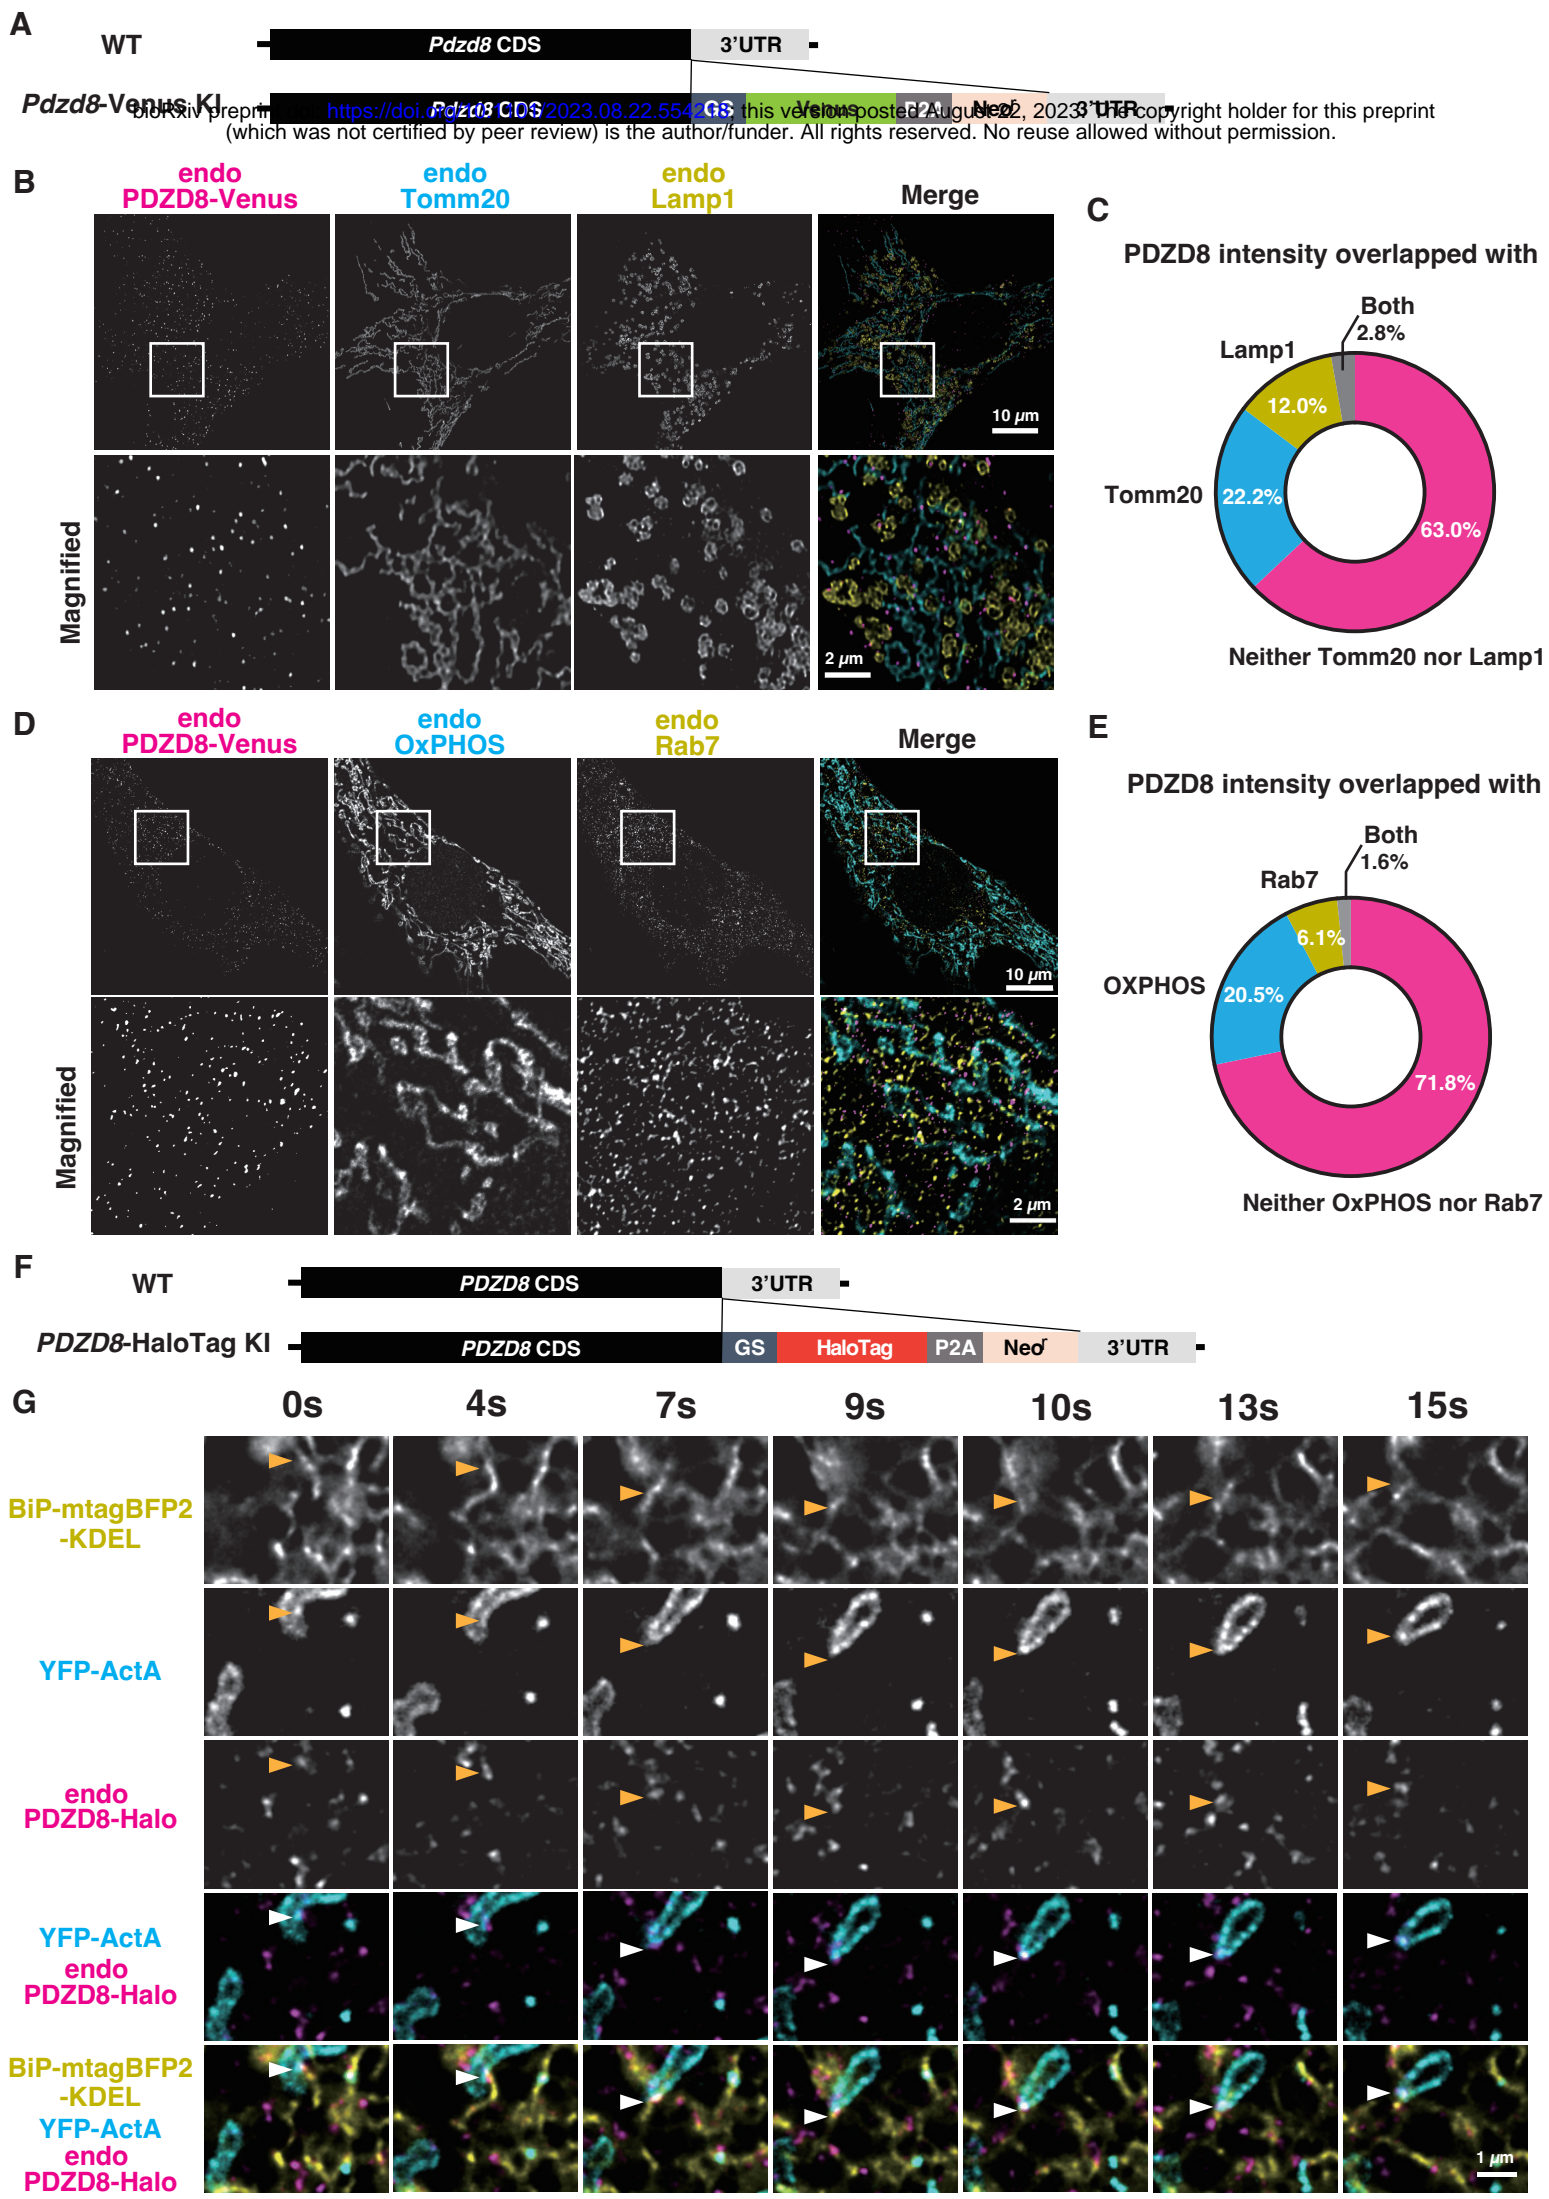

bioRxiv preprint doi: <https://doi.org/10.1101/2023.08.22.554165>; this version posted August 22, 2023. The copyright holder for this preprint (which was not certified by peer review) is the author/funder. All rights reserved. No reuse allowed without permission.

Figure 2

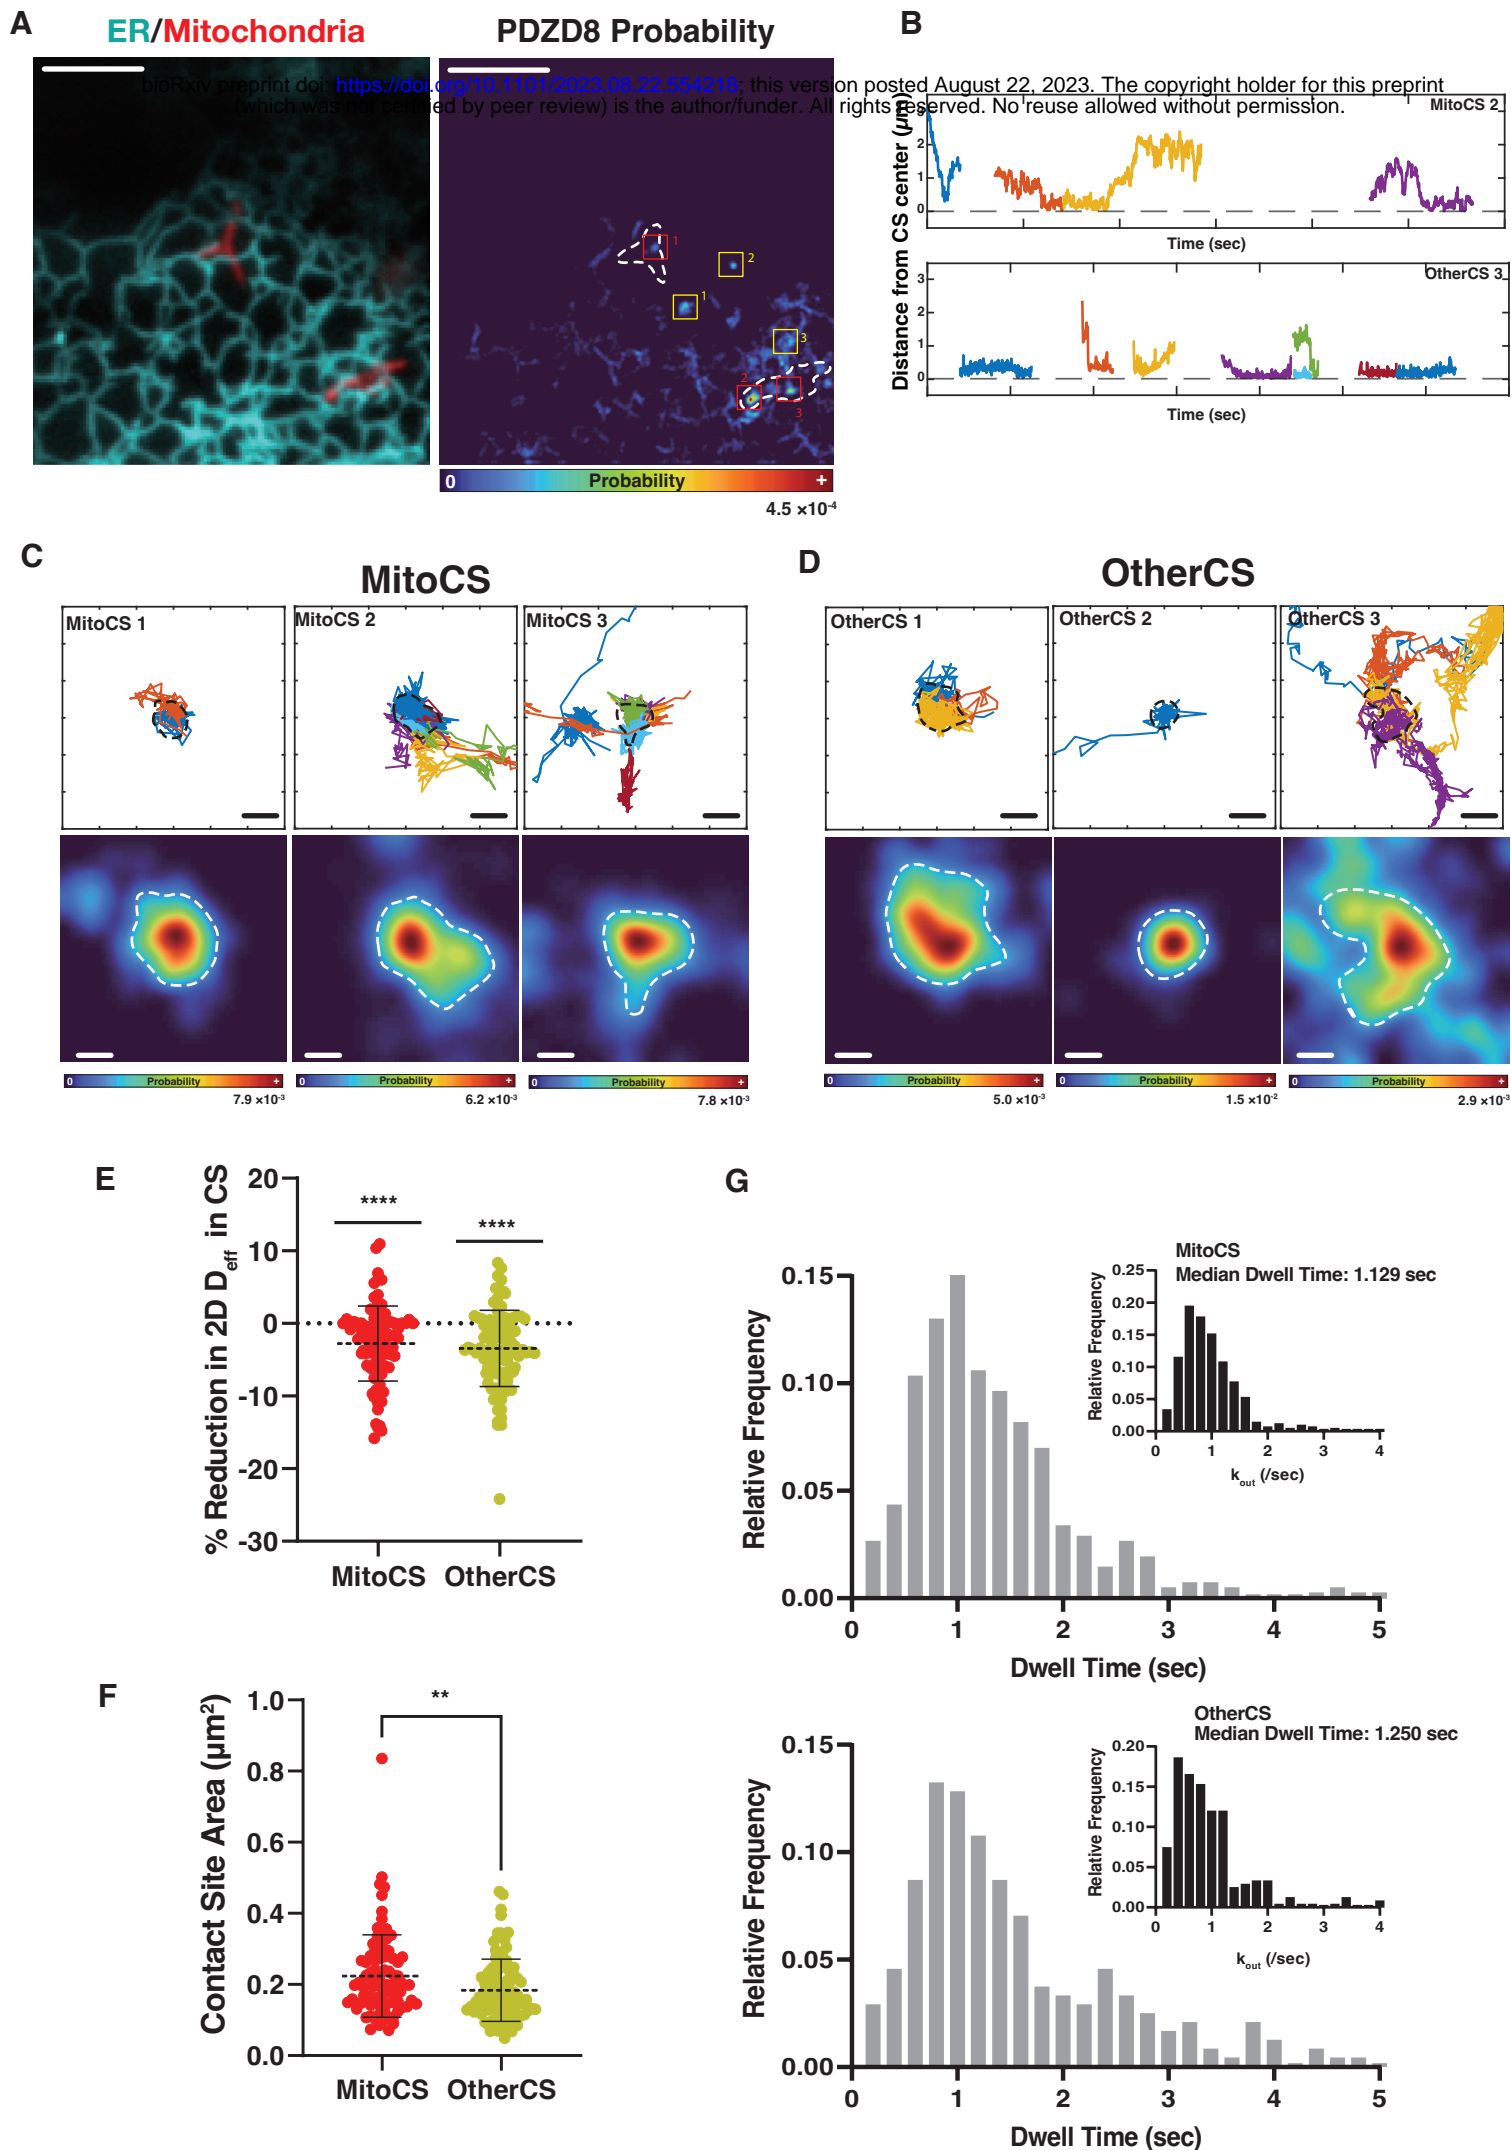



### Figure 3

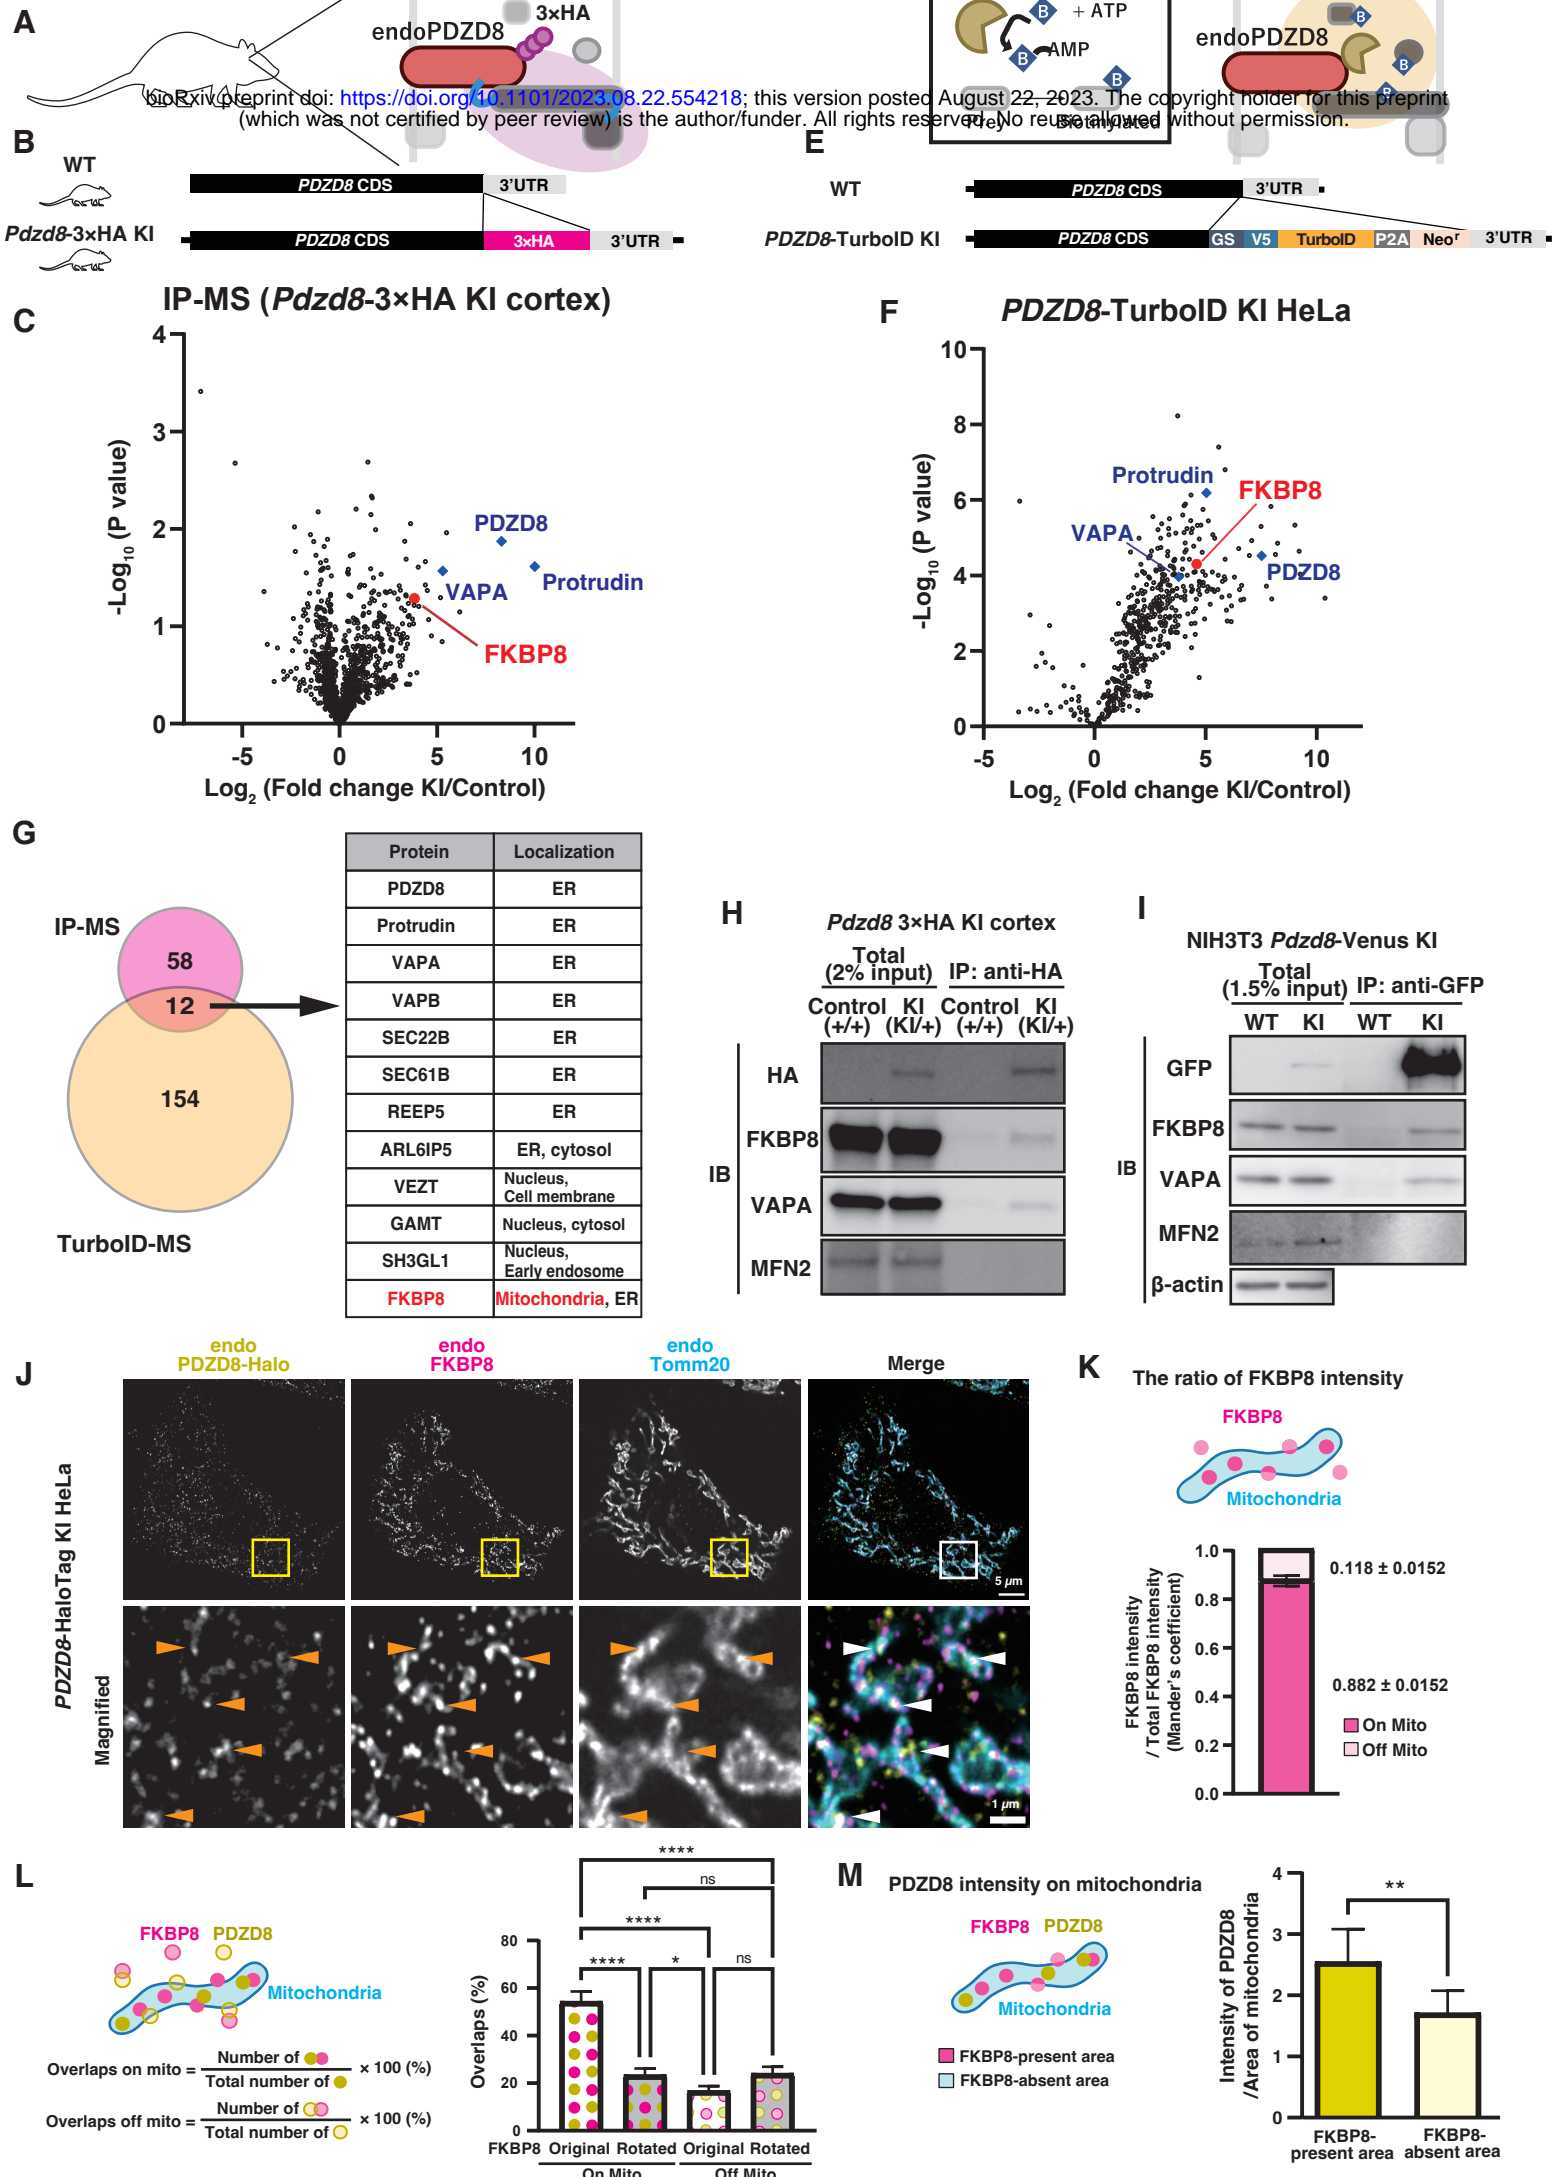

**Figure 4**

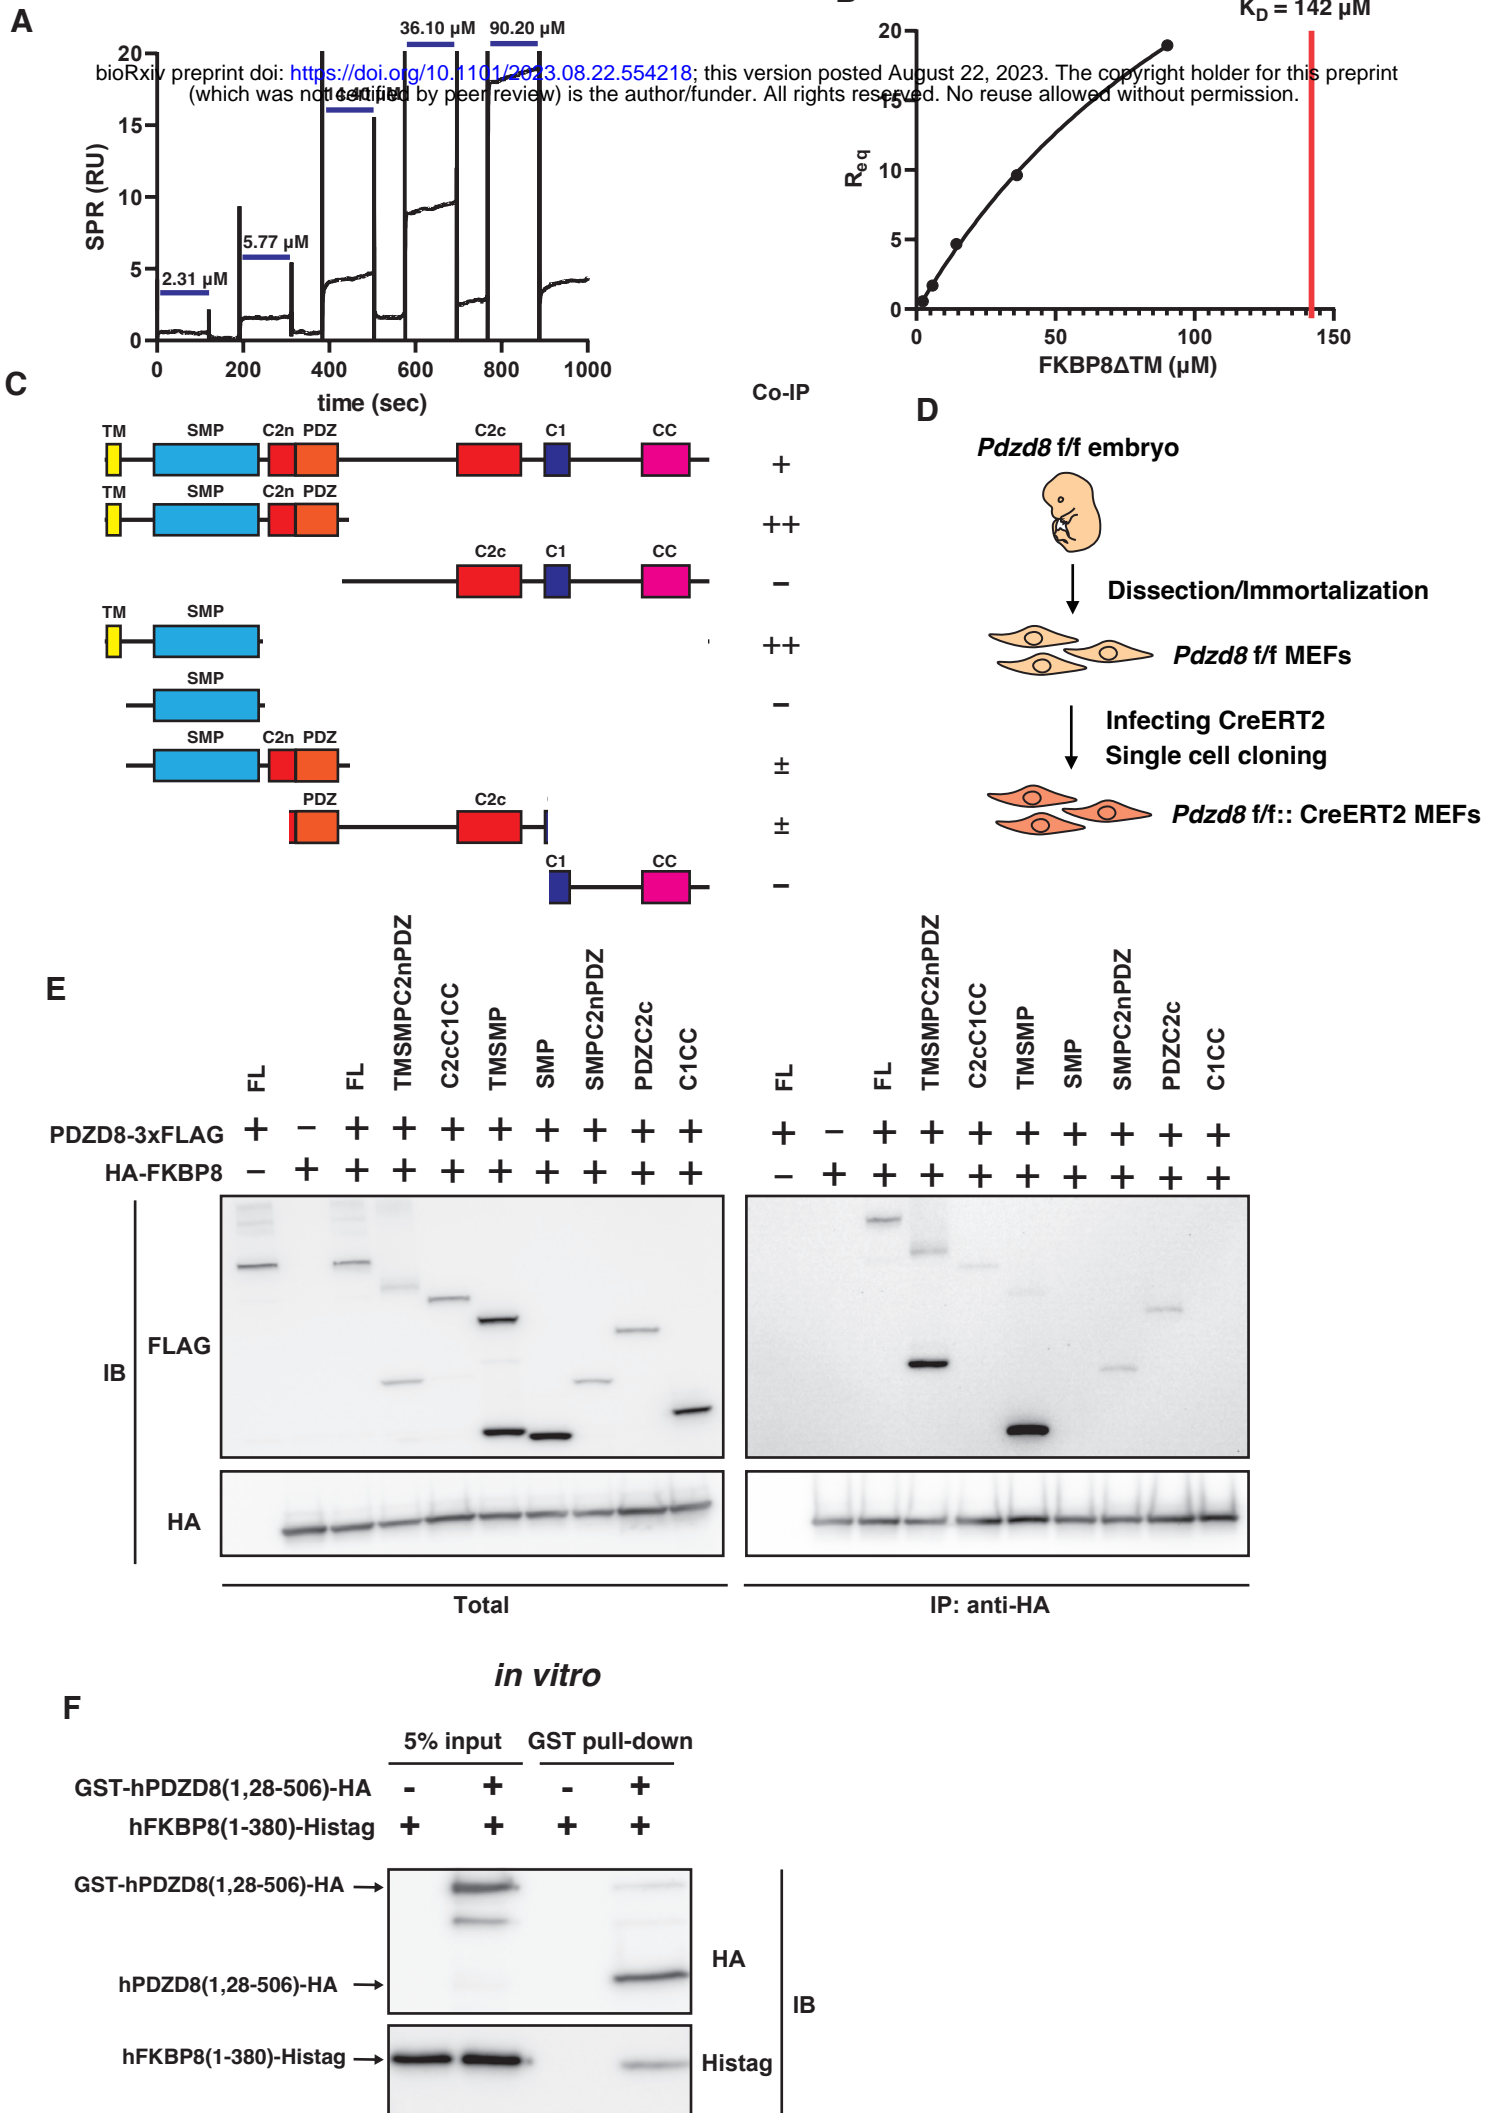

**Figure 5**

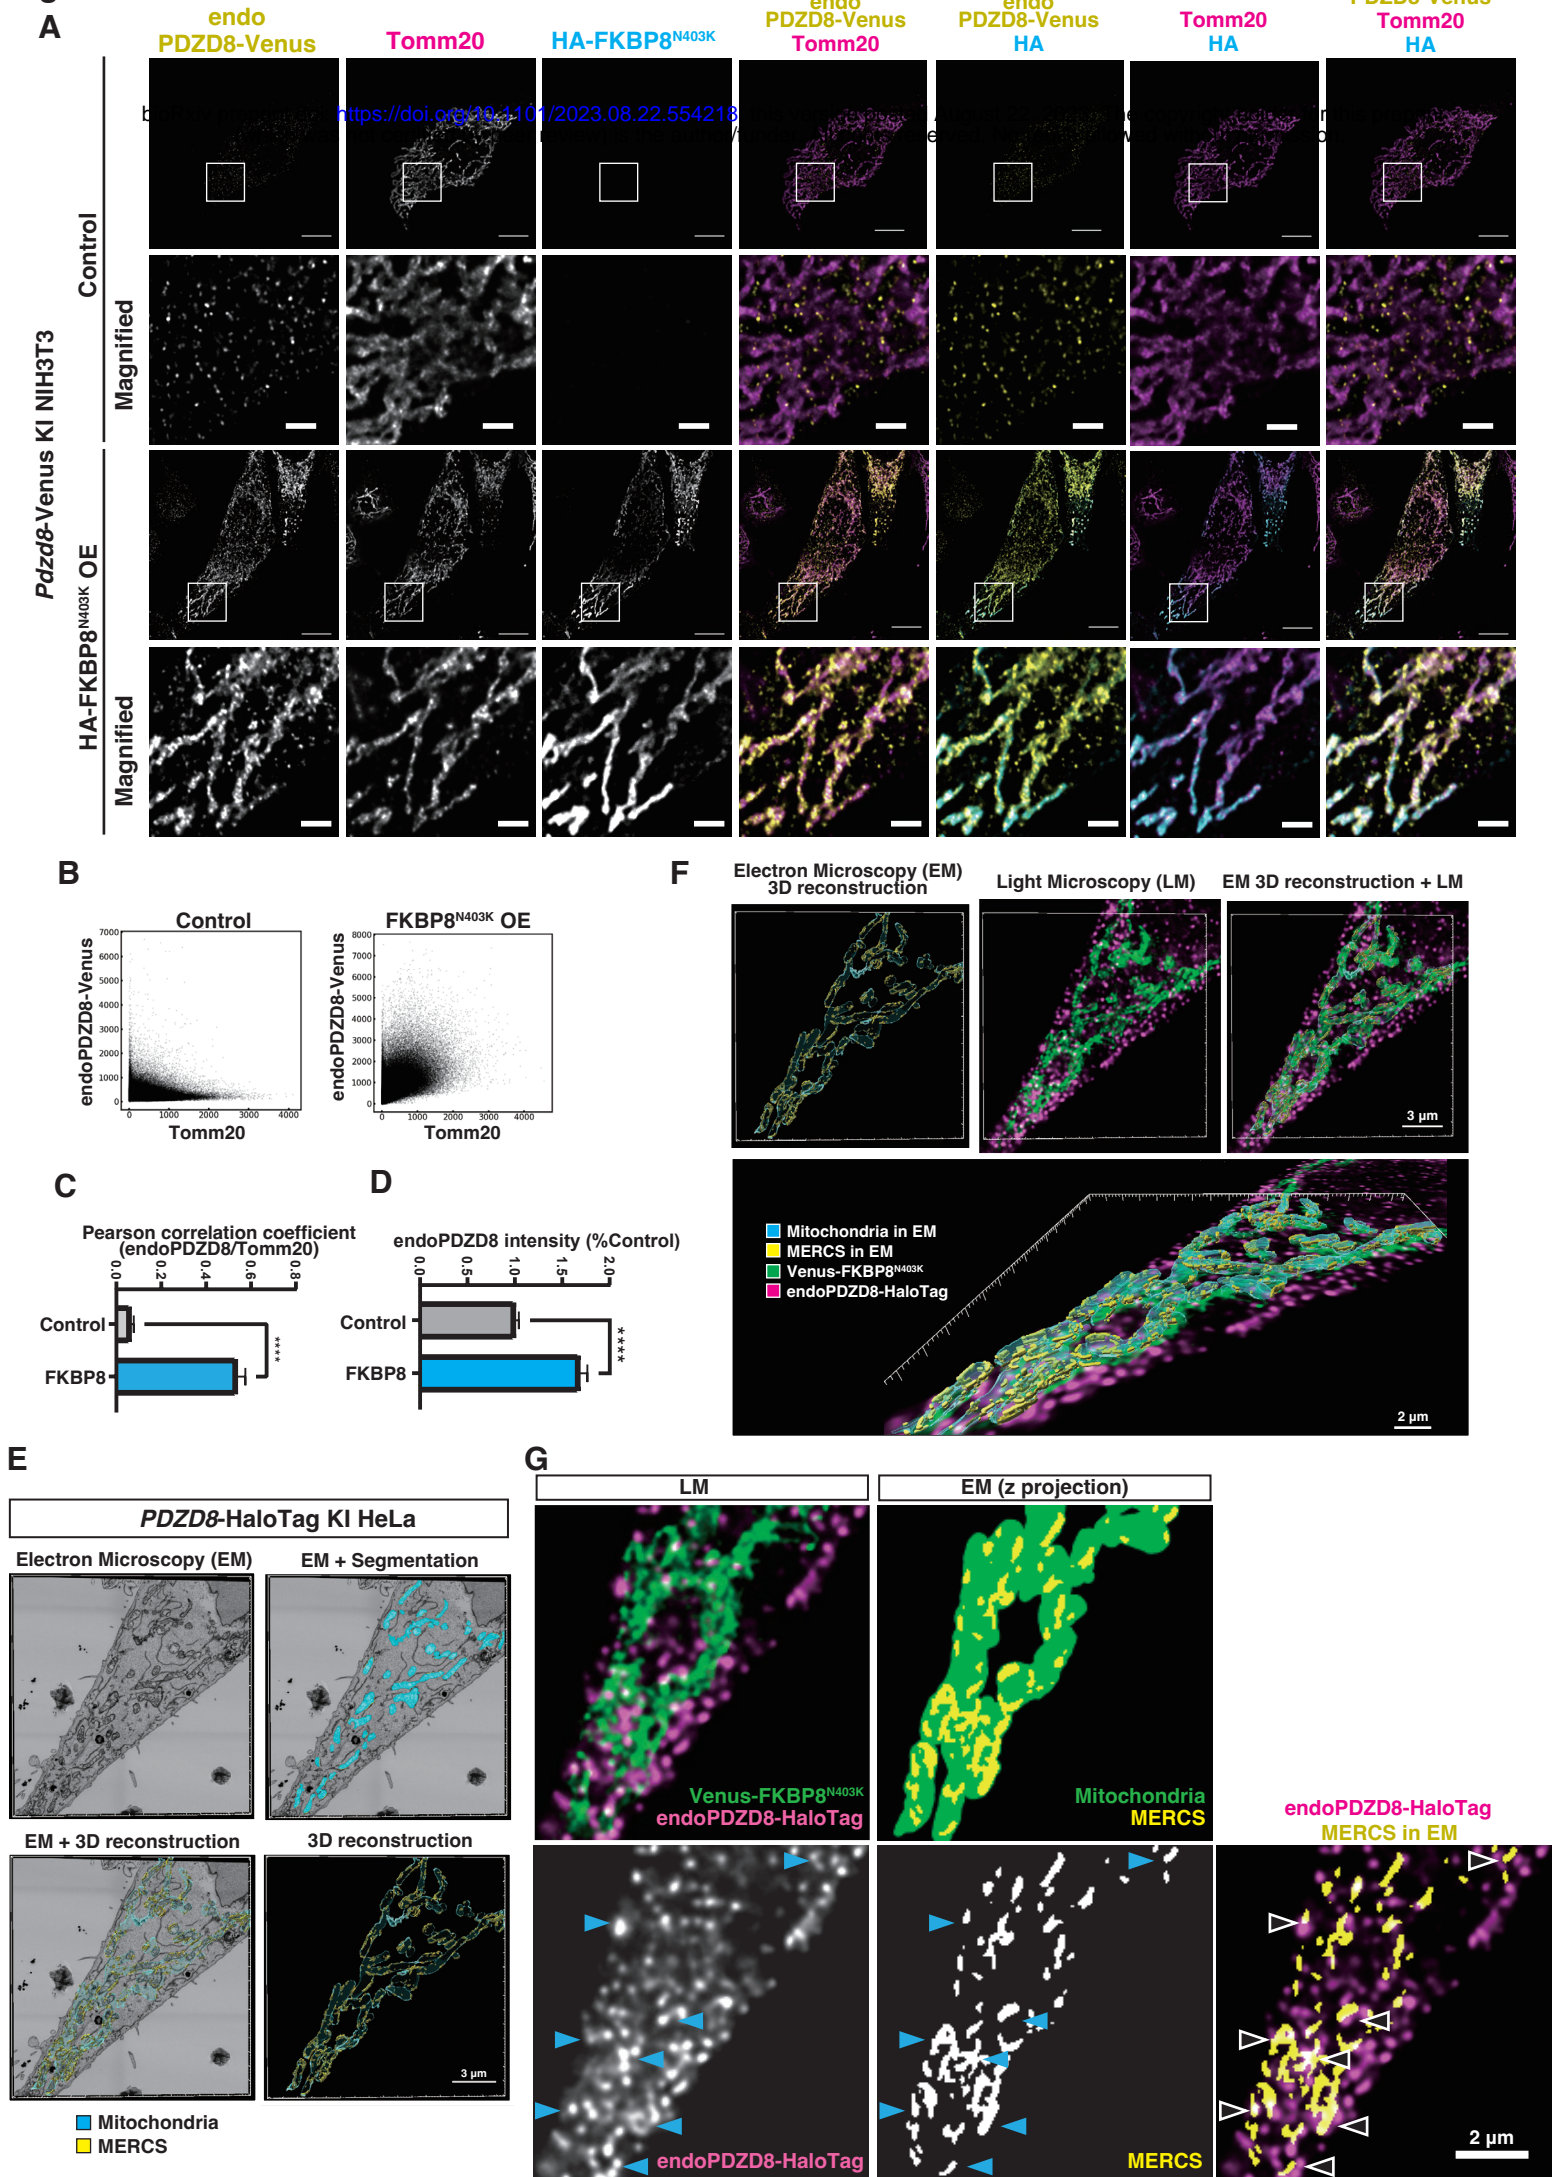

**Figure 6**

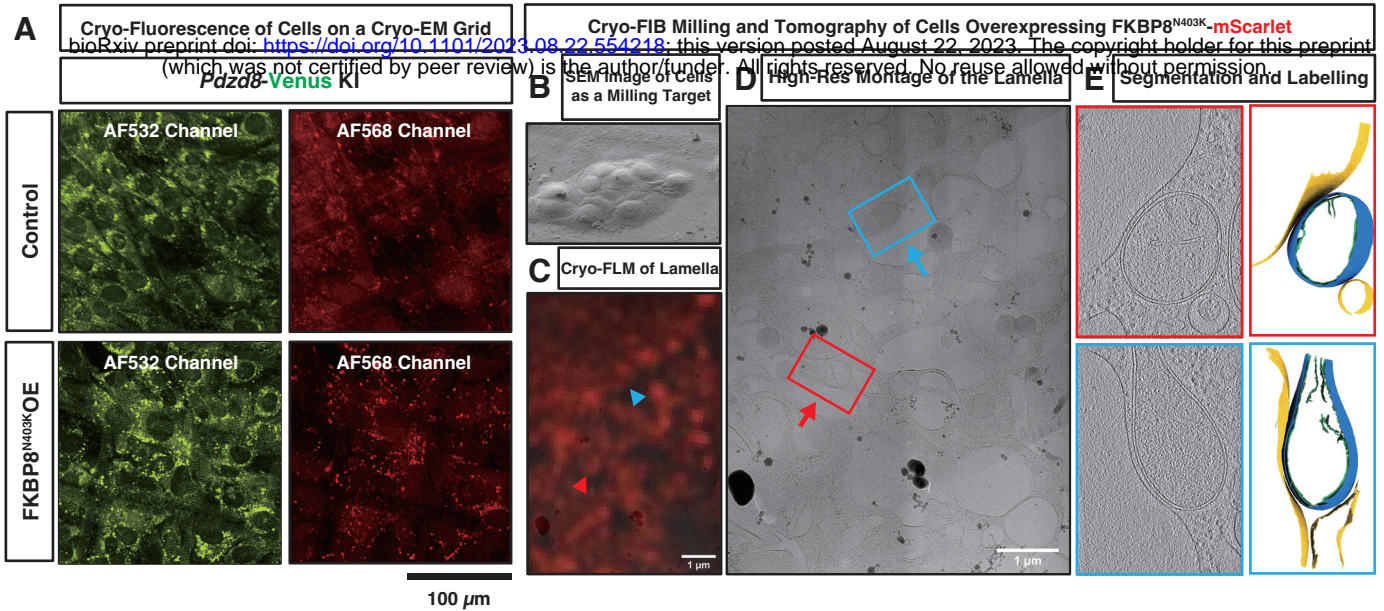

**F** Heat Map of Distance from OMM Overlaid on ER for Four Exemplar Tomograms

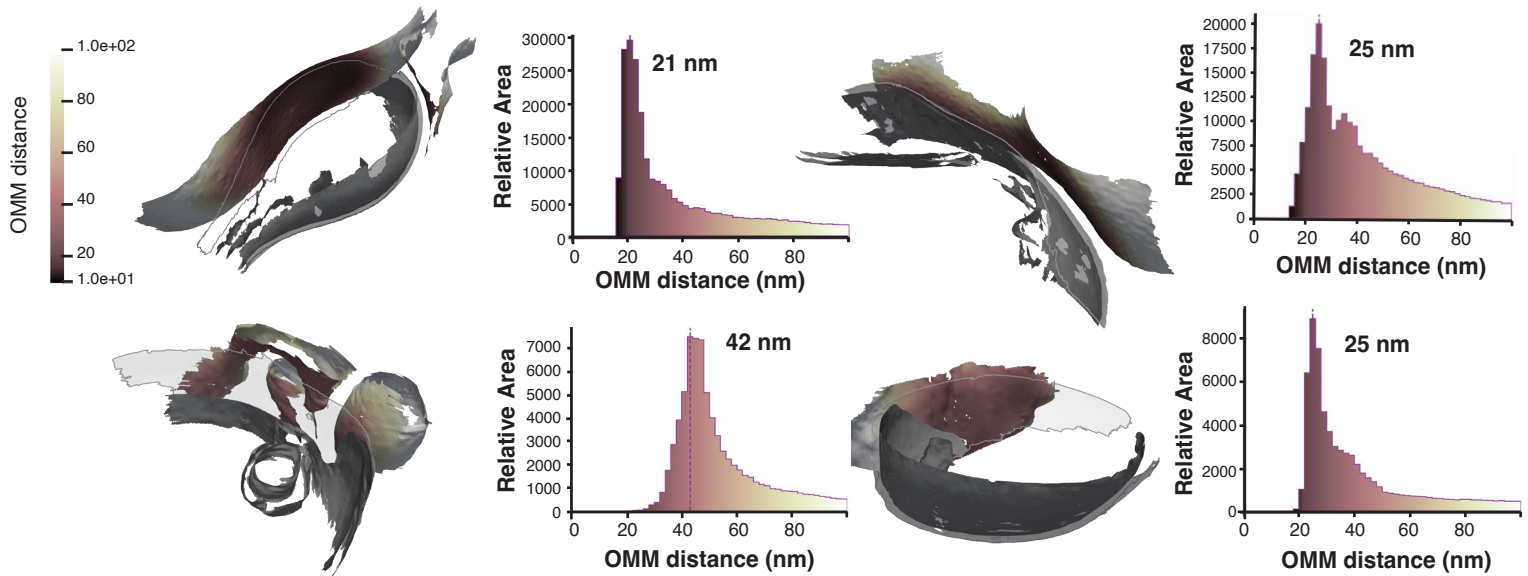

**G** Surface Area Weighted Histogram of OMM-ER Distances from all Tomograms

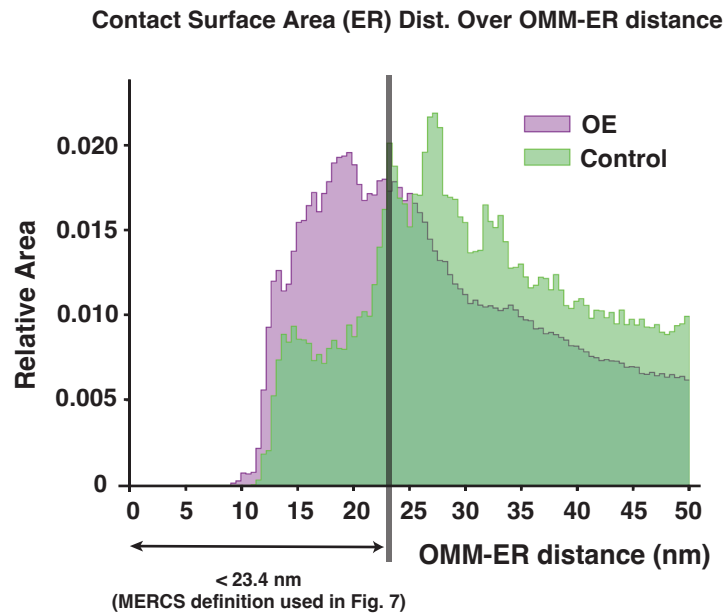

Figure 7

A

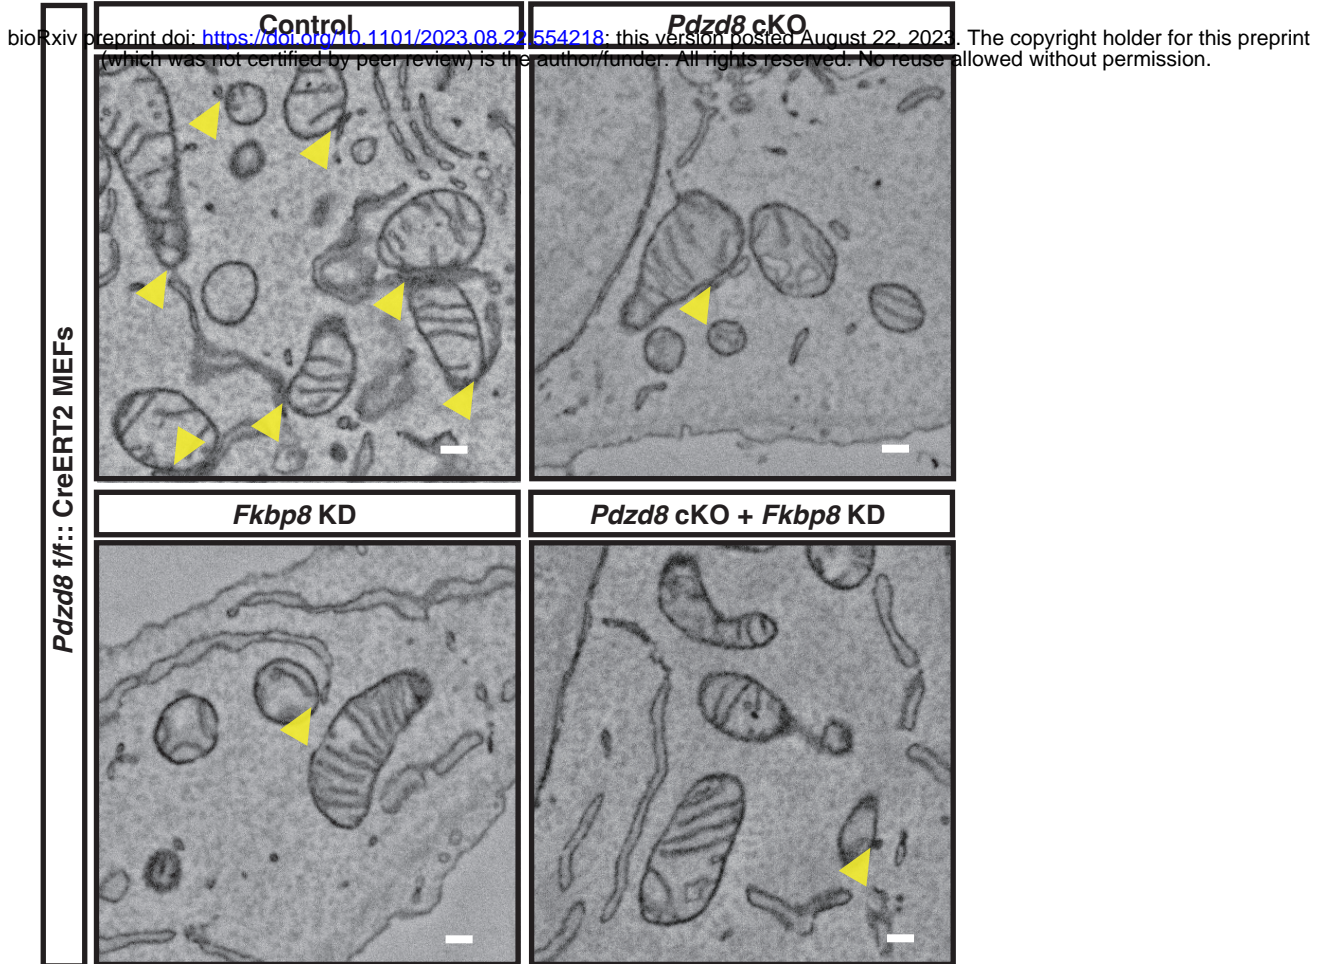

B

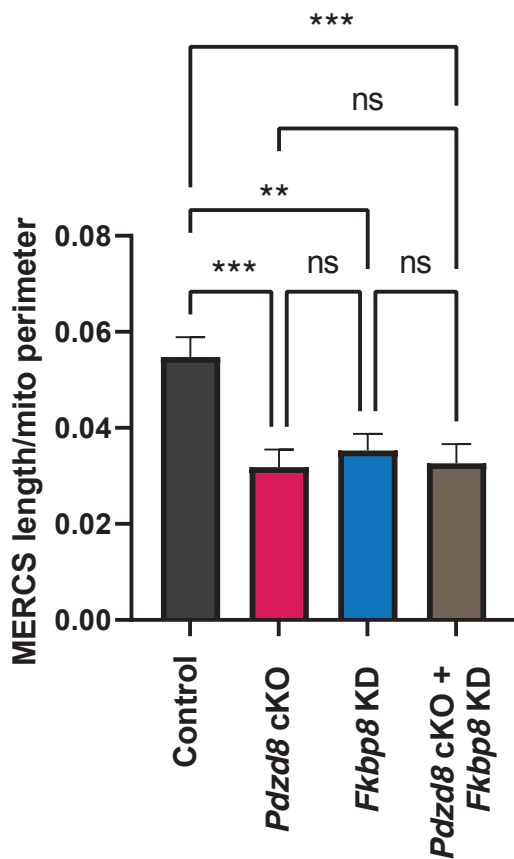

C

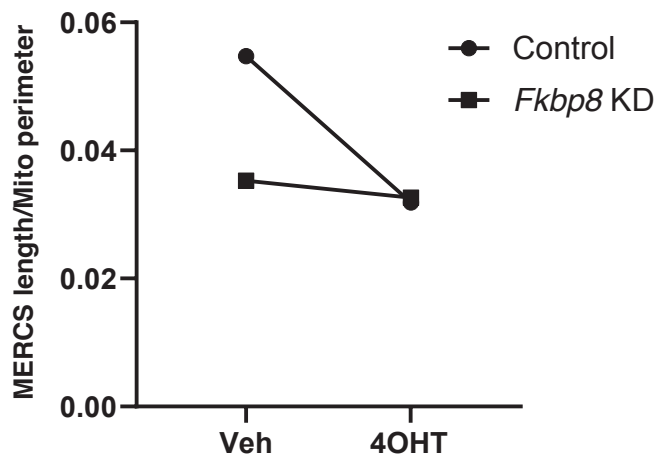

D

| Source of Variation | P value |
|---------------------|---------|
| <i>Pdzd8</i>        | 0.0013  |
| <i>Fkbp8</i>        | 0.0169  |
| Interaction         | 0.0098  |

# Supplemental Figure 1

**A** bioRxiv preprint doi: <https://doi.org/10.1101/2023.08.22.554218>; this version posted August 22, 2023. The copyright holder for this preprint (which was not certified by peer review) is the author/funder. All rights reserved. No reuse allowed without permission.

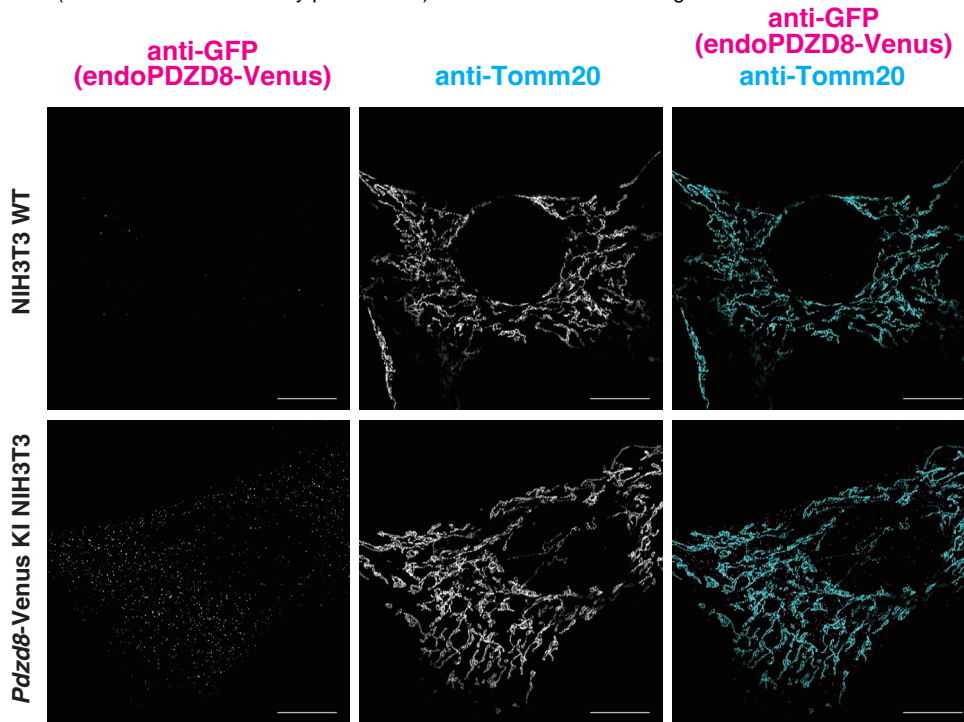

**B**

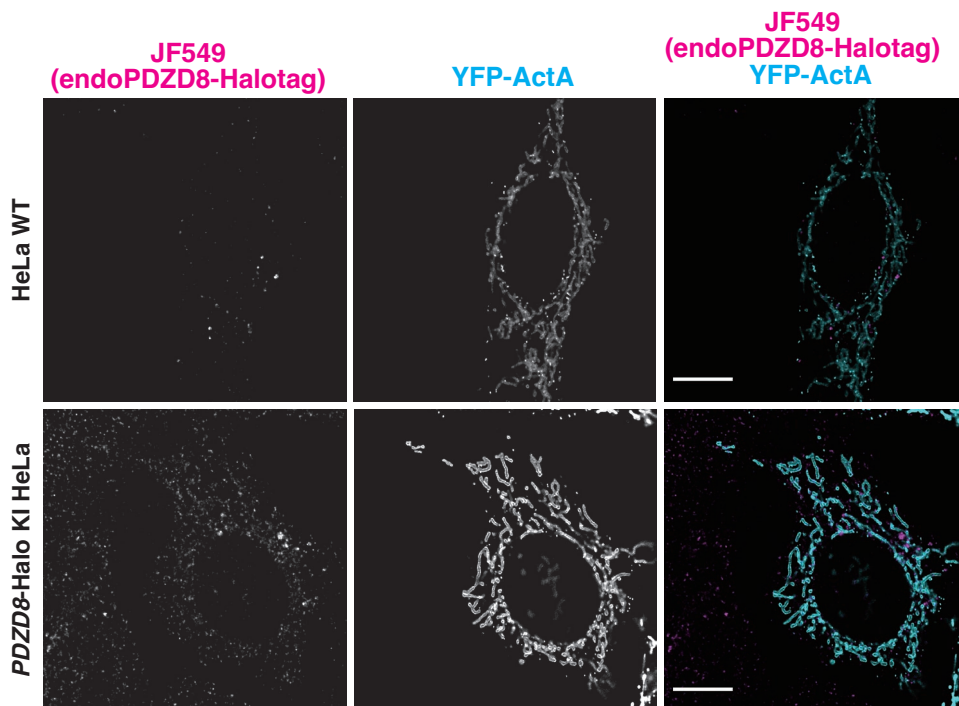

## Supplemental Figure 2

### MitoCS

A **bioRxiv** preprint doi: <https://doi.org/10.1101/2023.08.22.554218>; this version posted August 22, 2023. The copyright holder for this preprint (which was not certified by peer review) is the author/funder. All rights reserved. No reuse allowed without permission.

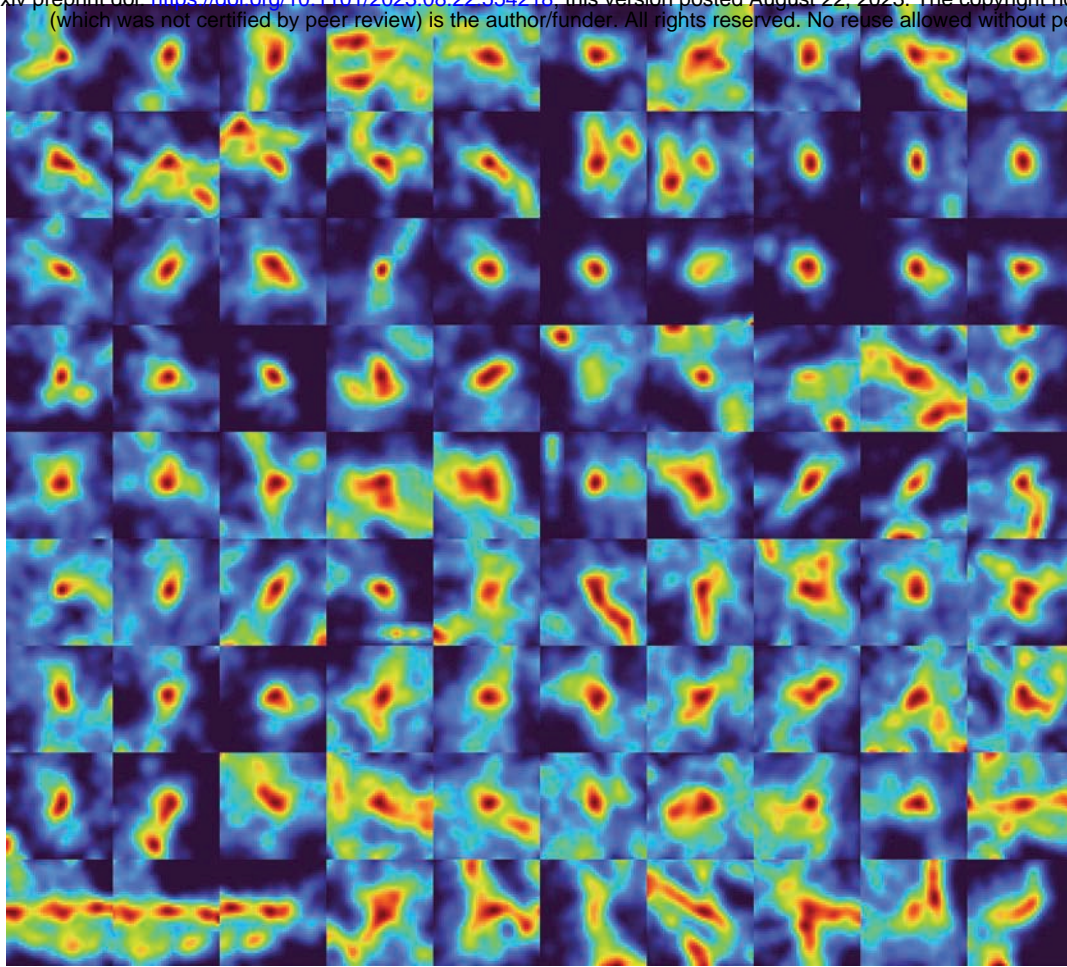

B

### OtherCS

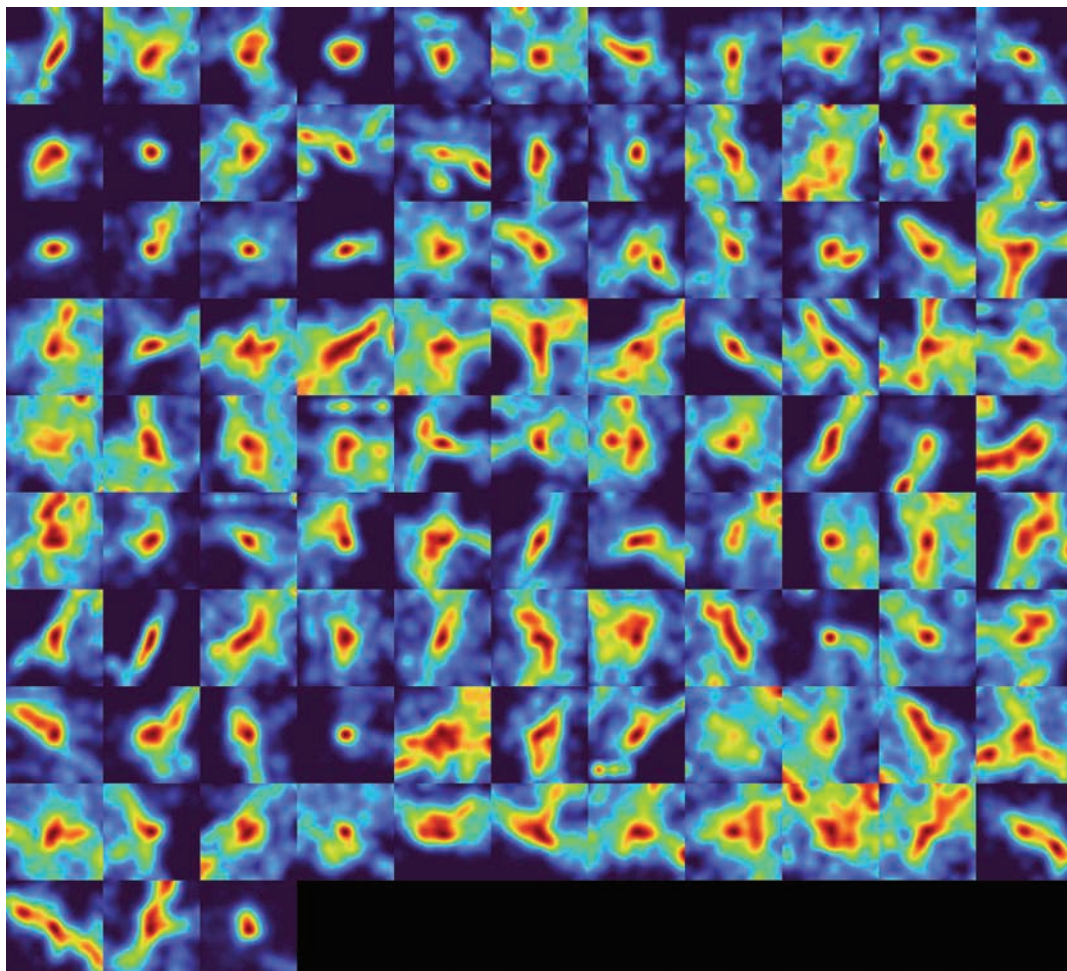

# Supplemental Figure 3

## A *Pdzd8* (mouse)

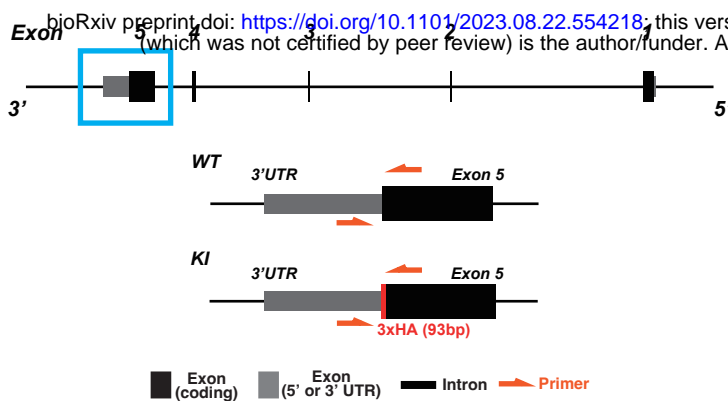

## B *Pdzd8*-3xHA KI

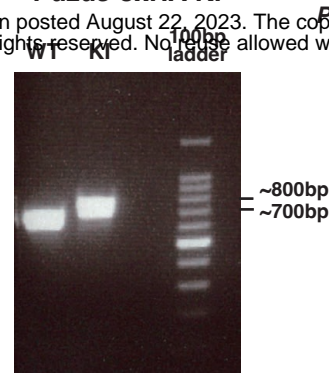

## C *Pdzd8*-v5-TurboID KI Neuro2a

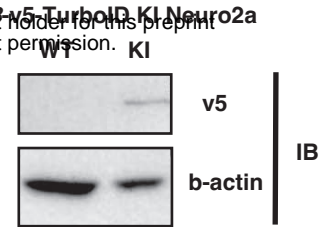

## D Genes detected in *Pdzd8*-v5-TurboID KI Neuro2a

|                   |                 |
|-------------------|-----------------|
| <i>Pdzd8</i>      | <i>Mars</i>     |
| <i>Dock7</i>      | <i>Coro1c</i>   |
| <i>Hells</i>      | <i>Dbn1</i>     |
| <i>Emd</i>        | <i>Gga1</i>     |
| <i>Vapa</i>       | <i>Casp3</i>    |
| <i>lap</i>        | <i>Zc3hav1</i>  |
| <i>Tagln2</i>     | <i>Crip1</i>    |
| <i>Srpra</i>      | <i>Plaa</i>     |
| <i>Rtn4</i>       | <i>Pdap1</i>    |
| <i>Lbr</i>        | <i>Bcap31</i>   |
| <i>Pak2</i>       | <i>Marcks11</i> |
| <i>Tmpo</i>       | <i>Asz1</i>     |
| <i>Sf3b3</i>      | <i>Fkbp8</i>    |
| <i>Sec22b</i>     | <i>Mccc1</i>    |
| <i>Eef1a1</i>     | <i>Sec61b</i>   |
| <i>Agfg1</i>      | <i>Tmem131</i>  |
| <i>Jpt2</i>       | <i>Ica1</i>     |
| <i>Stbd1</i>      | <i>Use1</i>     |
| <i>Rplp2</i>      | <i>Eif3d</i>    |
| <i>Eif4g1</i>     | <i>Synrg</i>    |
| <i>Rpn1</i>       | <i>Sncb</i>     |
| <i>V5-TurboID</i> | <i>Tmem209</i>  |
| <i>Ctnn</i>       | <i>Maco1</i>    |
| <i>Ranbp2</i>     | <i>Cplx1</i>    |
| <i>Ankle2</i>     | <i>Ermp1</i>    |
| <i>Vcpip1</i>     | <i>Vma21</i>    |
| <i>Tmcc1</i>      | <i>Spart</i>    |
| <i>Mtdh</i>       | <i>Spats2</i>   |
| <i>Rrbp1</i>      | <i>Nacad</i>    |
| <i>Gpatch1</i>    |                 |

## F

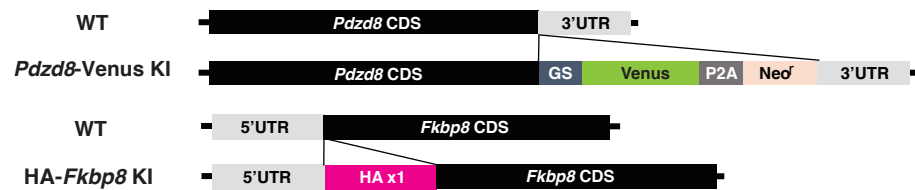

## G

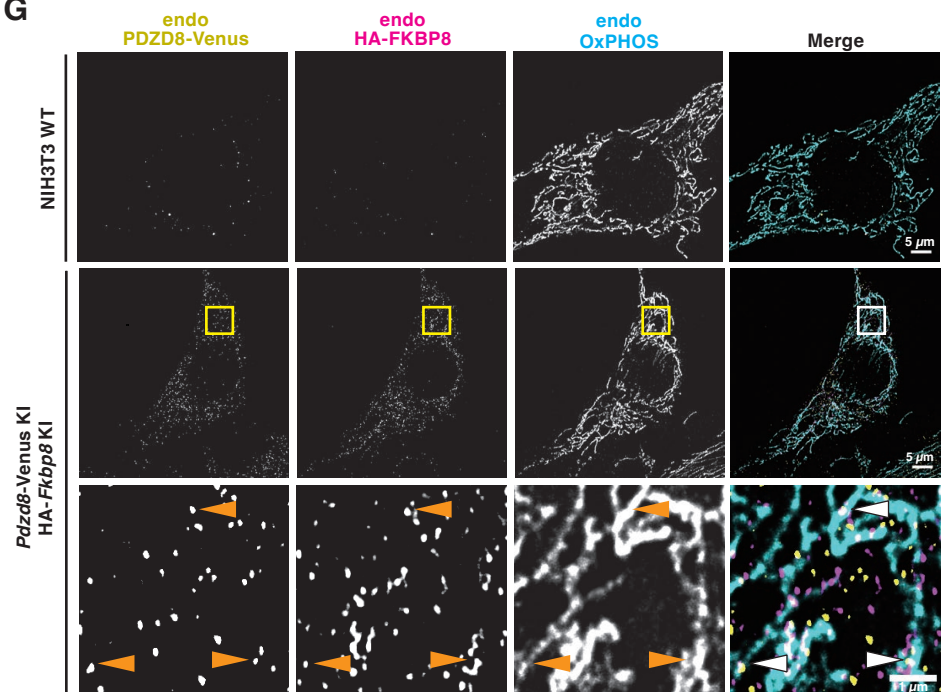

## E anti-FKBP8 anti-Tomm20 Merge

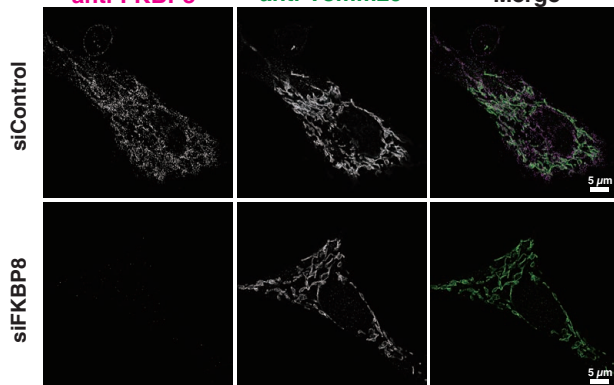

## H

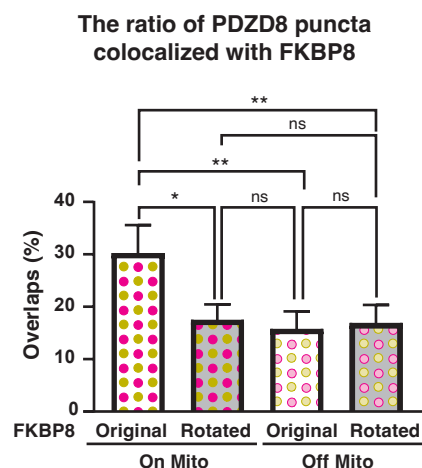

## I

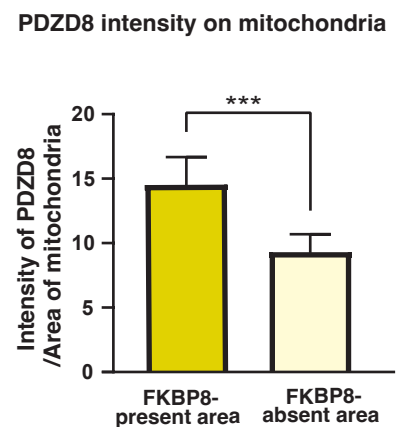



# Supplemental Figure 4

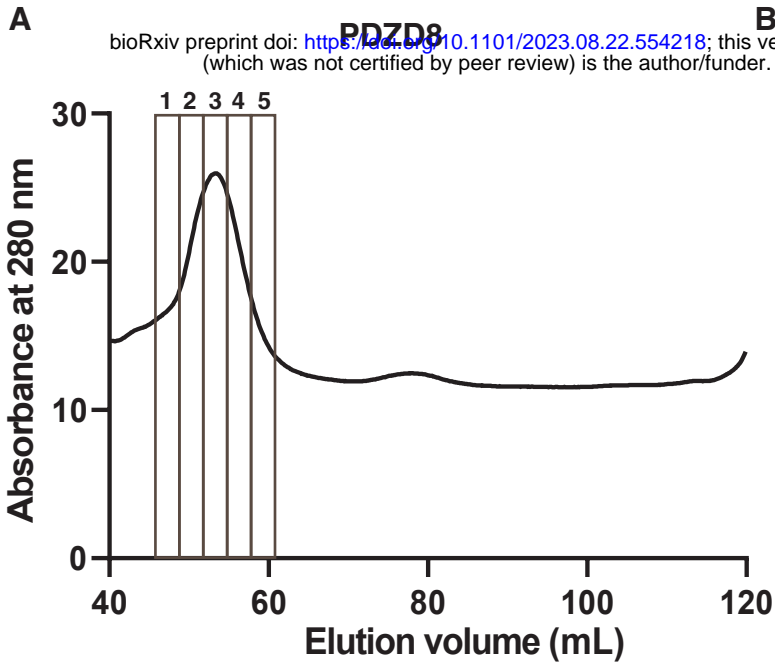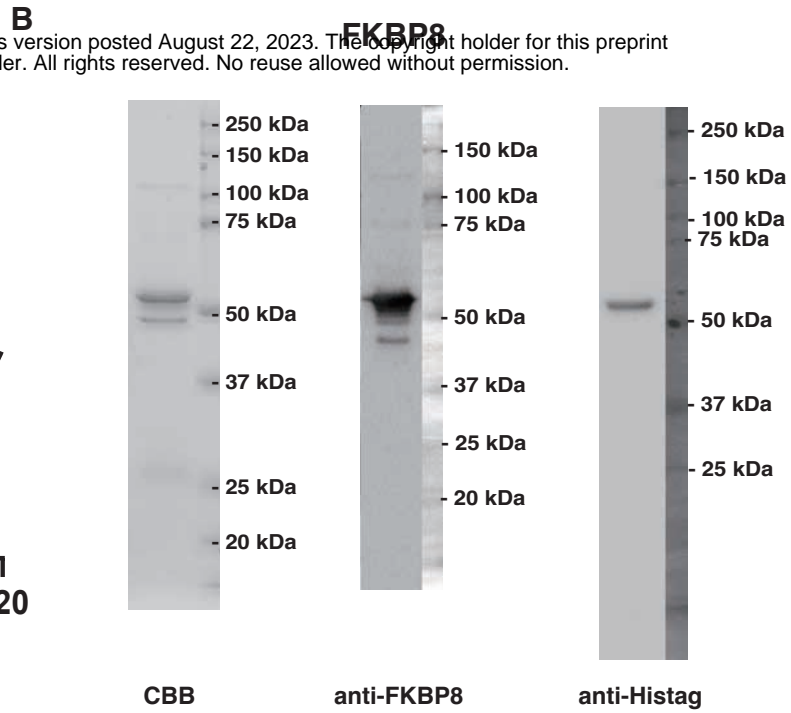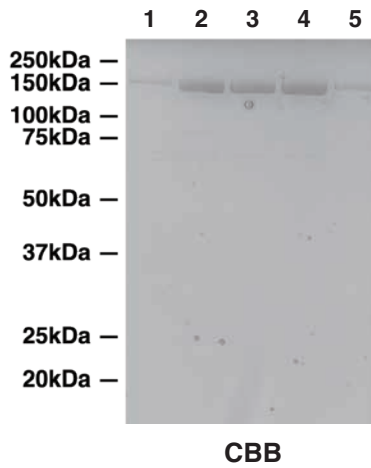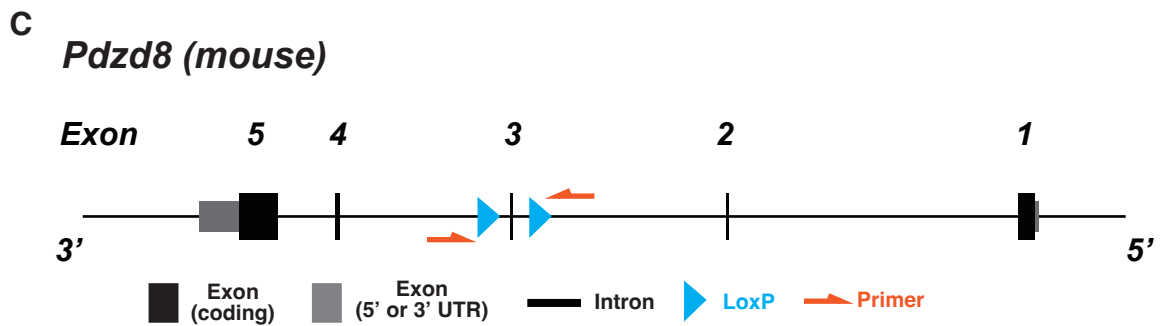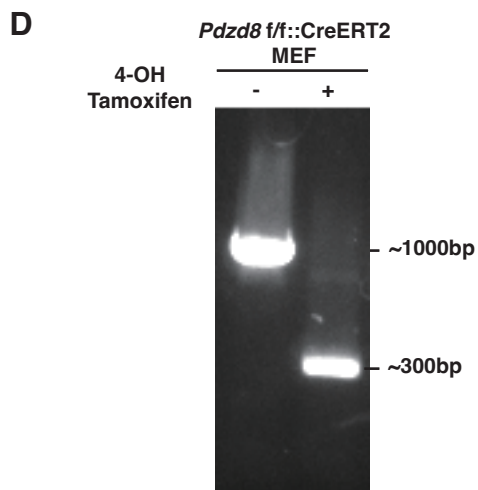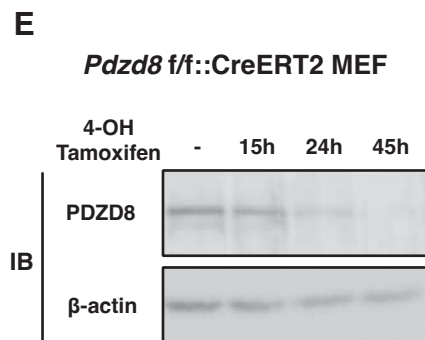

# Supplemental Figure 5

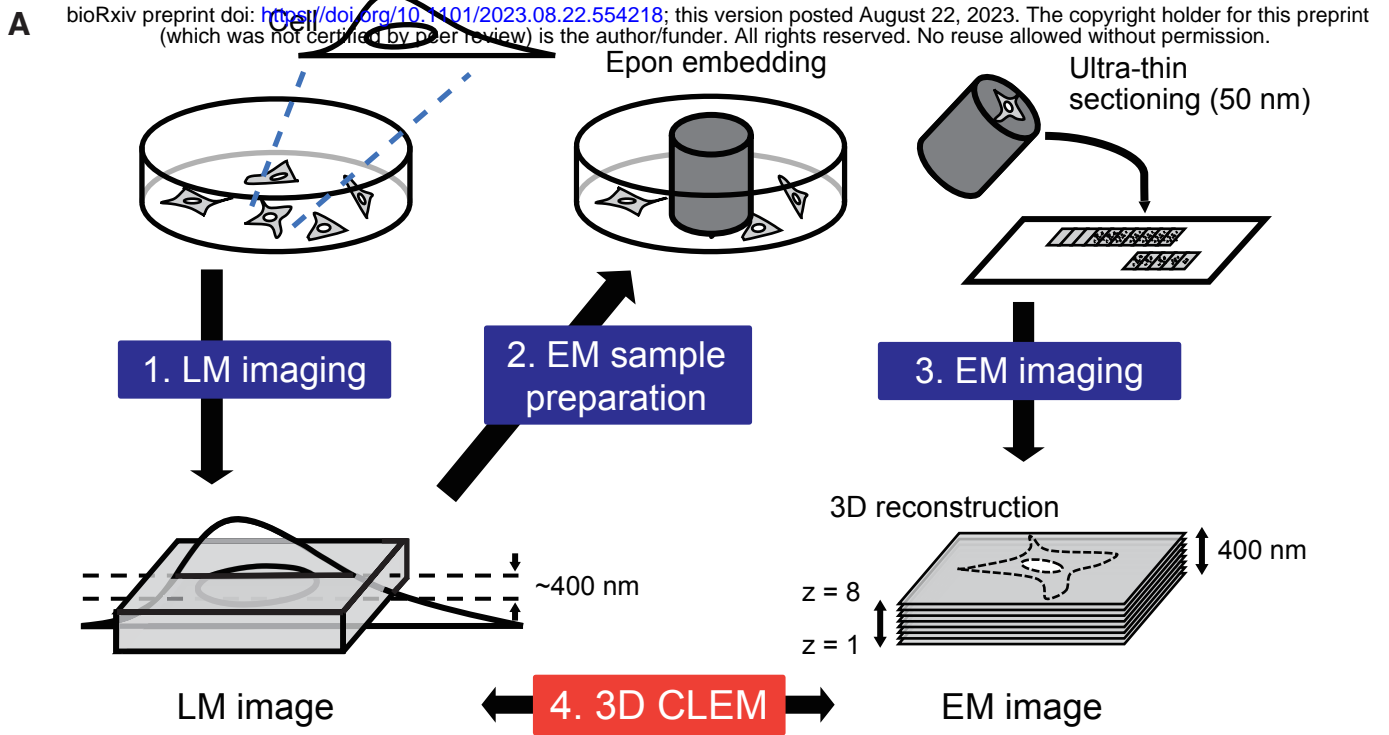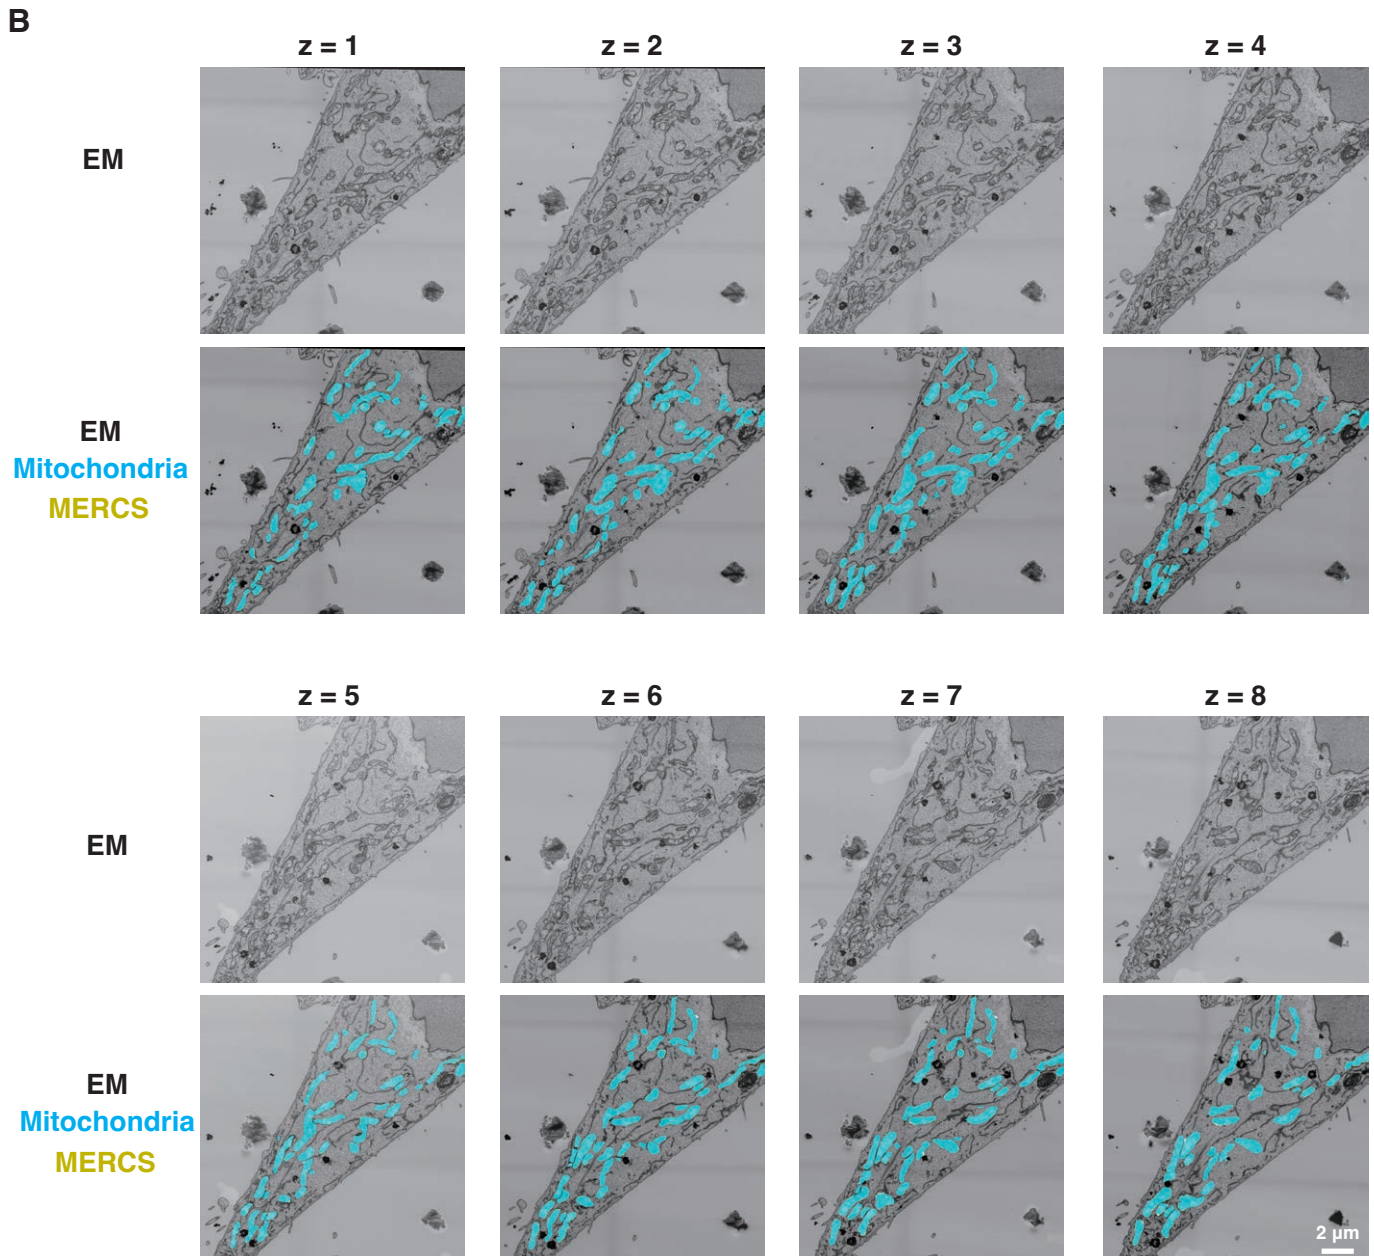

# Supplemental Figure 6

## FKBP8<sup>N403K</sup> Overexpression

**A**

bioRxiv preprint doi: <https://doi.org/10.1101/2023.08.22.554218>; this version posted August 22, 2023. The copyright holder for this preprint (which was not certified by peer review) is the author/funder. All rights reserved. No reuse allowed without permission.

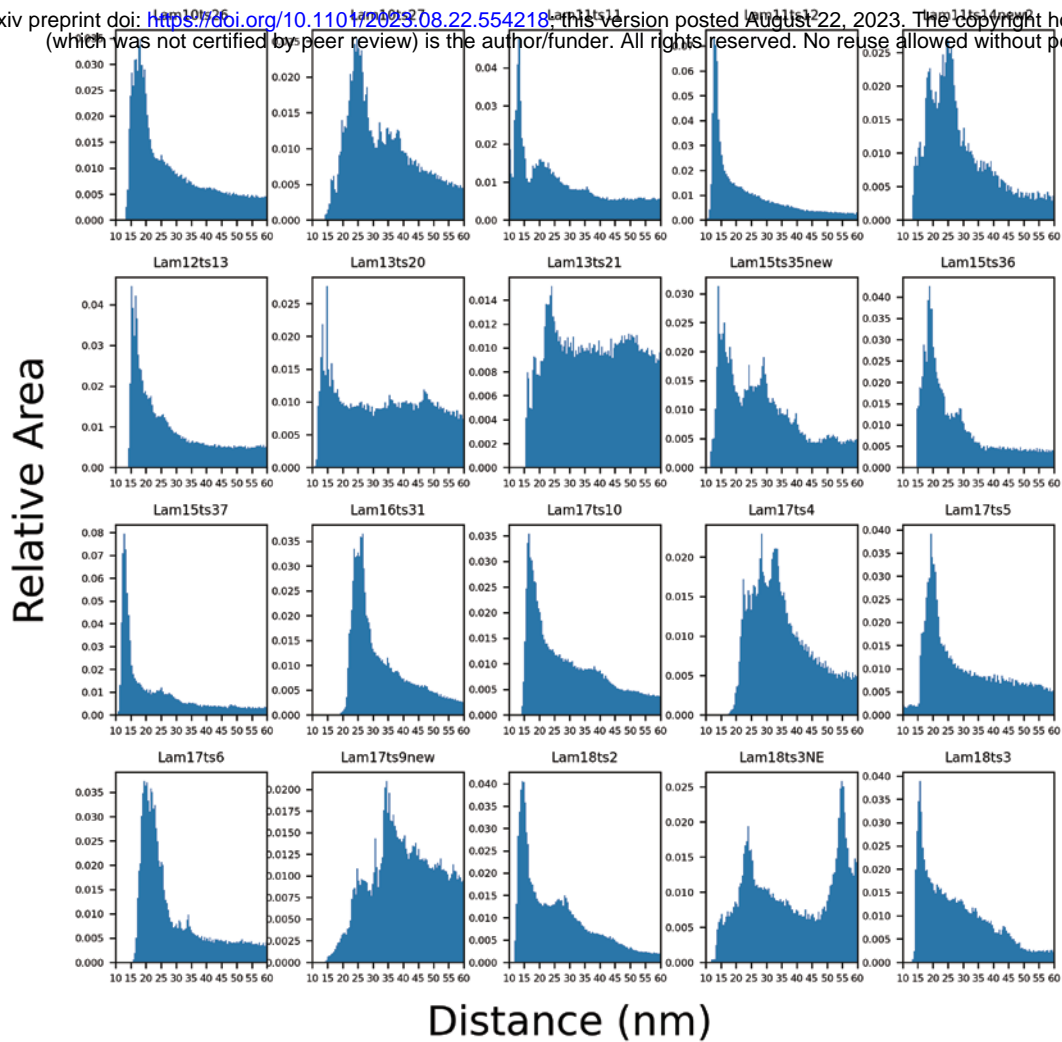

**B**

## Control

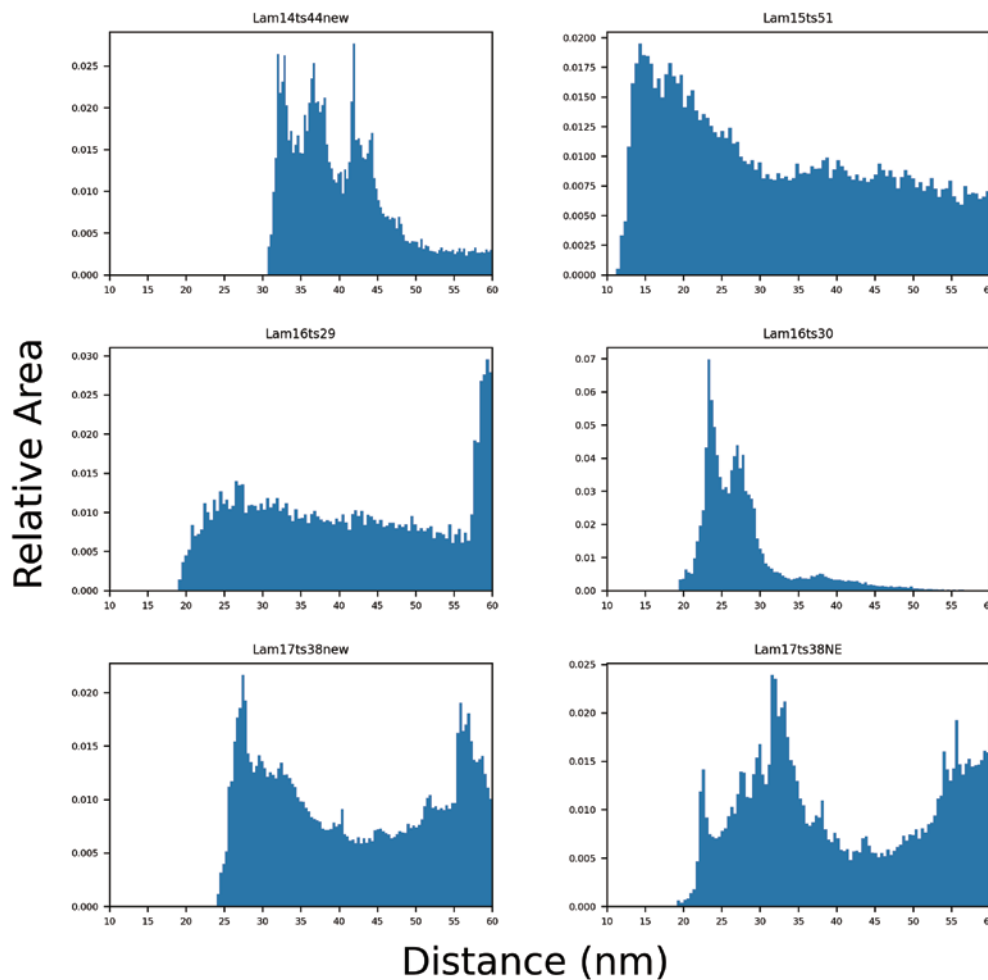

## Supplemental Figure 7

bioRxiv preprint doi: <https://doi.org/10.1101/2023.08.22.554218>; this version posted August 22, 2023. The copyright holder for this preprint (which was not certified by peer review) is the author/funder. All rights reserved. No reuse allowed without permission.

**A**

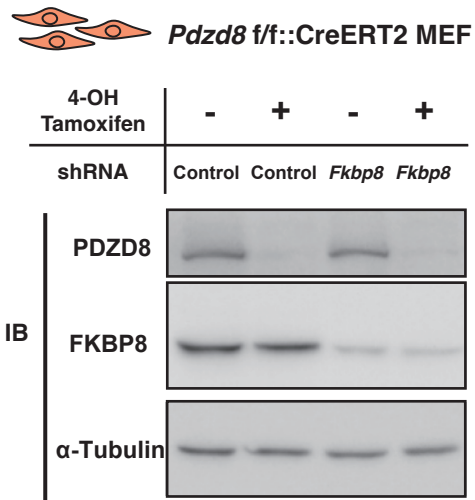

**Slow down** **PDZD8** **Dynamic**

ER

Mitochondria

Mitochondria-ER contact site  
(MERCS)

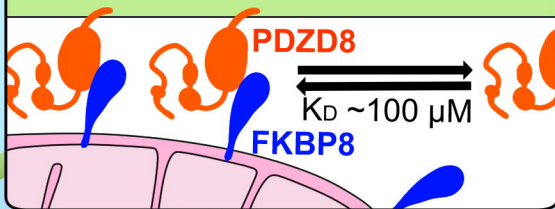

**FKBP8 OE**

MERCS area  $\uparrow\uparrow$   
MERCS distance  $\downarrow\downarrow$

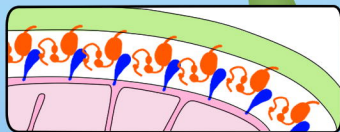

**FKBP8 KD**

MERCS area  $\downarrow\downarrow$

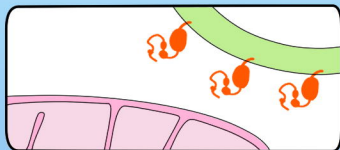

Source: https://www.biorxiv.org/content/10.1101/2023.08.22.554218v1.full.pdf
